# Supplementary material for: Causal relationship between 731 immune cells and the risk of myeloproliferative neoplasms: A 2-sample bidirectional Mendelian randomization study
Source: PubMed Central journal article supplement — Medicine (Baltimore). 2024 Dec 20;103(51):e40945. doi: 10.1097/MD.0000000000040945 (PMC11666147; doi:10.1097/md.0000000000040945), 2024-12-20

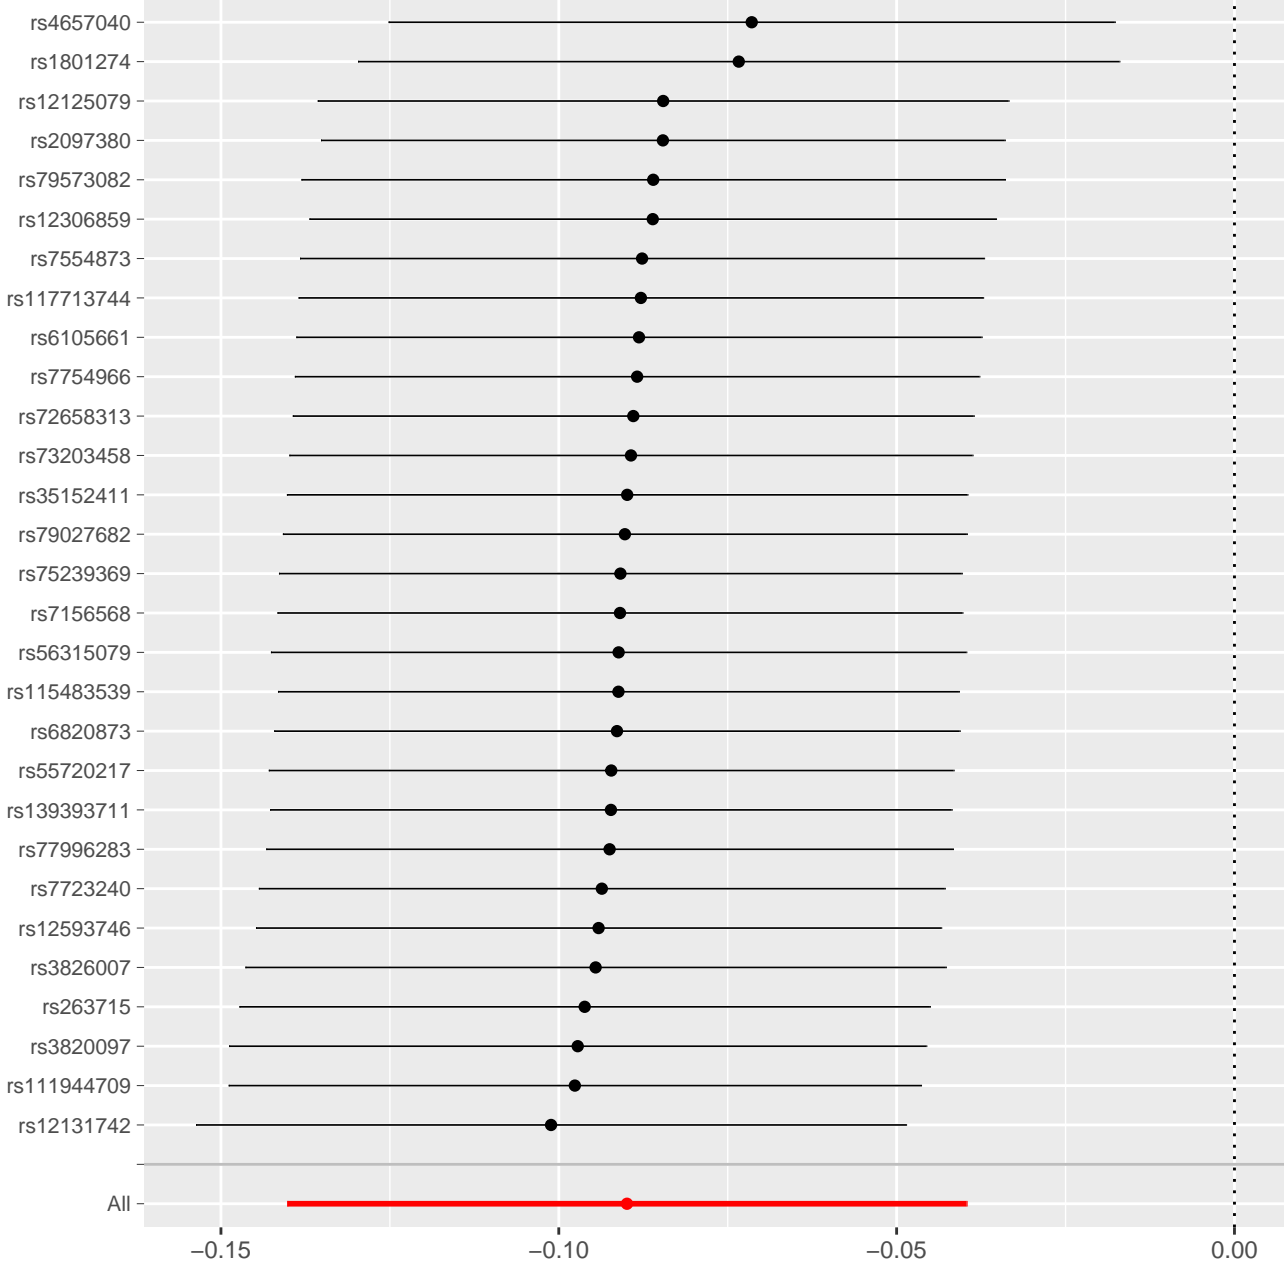

MR leave-one-out sensitivity analysis for 'CD33dim HLA DR+ CD11b+ %CD33dim HLA DR+' on 'Myeloproliferative Neoplasms'

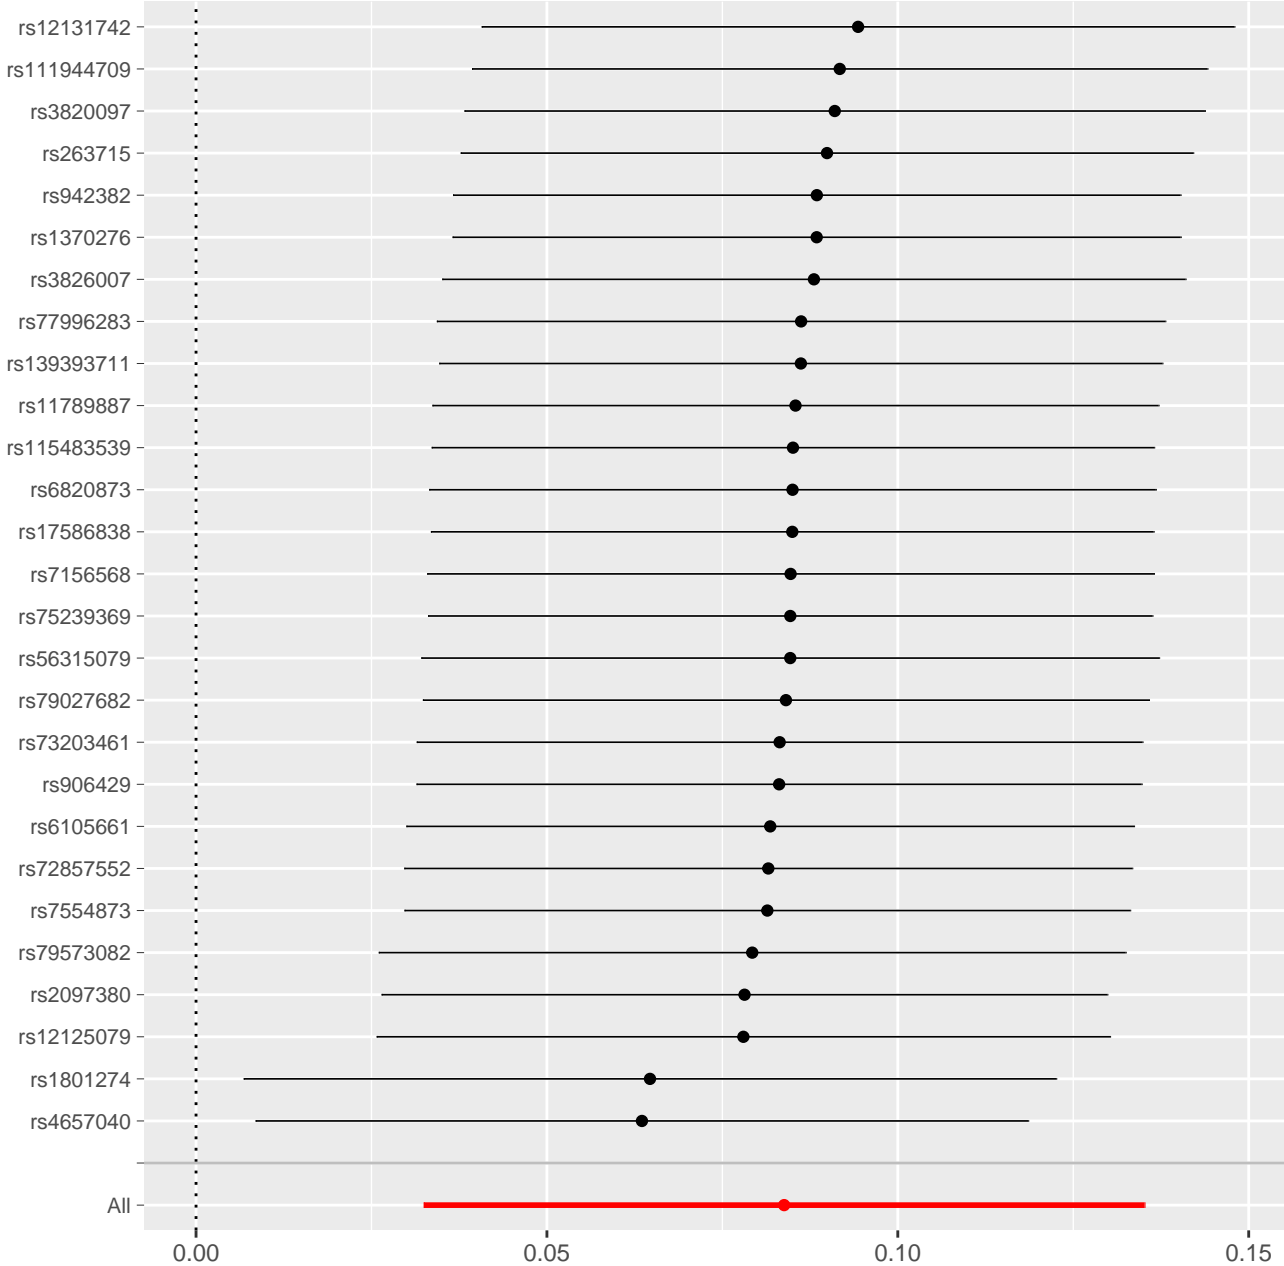

MR leave-one-out sensitivity analysis for 'CD33dim HLA DR+ CD11b- %CD33dim HLA DR+' on 'Myeloproliferative Neoplasms'

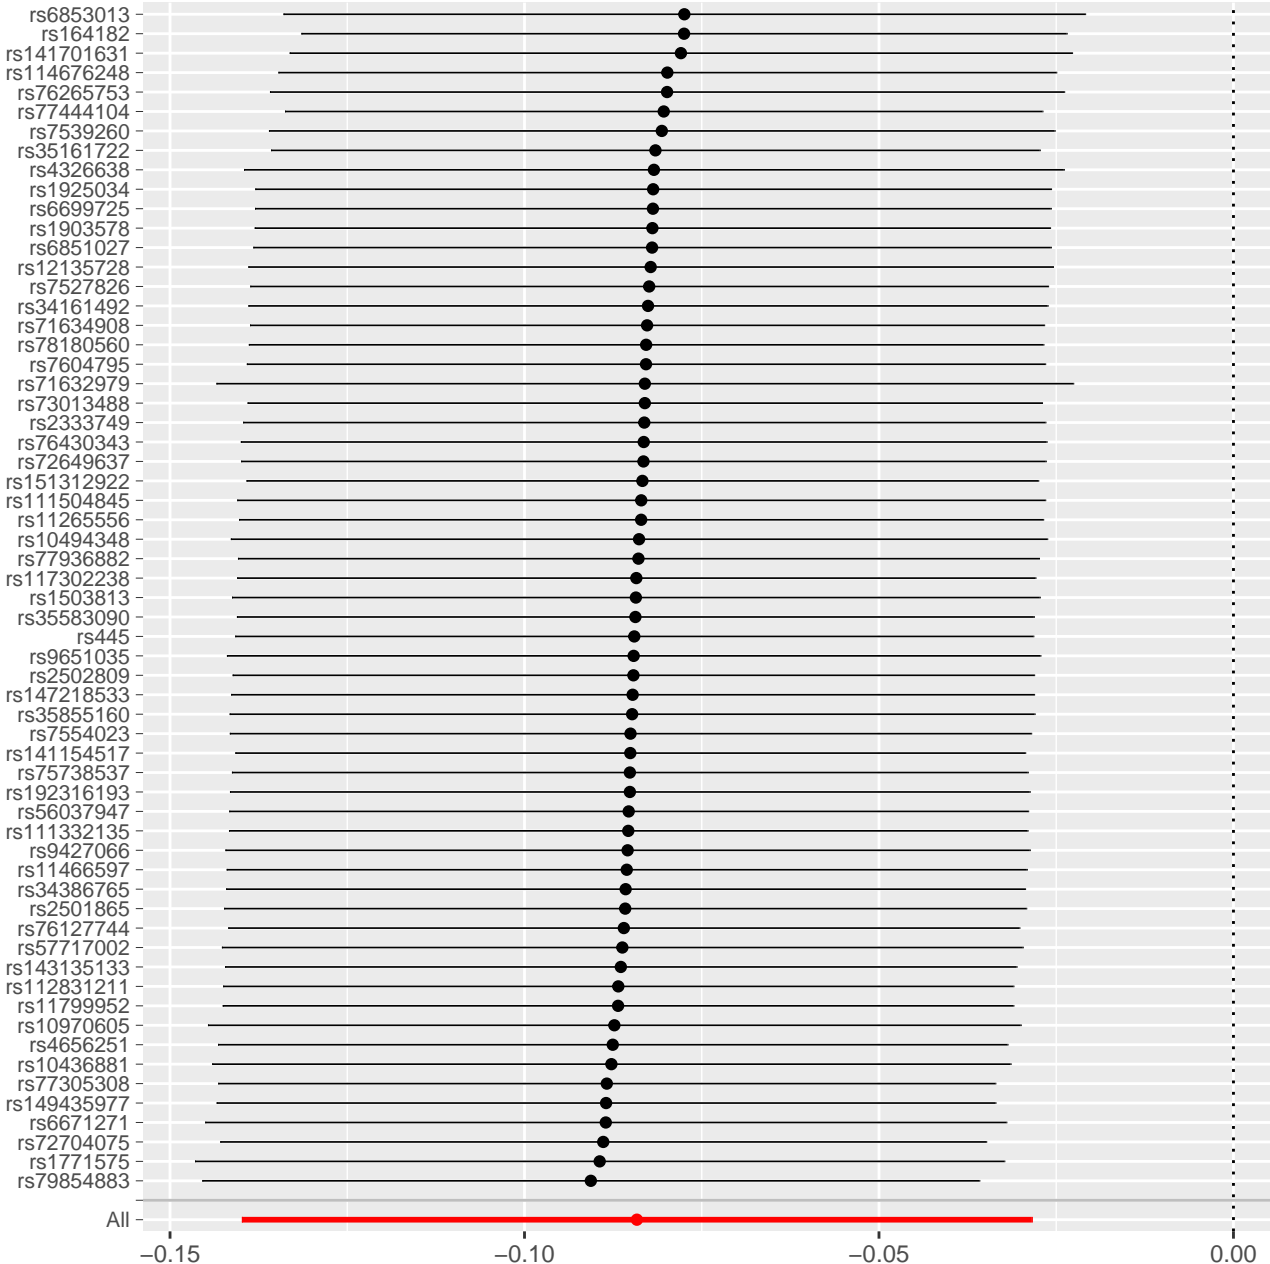

MR leave-one-out sensitivity analysis for 'CD14+ CD16+ monocyte %monocyte' on 'Myeloproliferative Neoplasms'

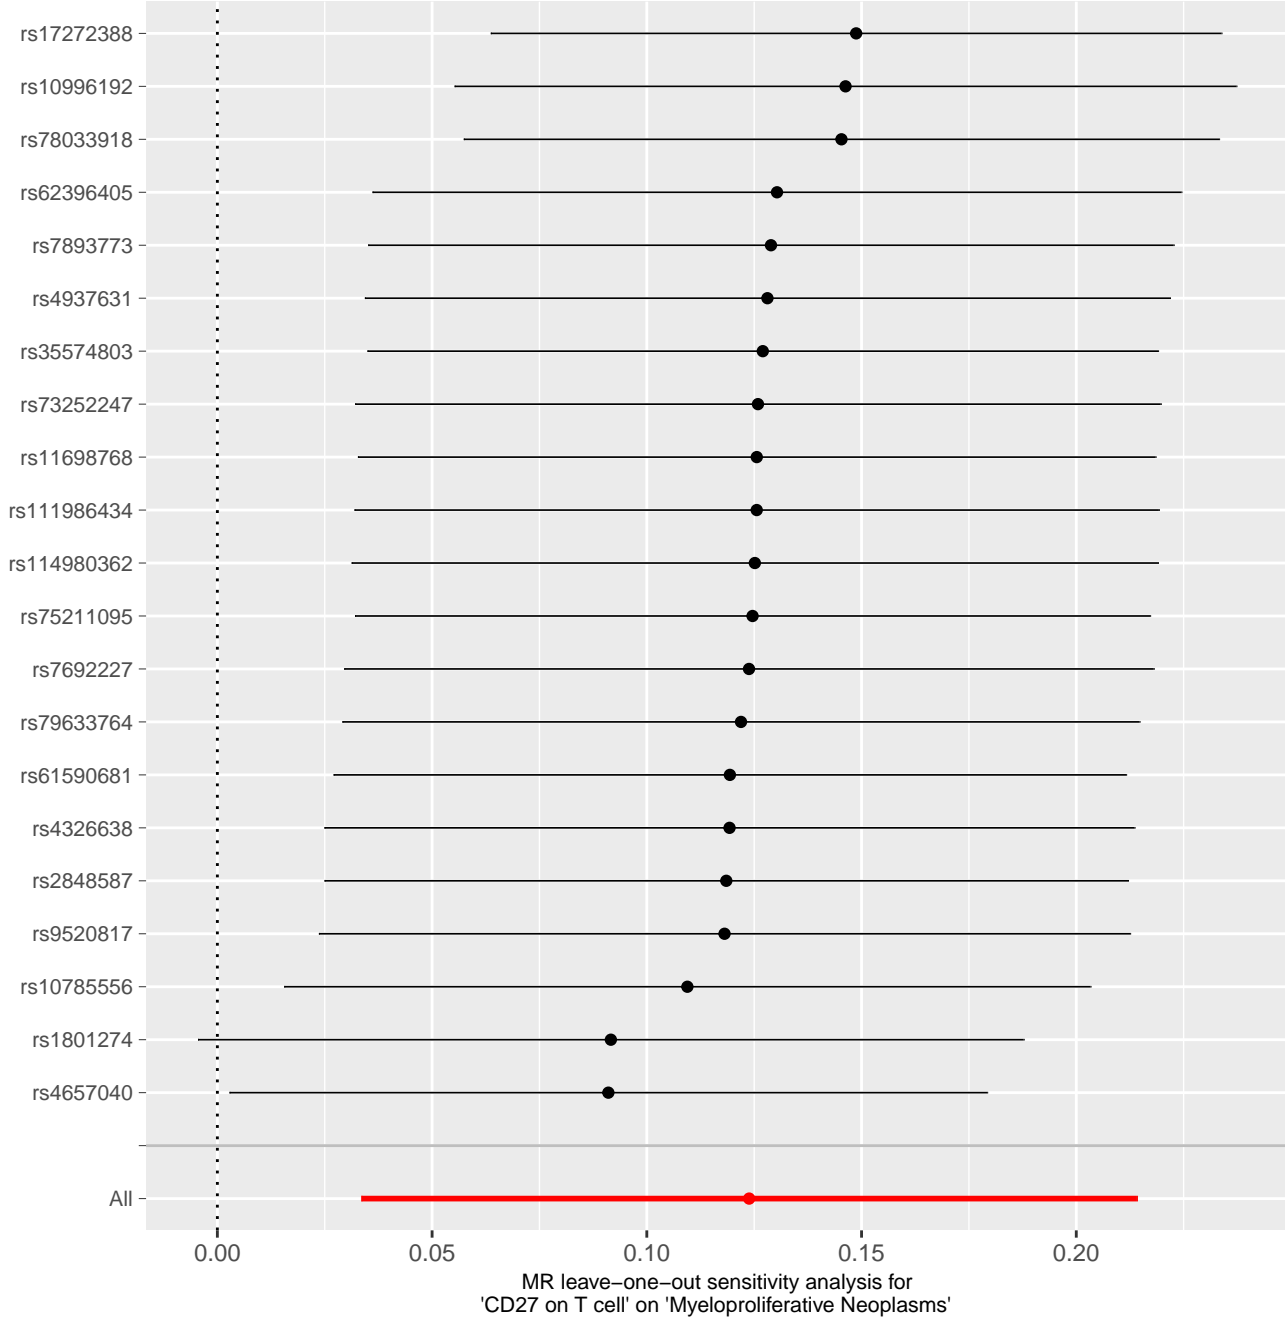

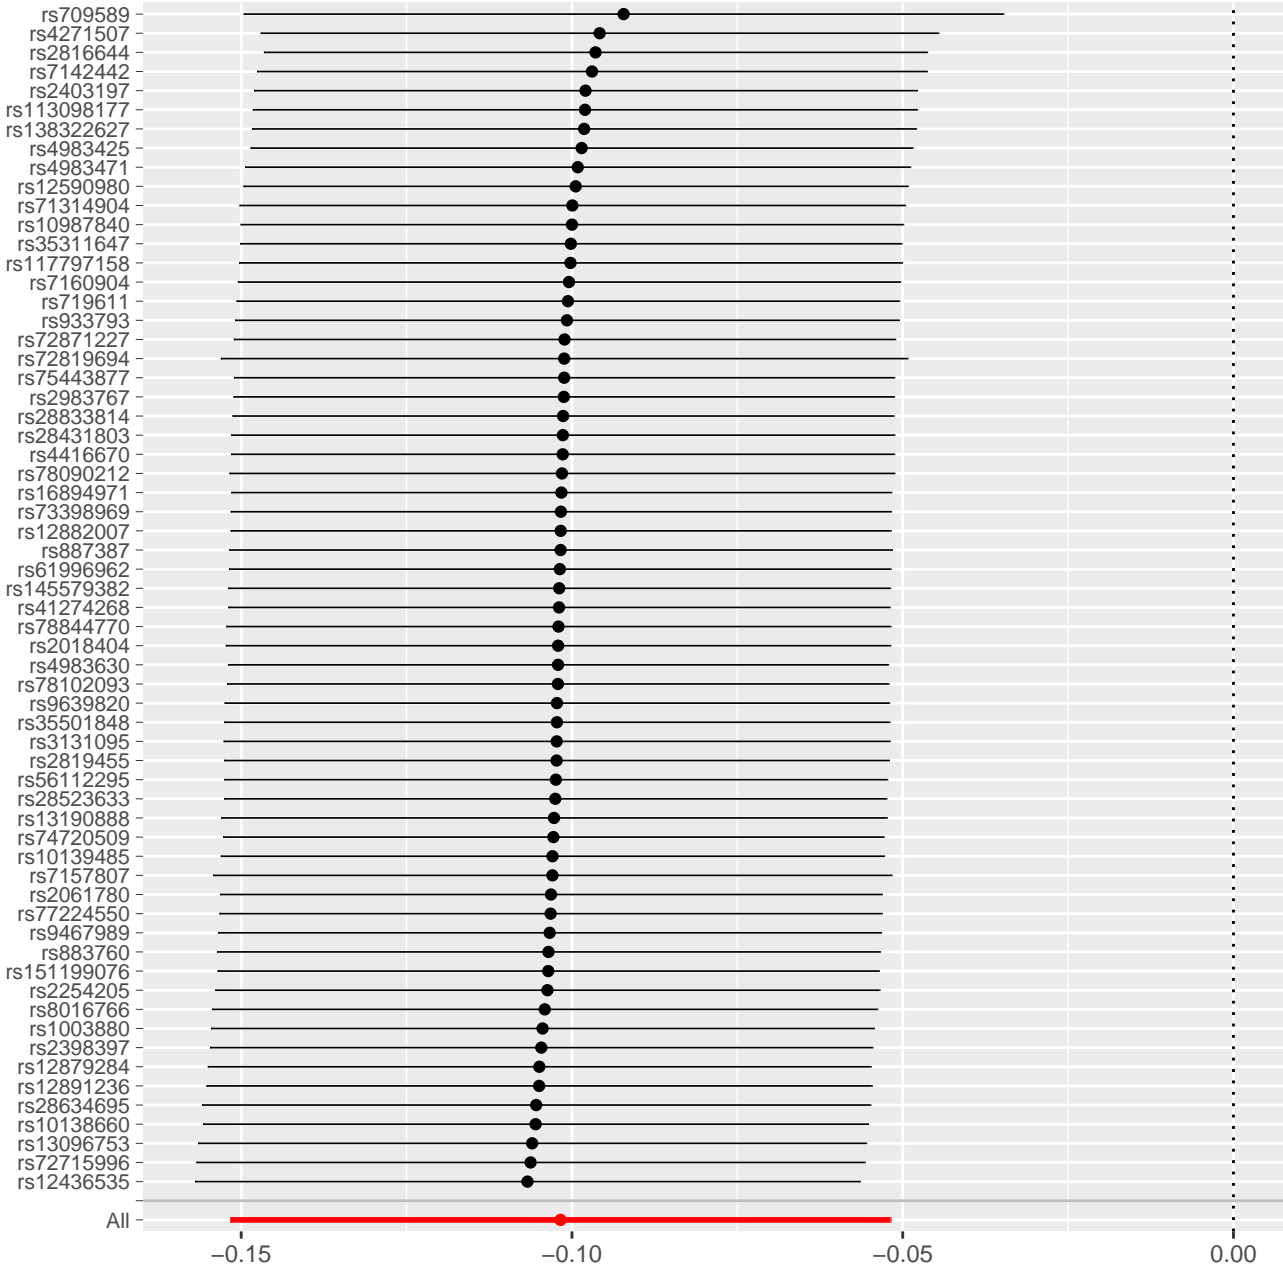

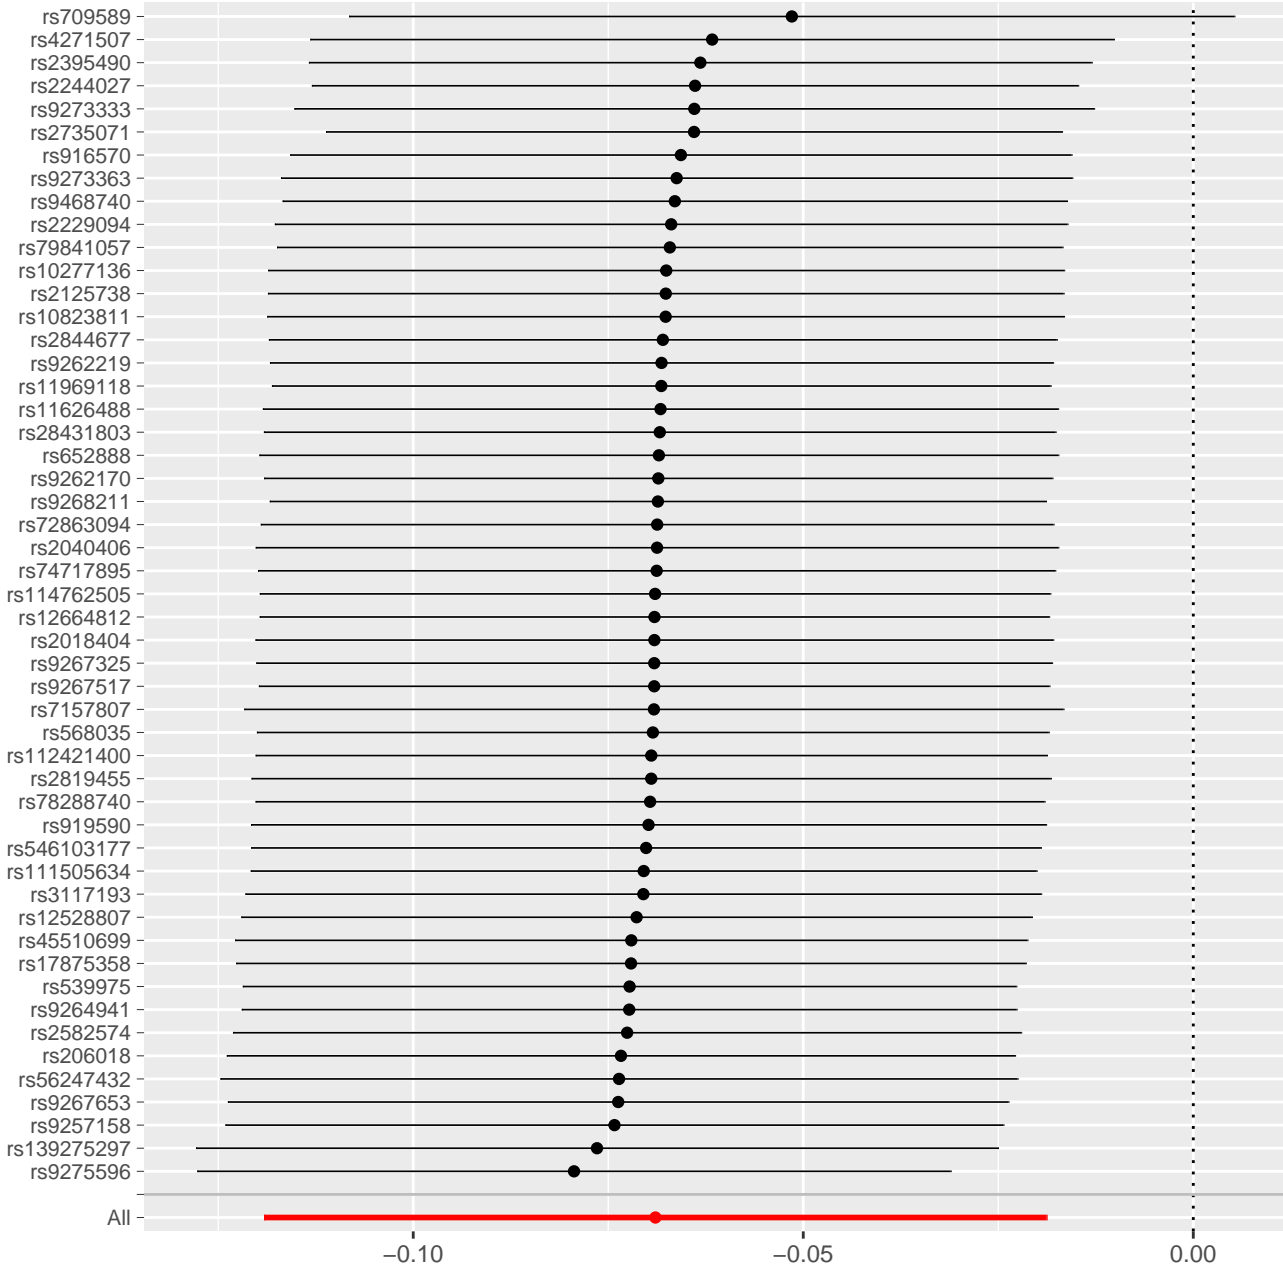

MR leave-one-out sensitivity analysis for 'IgD on IgD+ CD38- unsw mem' on 'Myeloproliferative Neoplasms'

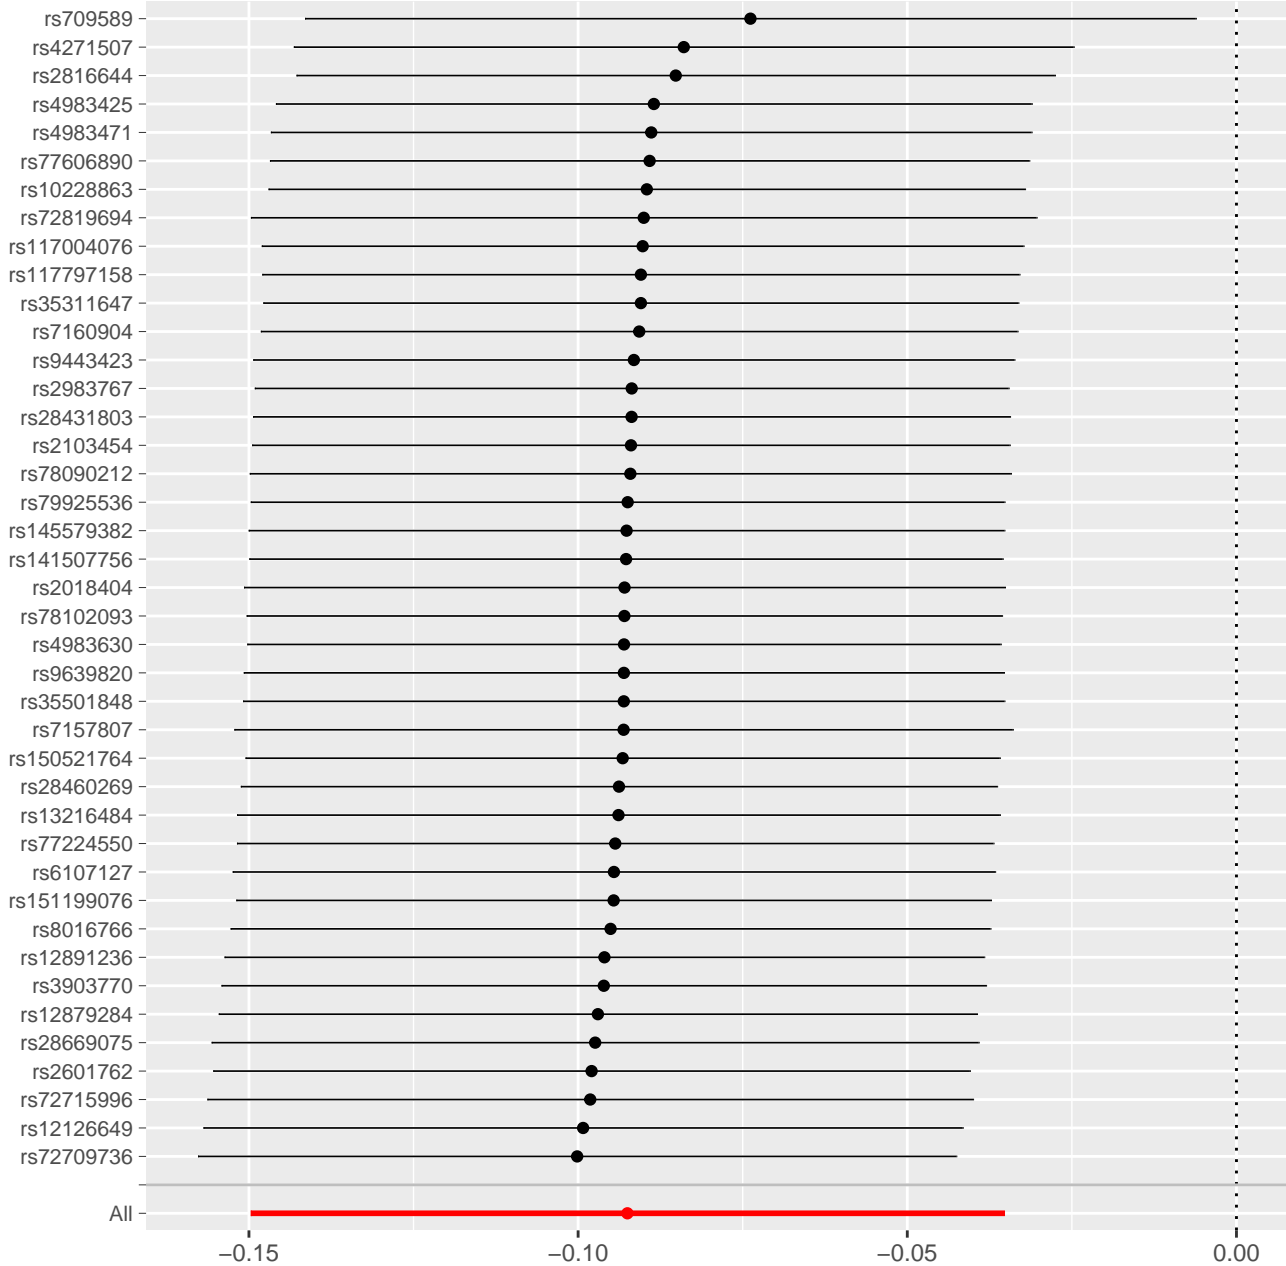

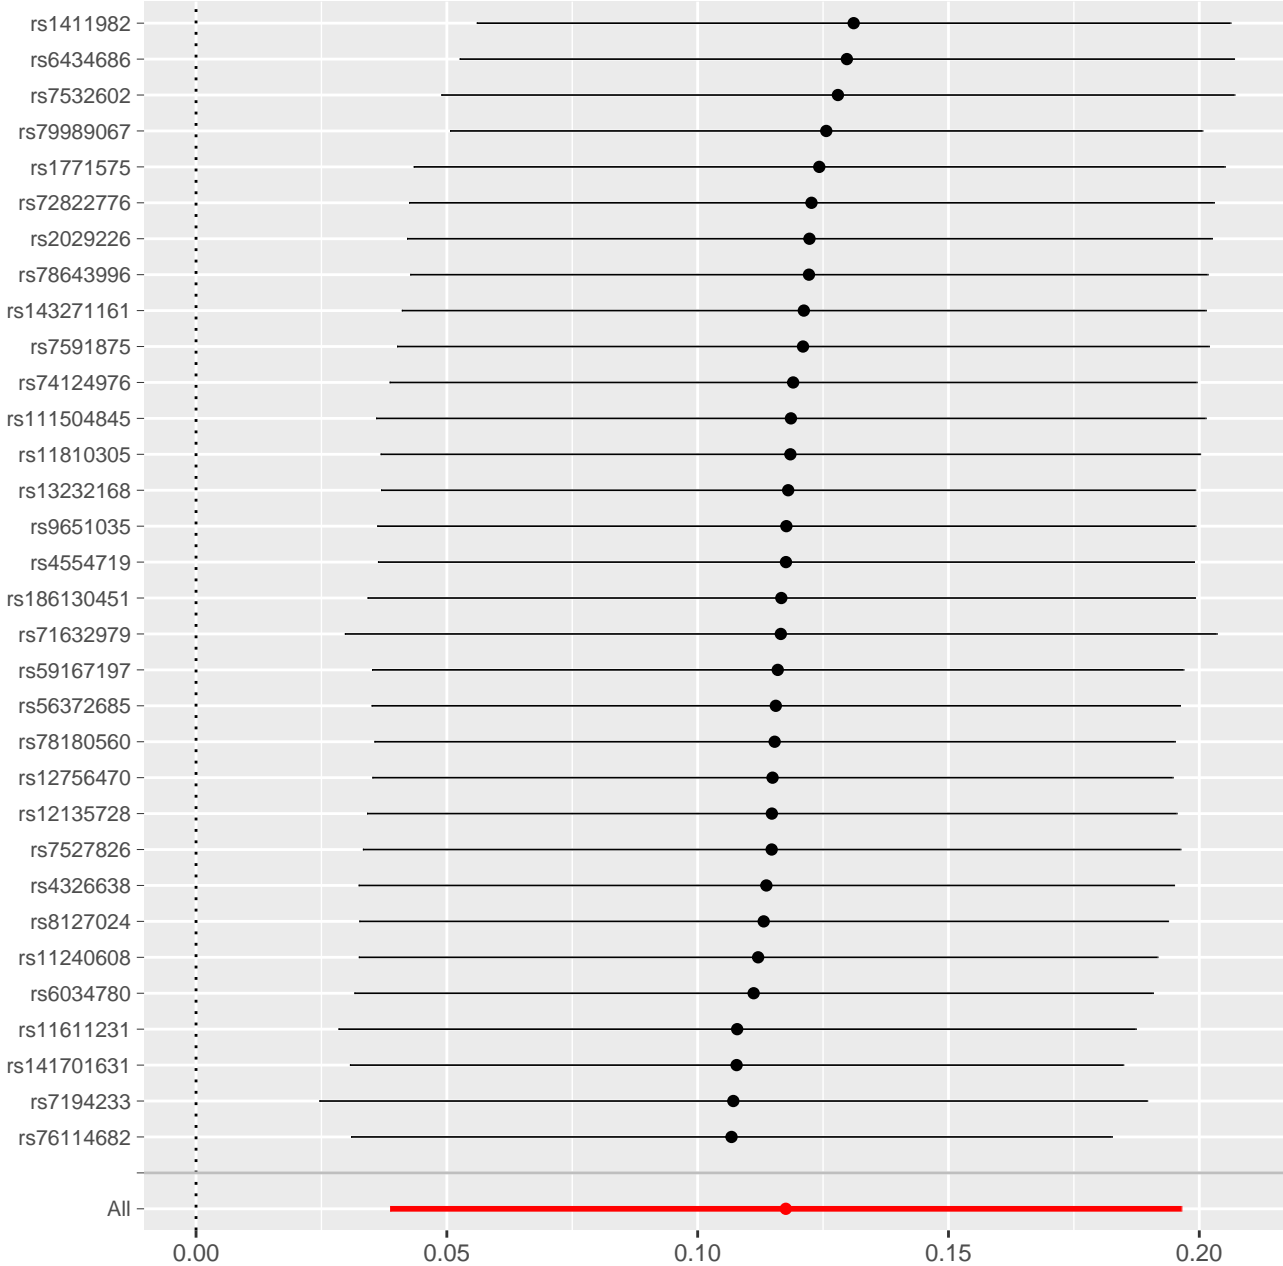

MR leave-one-out sensitivity analysis for  
'CD86 on myeloid DC' on 'Myeloproliferative Neoplasms'



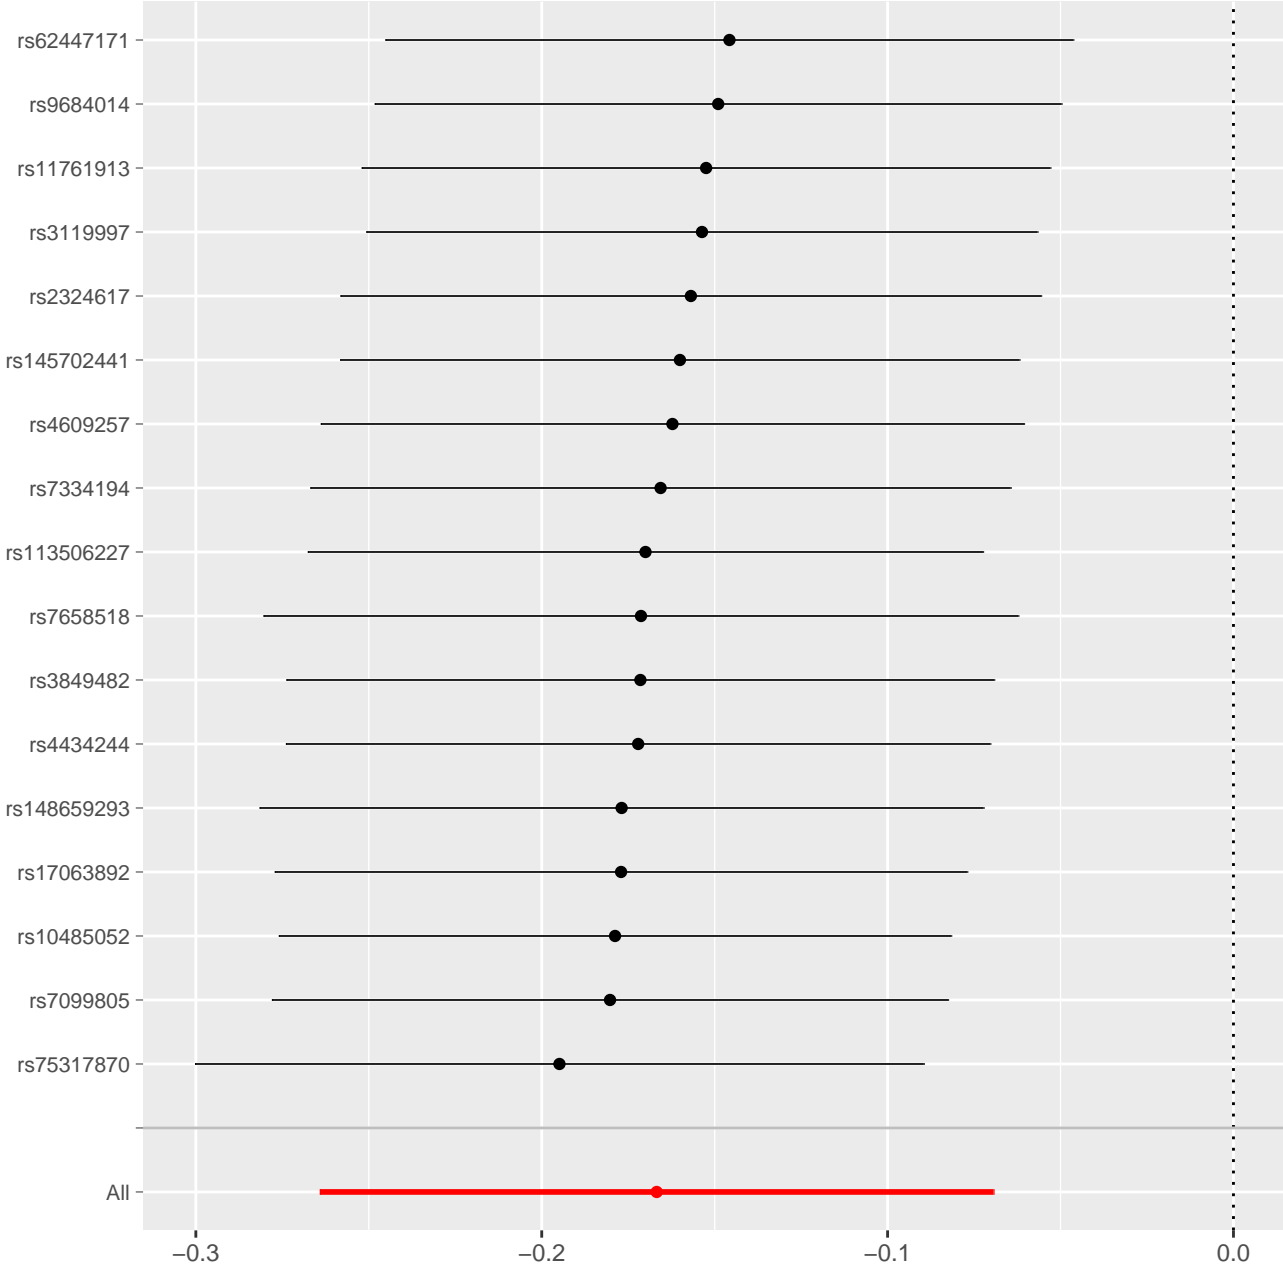

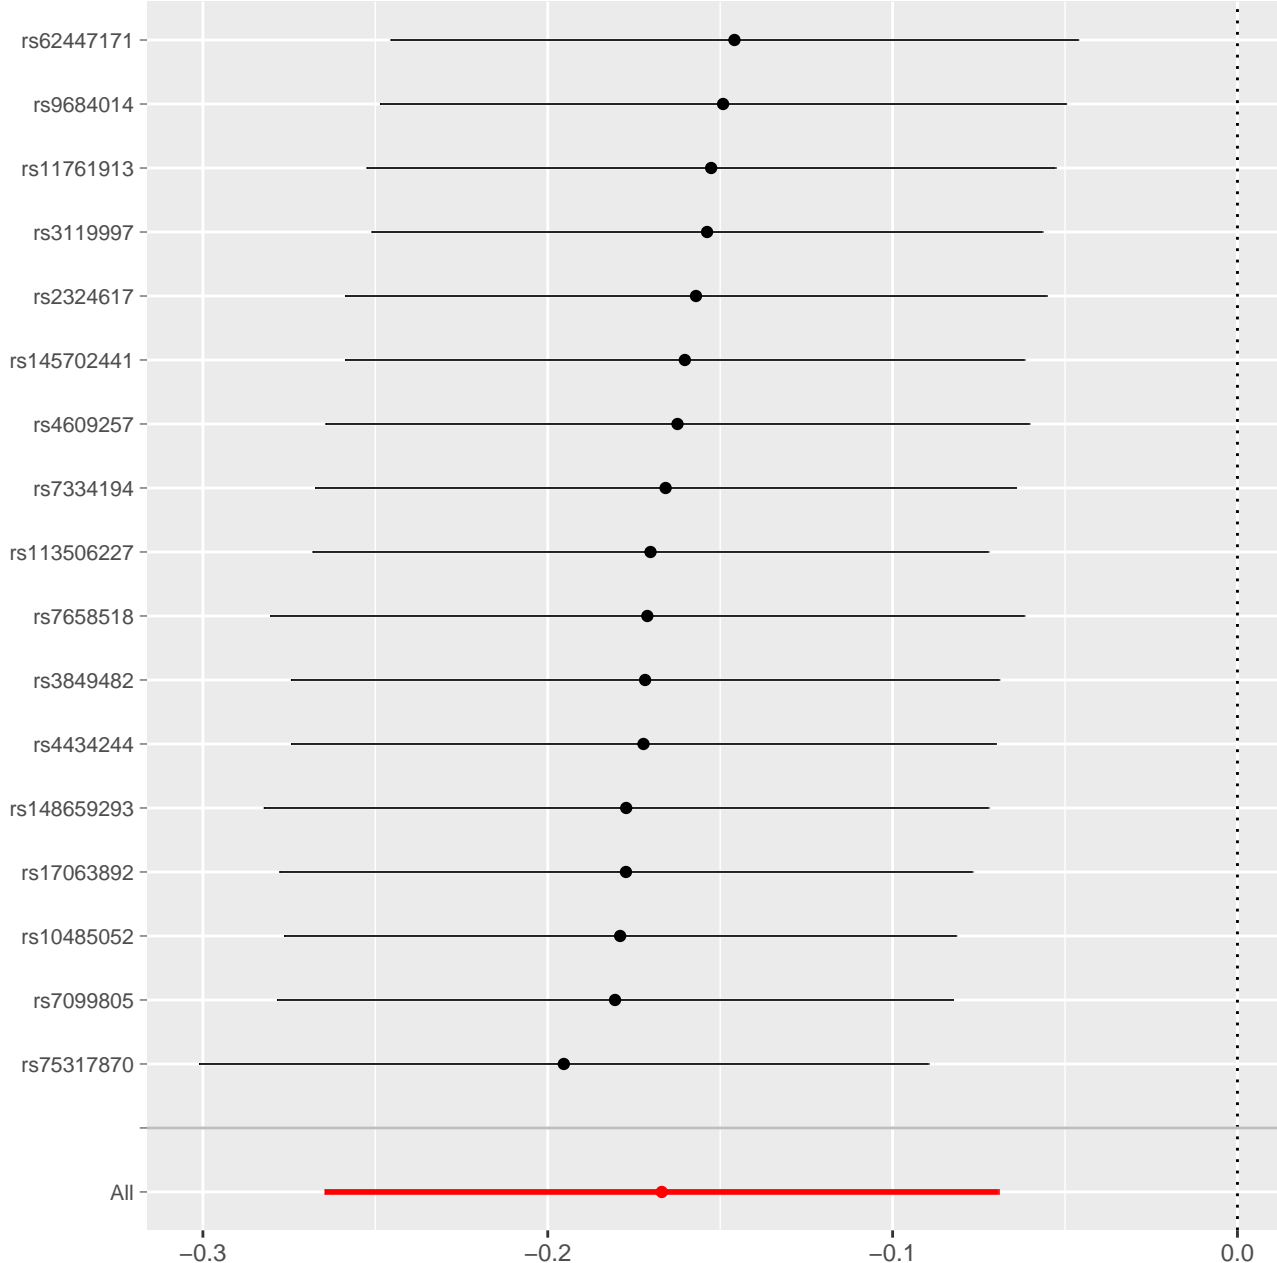

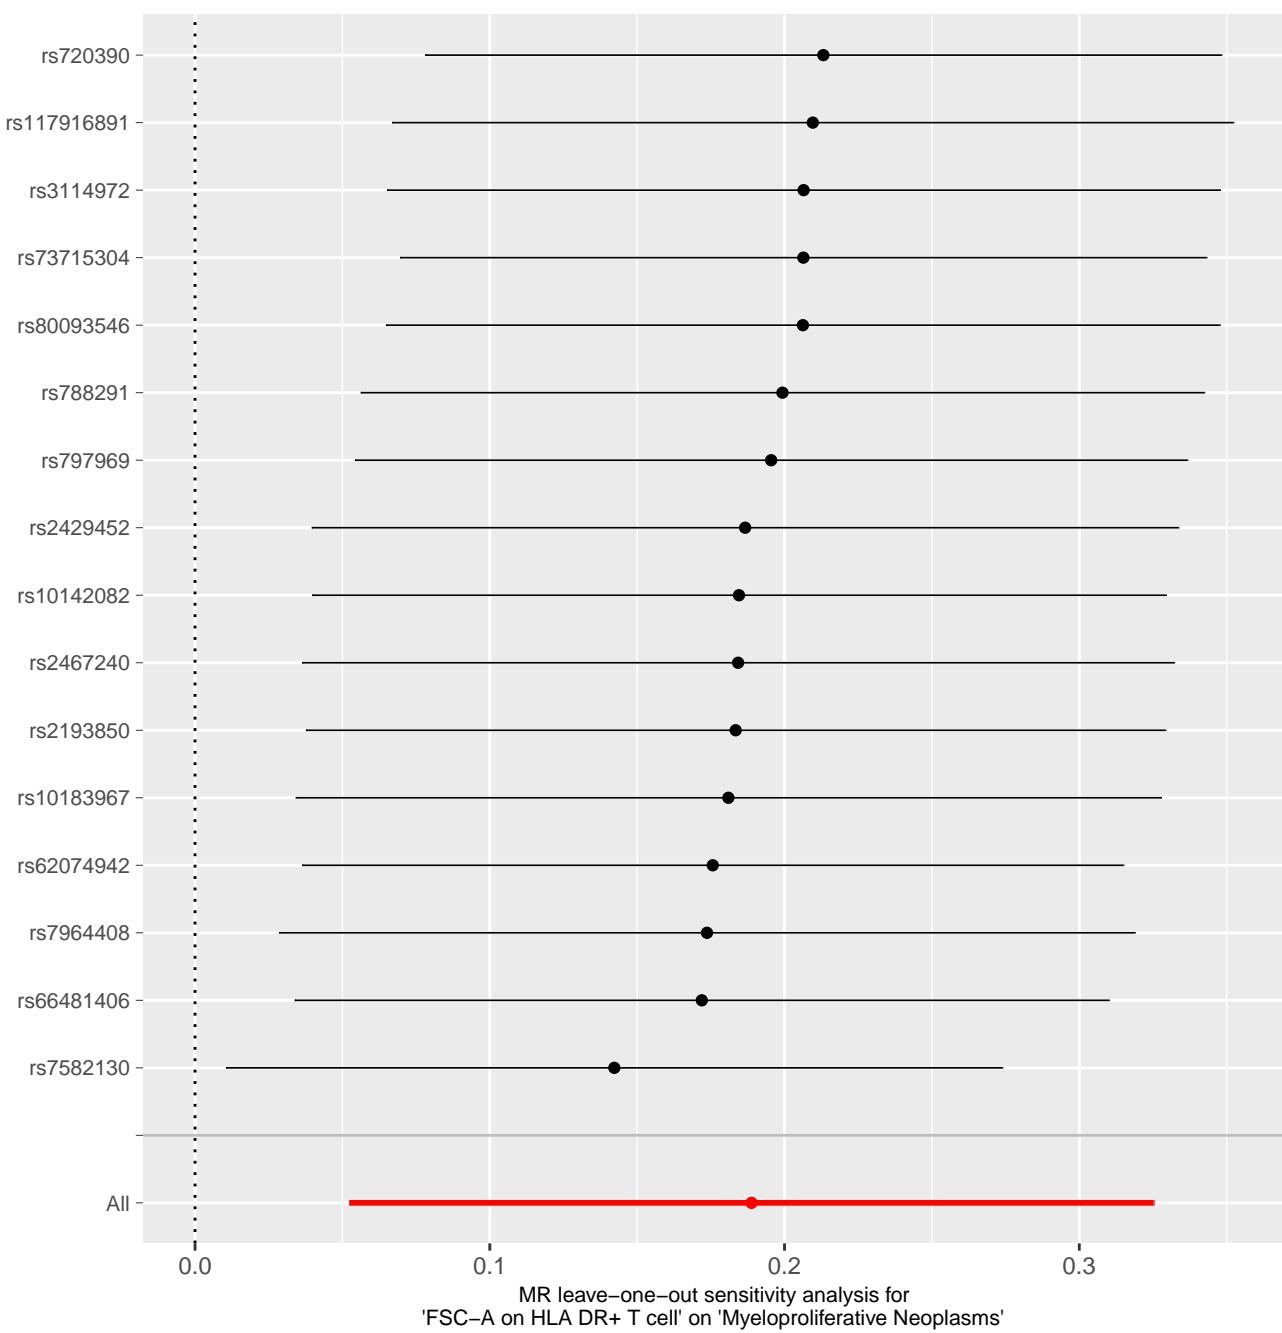

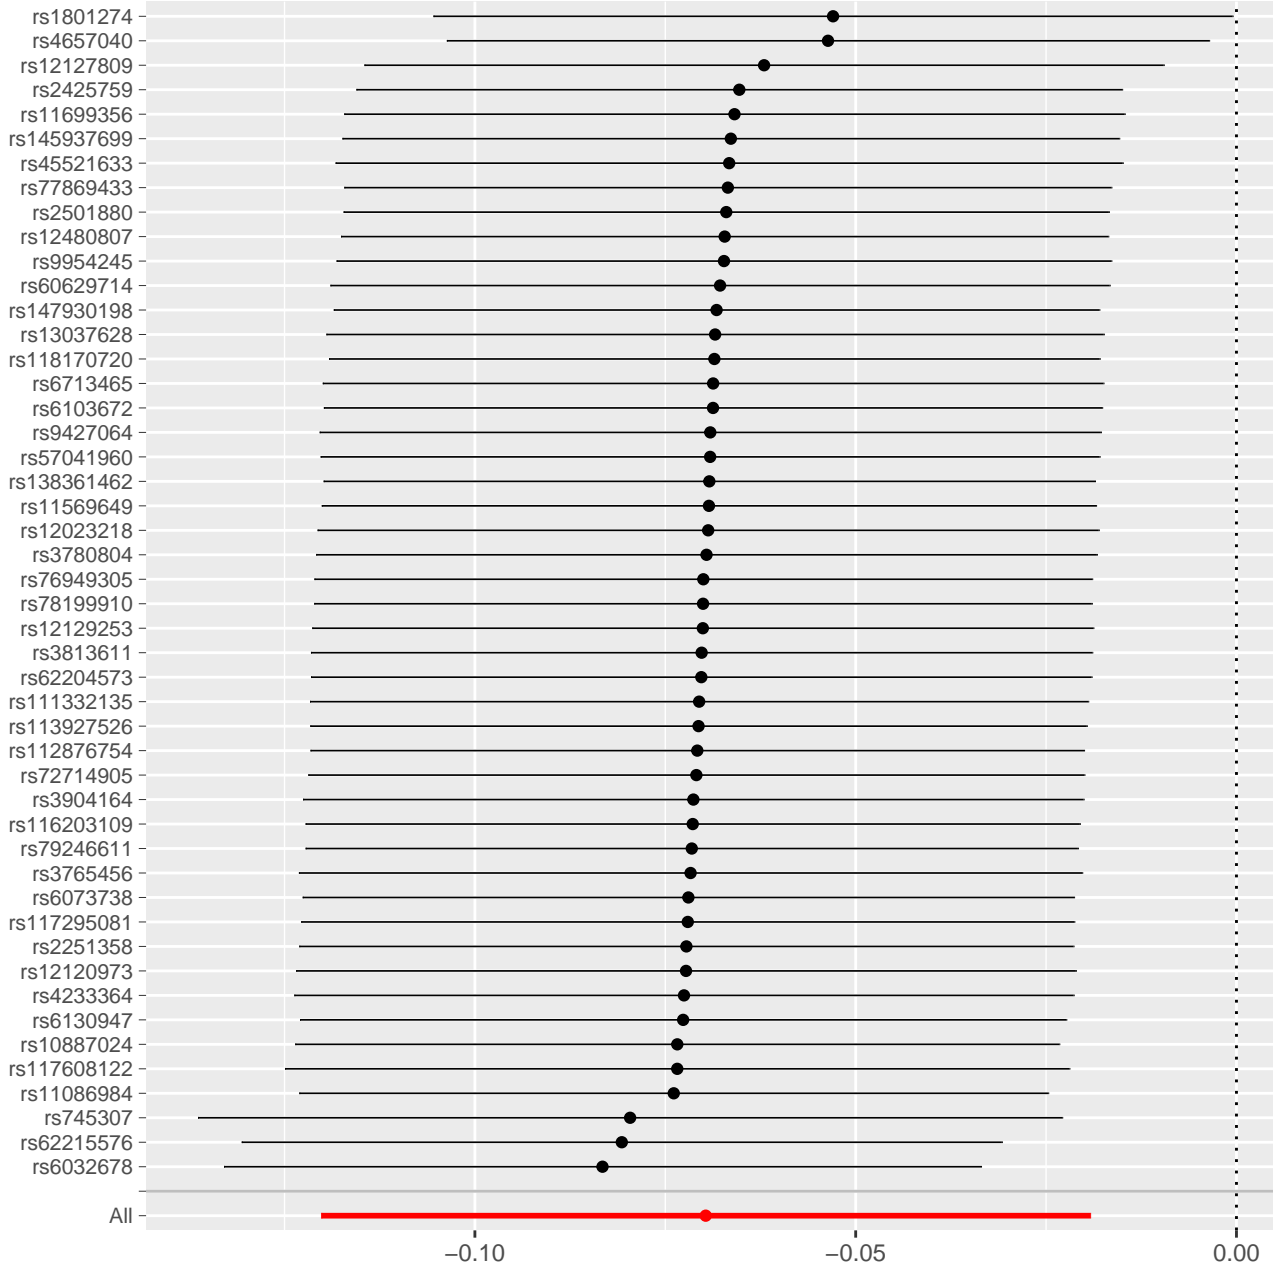

MR leave-one-out sensitivity analysis for 'CD40 on CD14+ CD16- monocyte' on 'Myeloproliferative Neoplasms'

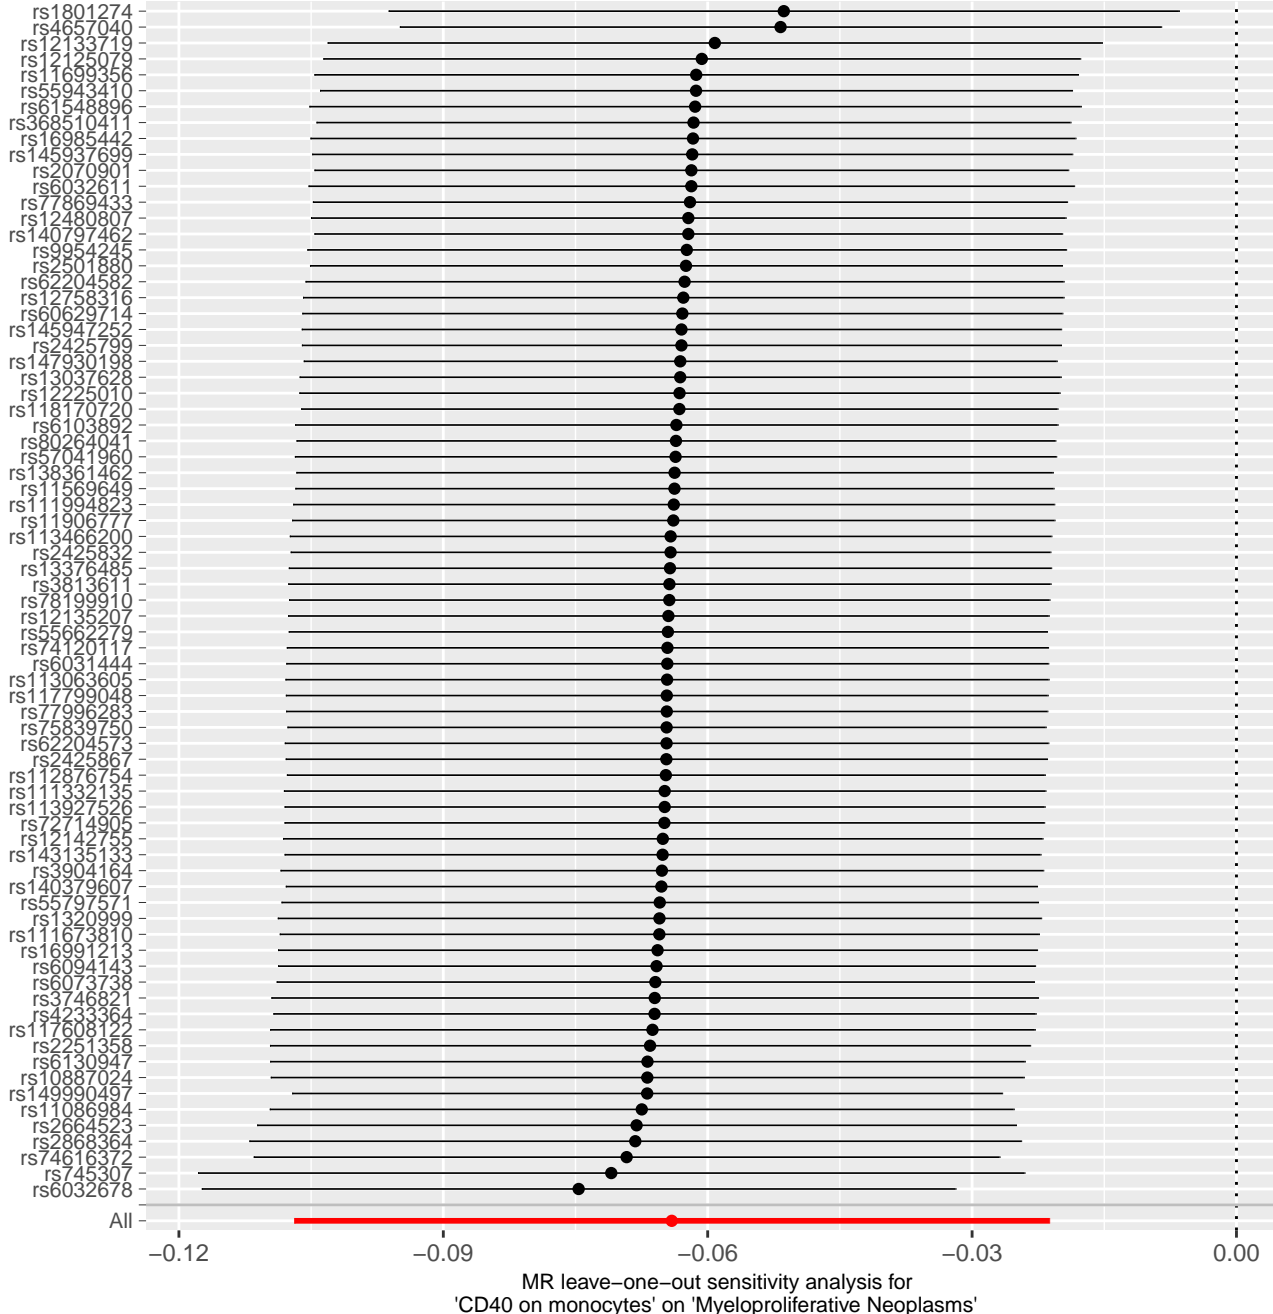

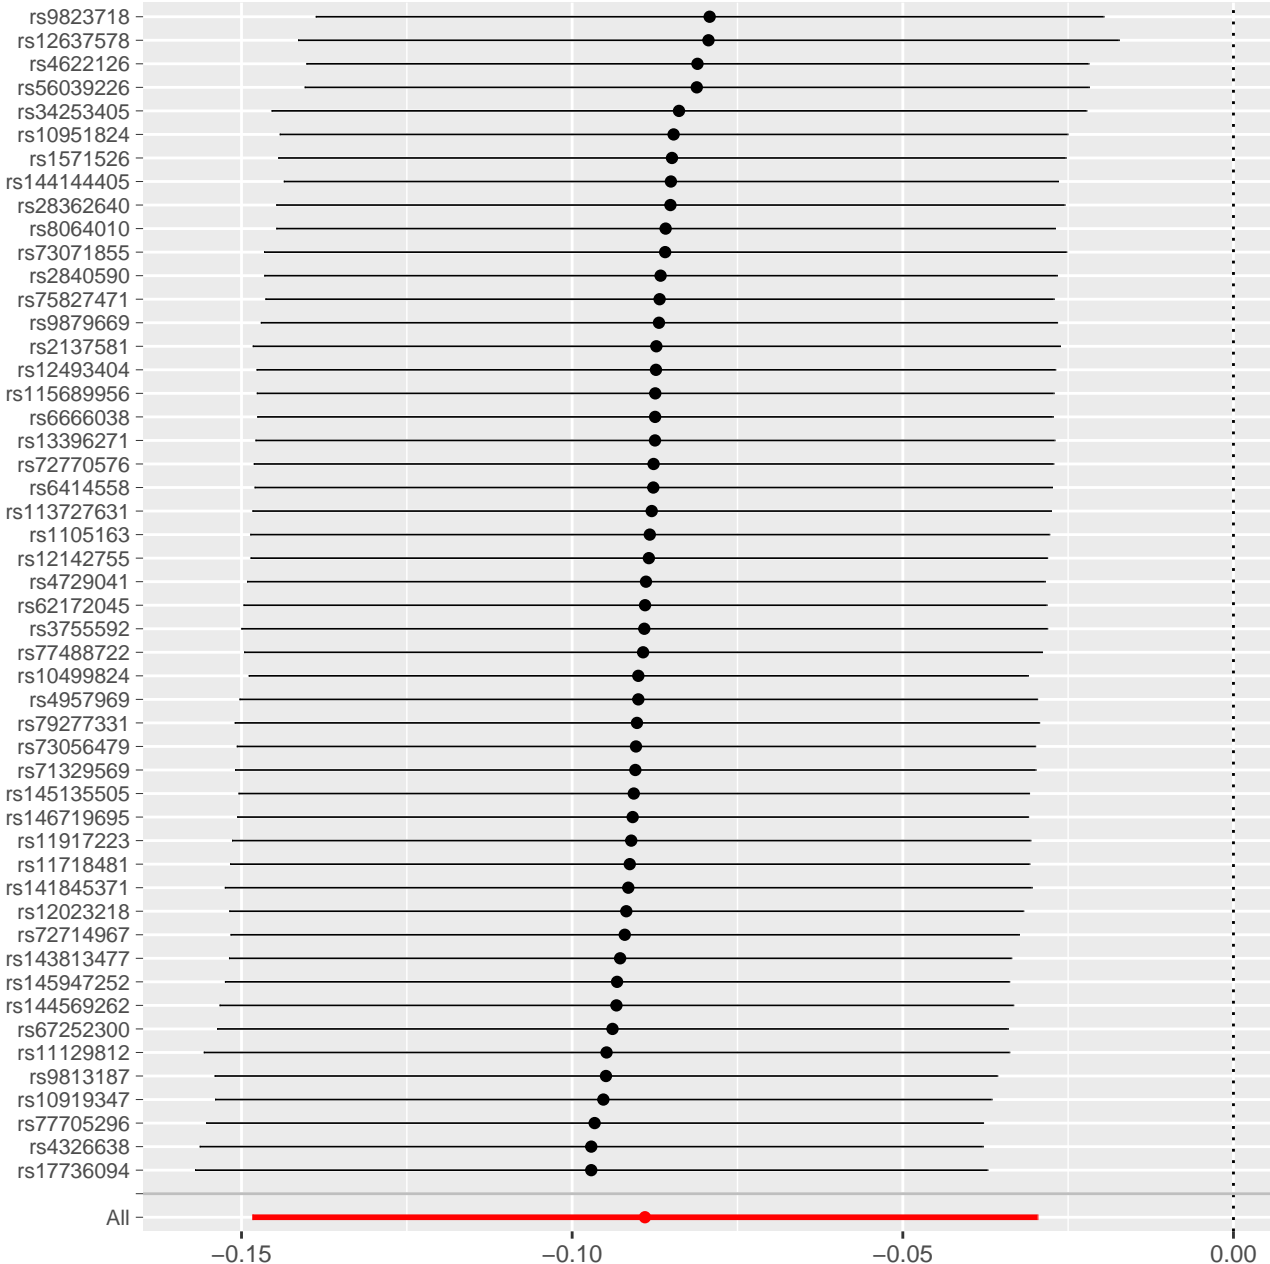

MR leave-one-out sensitivity analysis for 'CX3CR1 on CD14+ CD16- monocyte' on 'Myeloproliferative Neoplasms'

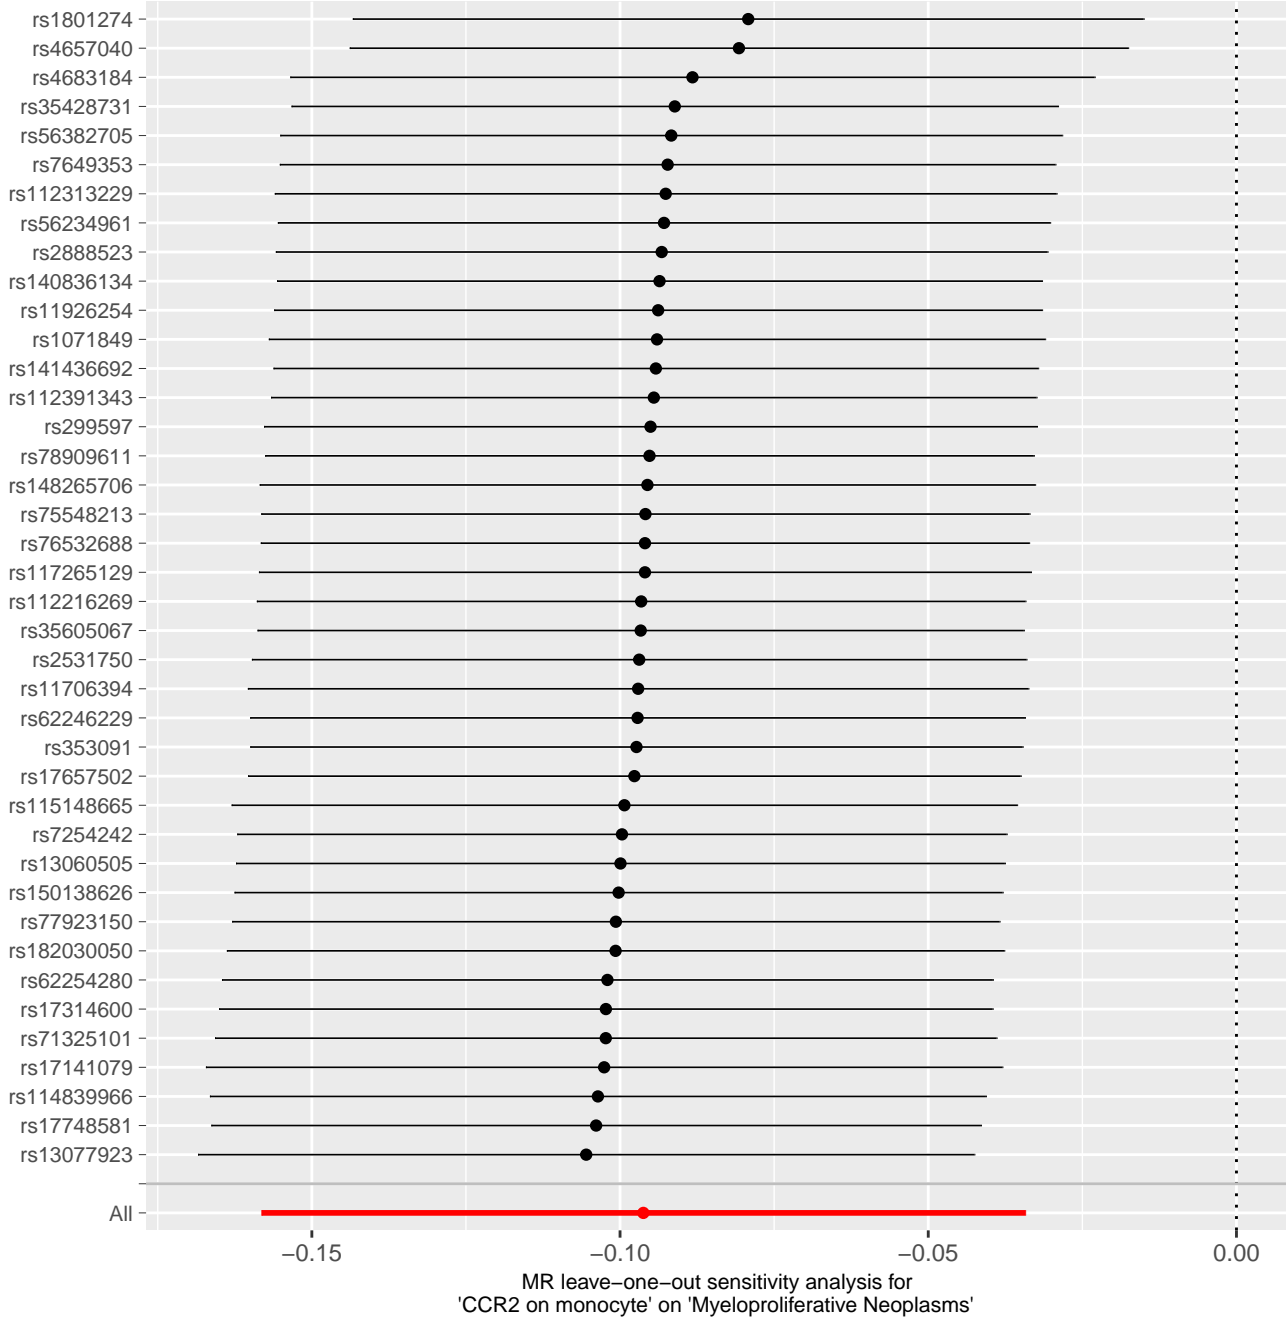

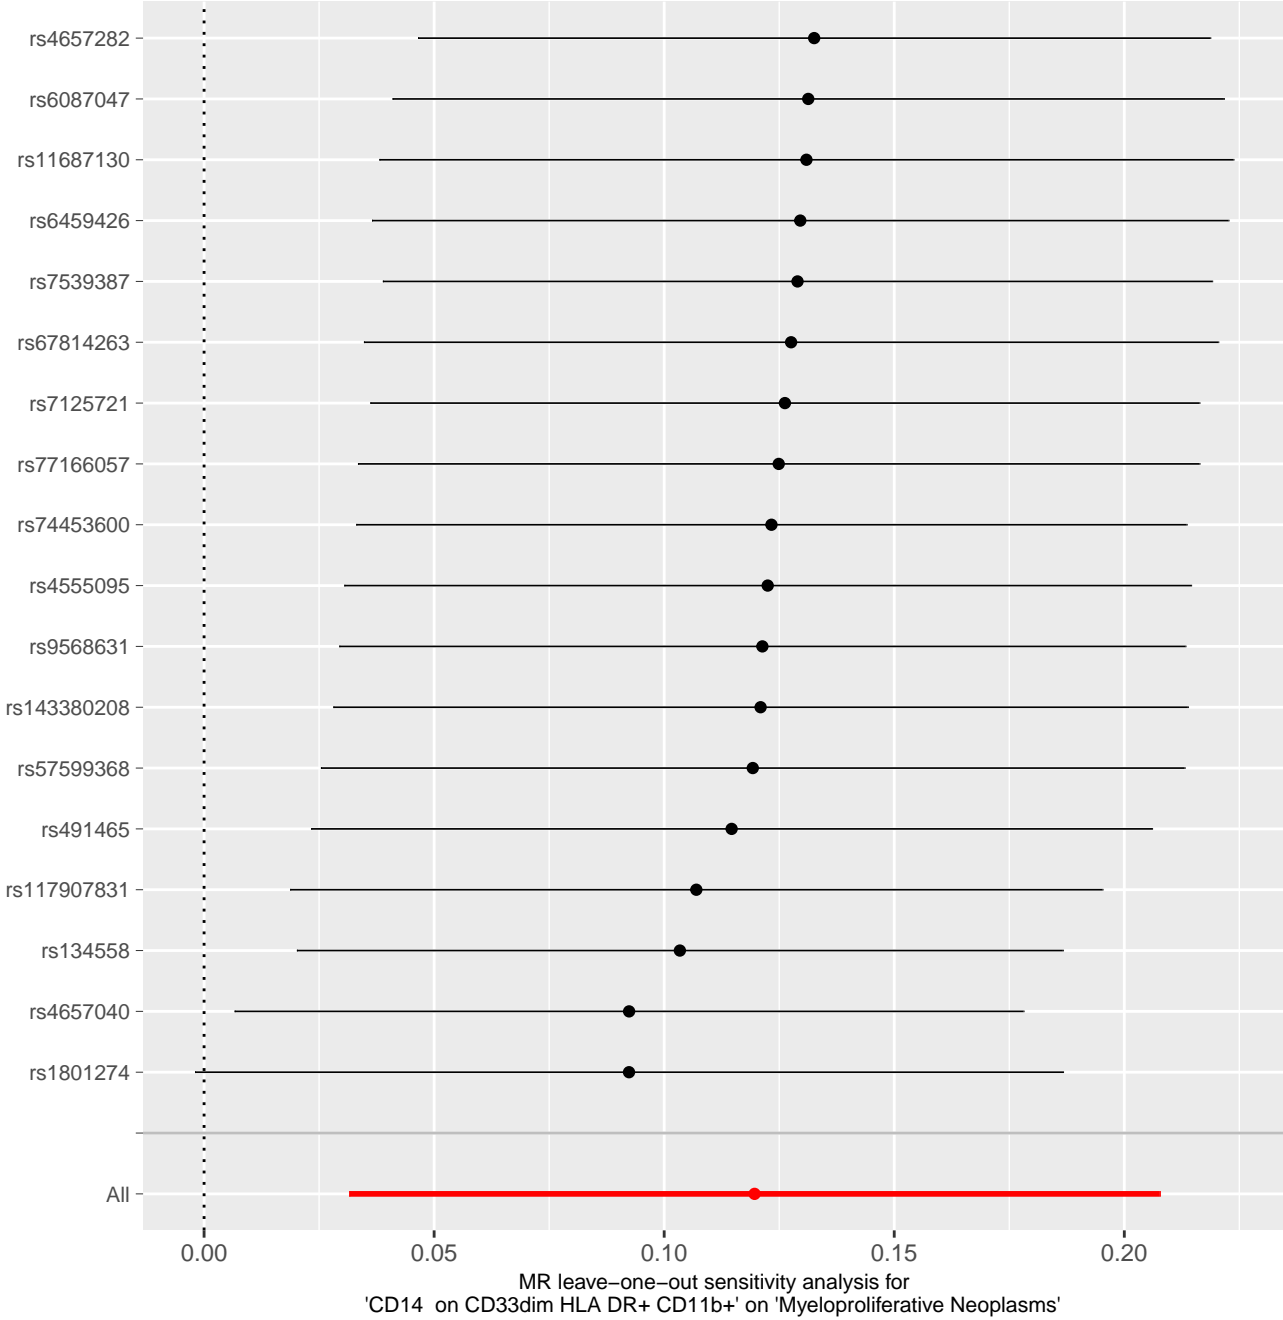



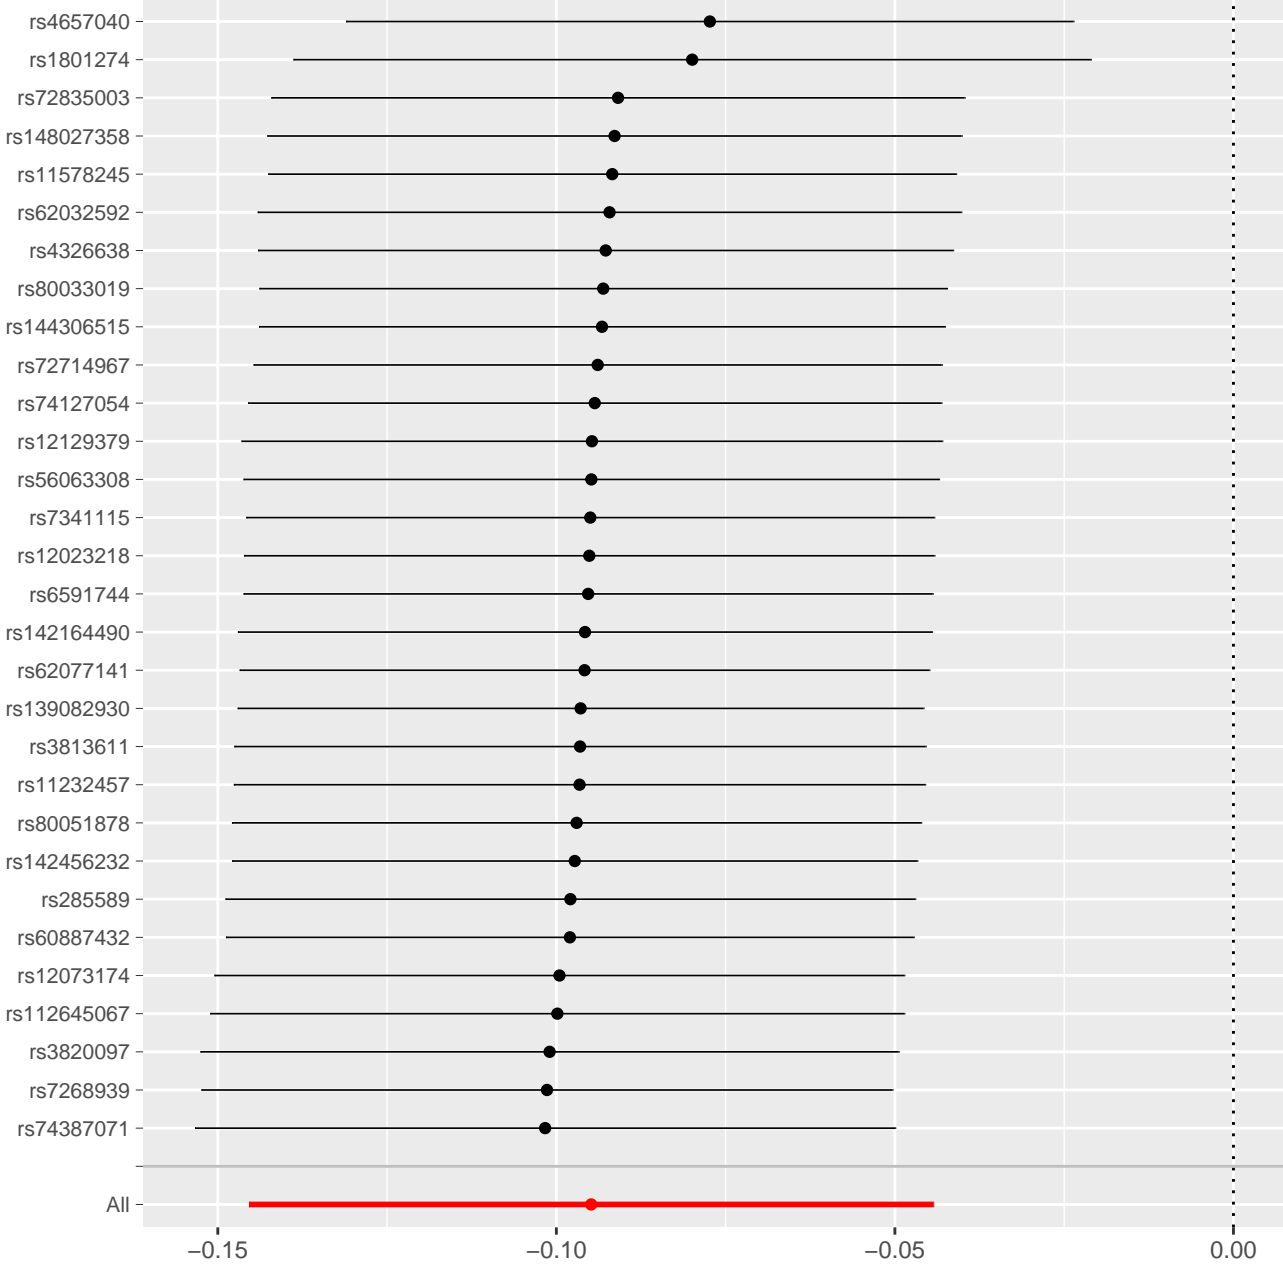

Supplement: medi-103-e40945-s002.pdf [file medi-103-e40945-s002.pdf]
