# Supplementary material for: Causal relationship between 731 immune cells and the risk of myeloproliferative neoplasms: A 2-sample bidirectional Mendelian randomization study
Source: PubMed Central journal article supplement — Medicine (Baltimore). 2024 Dec 20;103(51):e40945. doi: 10.1097/MD.0000000000040945 (PMC11666147; doi:10.1097/md.0000000000040945), 2024-12-20

MR Test

- Inverse variance weighted (fixed effects)
- MR Egger
- Simple mode
- Weighted median
- Weighted mode

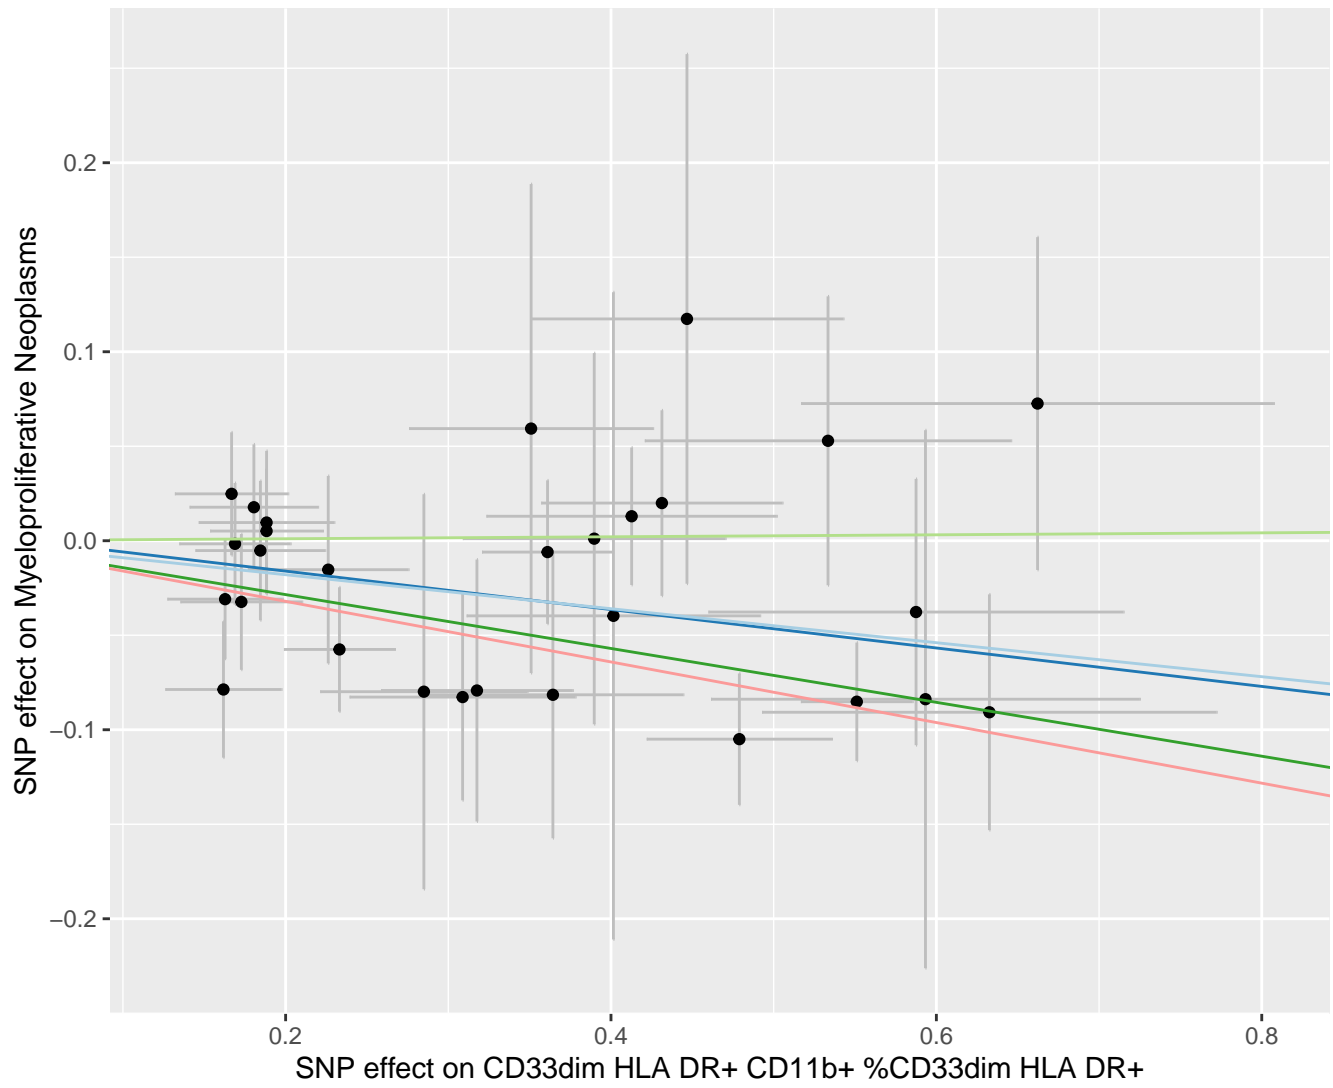

MR Test

- Inverse variance weighted (fixed effects)
- MR Egger
- Simple mode
- Weighted median
- Weighted mode

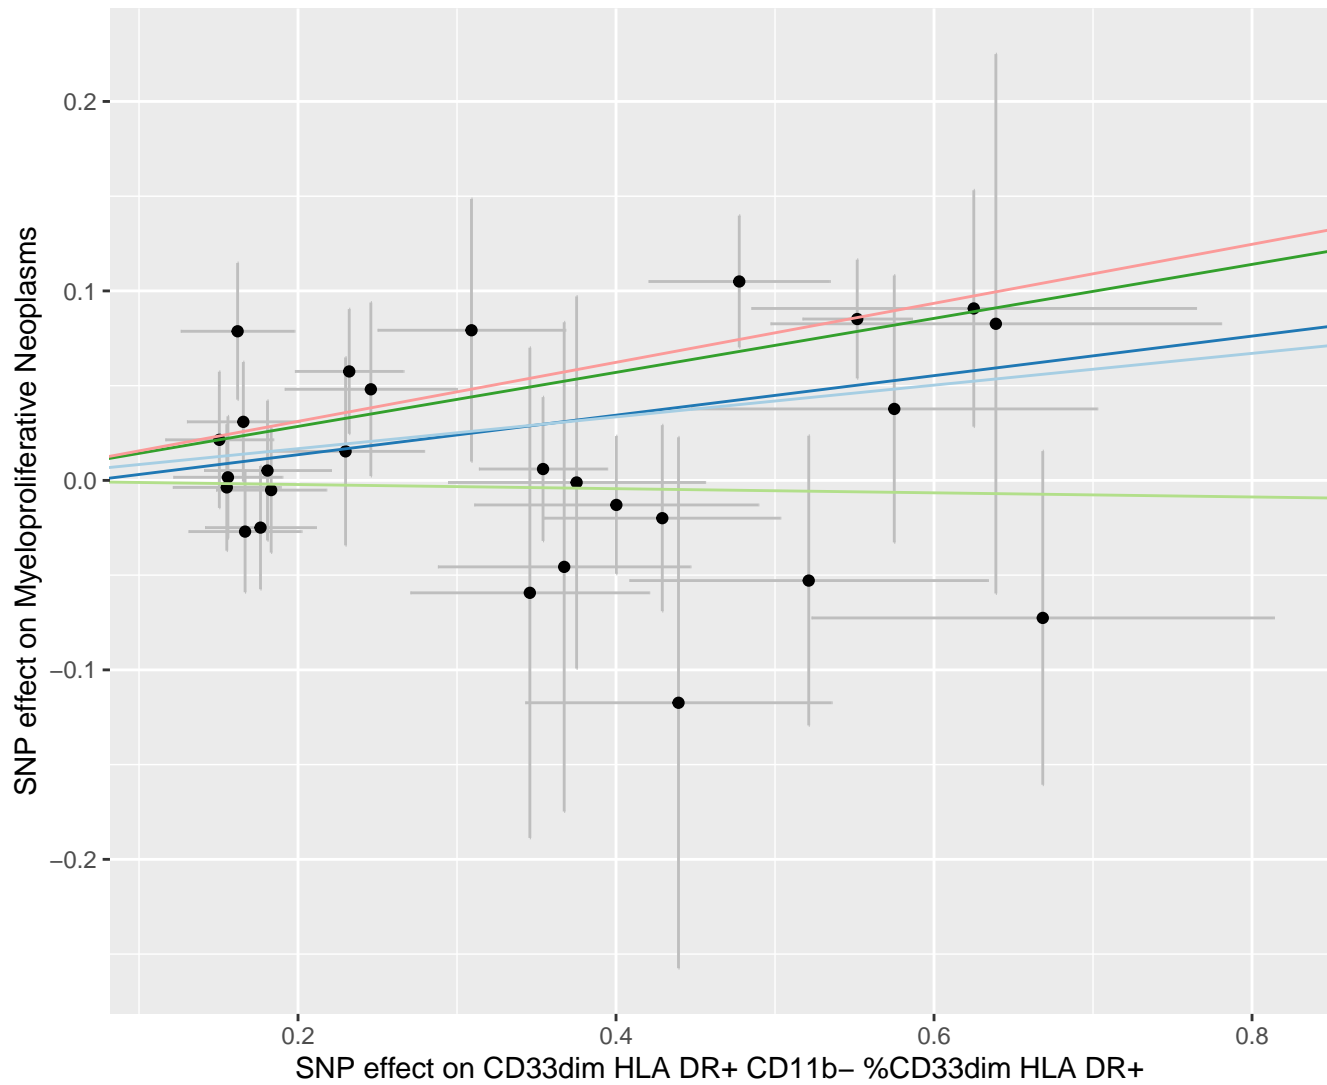

MR Test

- Inverse variance weighted (fixed effects)
- MR Egger
- Simple mode
- Weighted median
- Weighted mode

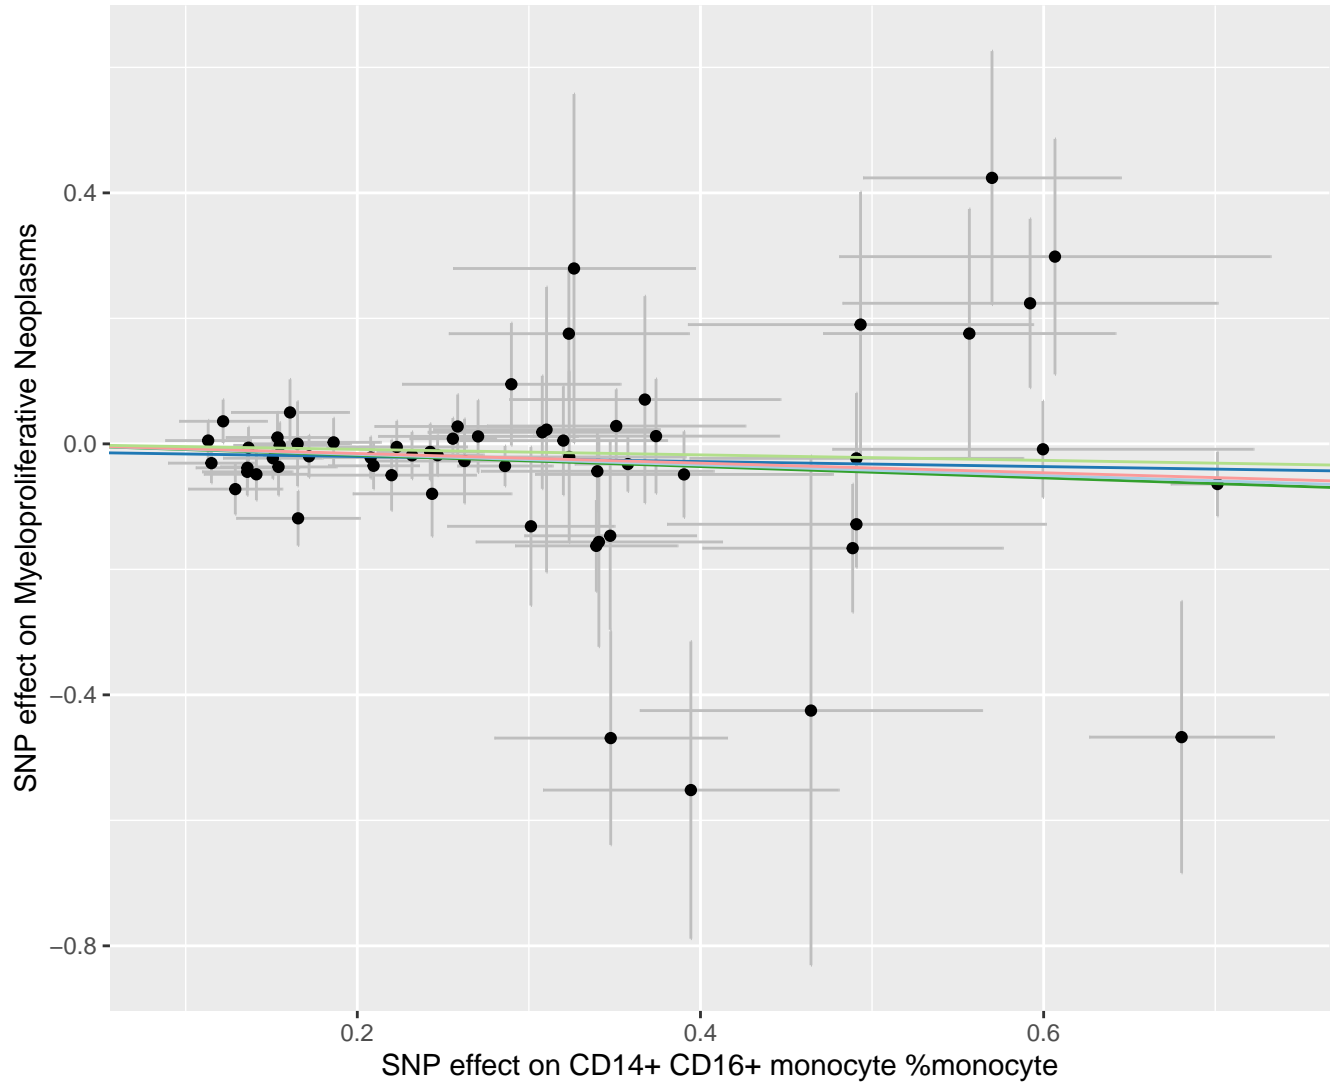

### MR Test

- Inverse variance weighted (fixed effects)
- MR Egger
- Simple mode
- Weighted median
- Weighted mode

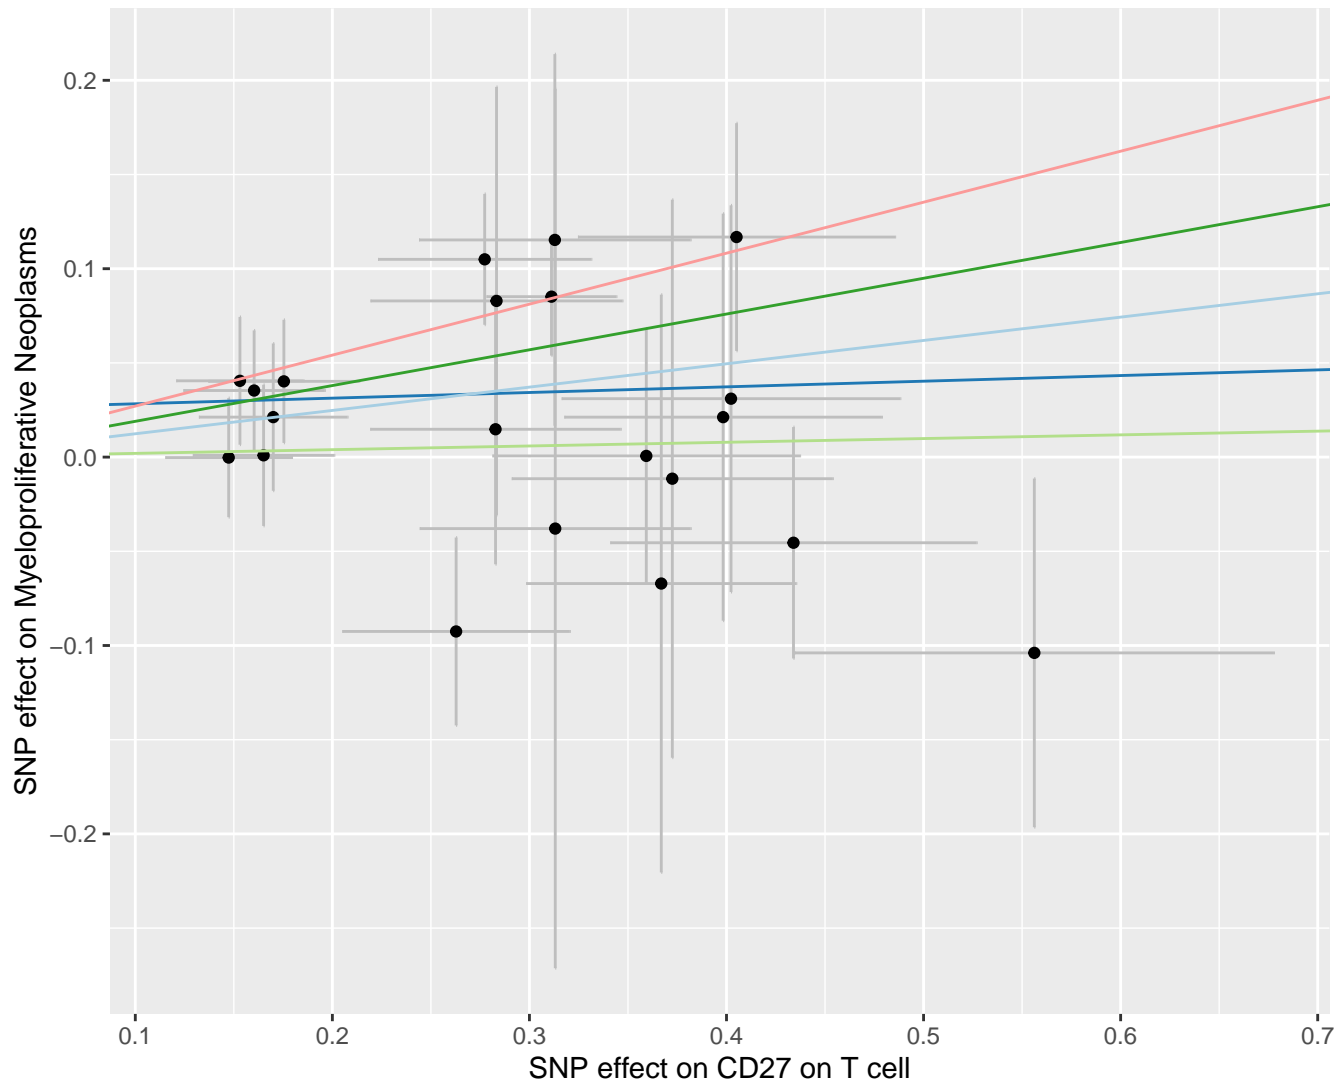

MR Test

- Inverse variance weighted (fixed effects)
- MR Egger
- Simple mode
- Weighted median
- Weighted mode

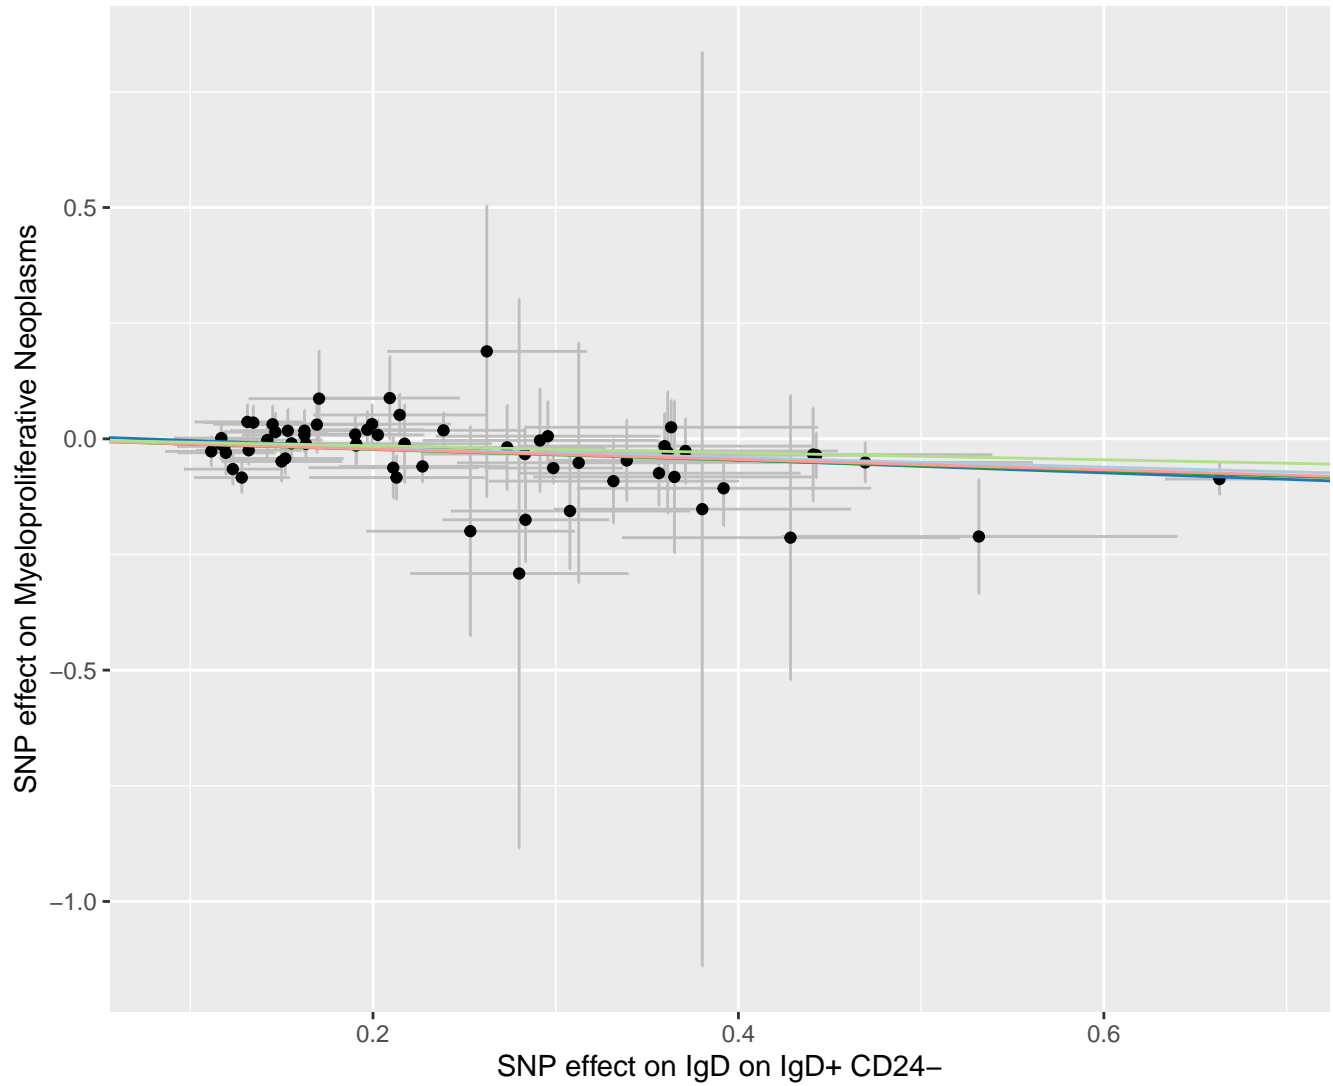

MR Test

- Inverse variance weighted (fixed effects)
- MR Egger
- Simple mode
- Weighted median
- Weighted mode

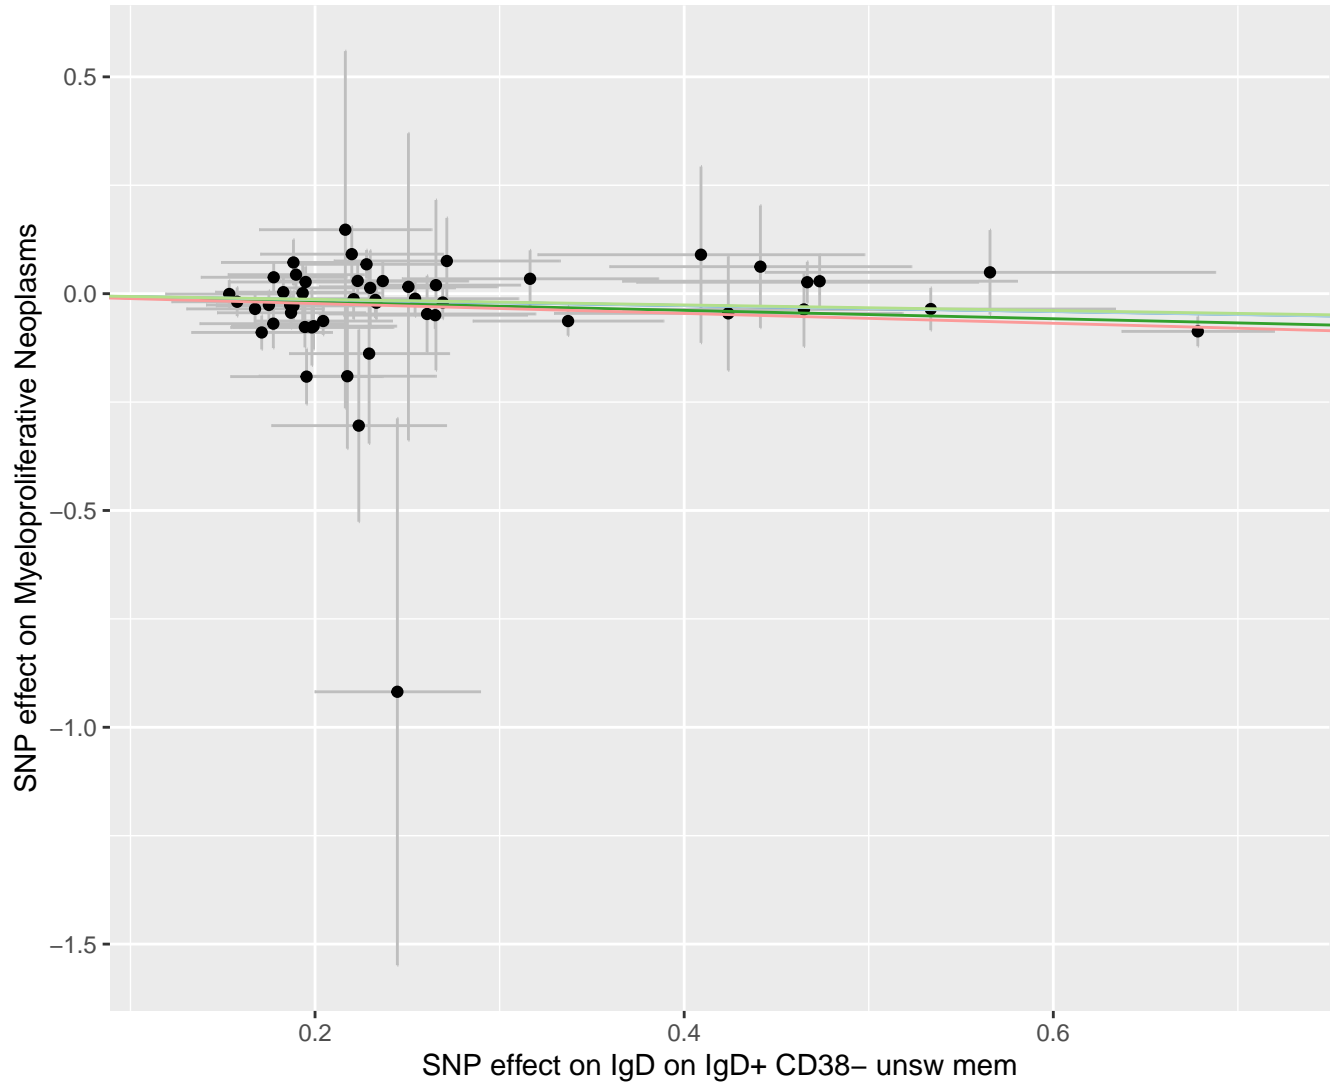

MR Test

- Inverse variance weighted (fixed effects)
- MR Egger
- Simple mode
- Weighted median
- Weighted mode

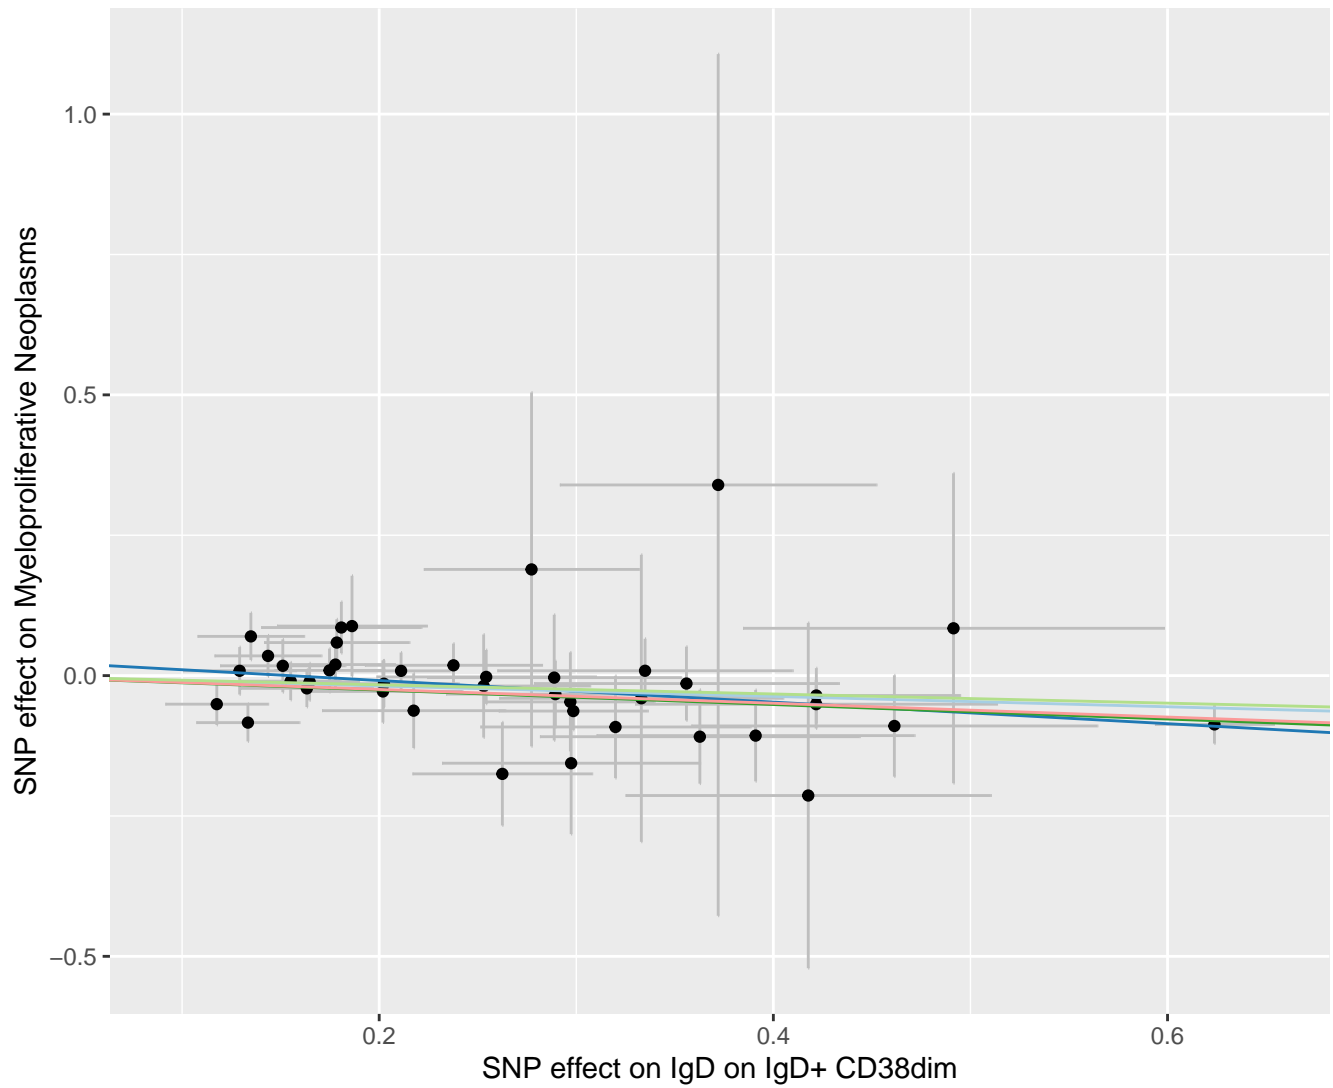

MR Test

- Inverse variance weighted (fixed effects)
- MR Egger
- Simple mode
- Weighted median
- Weighted mode

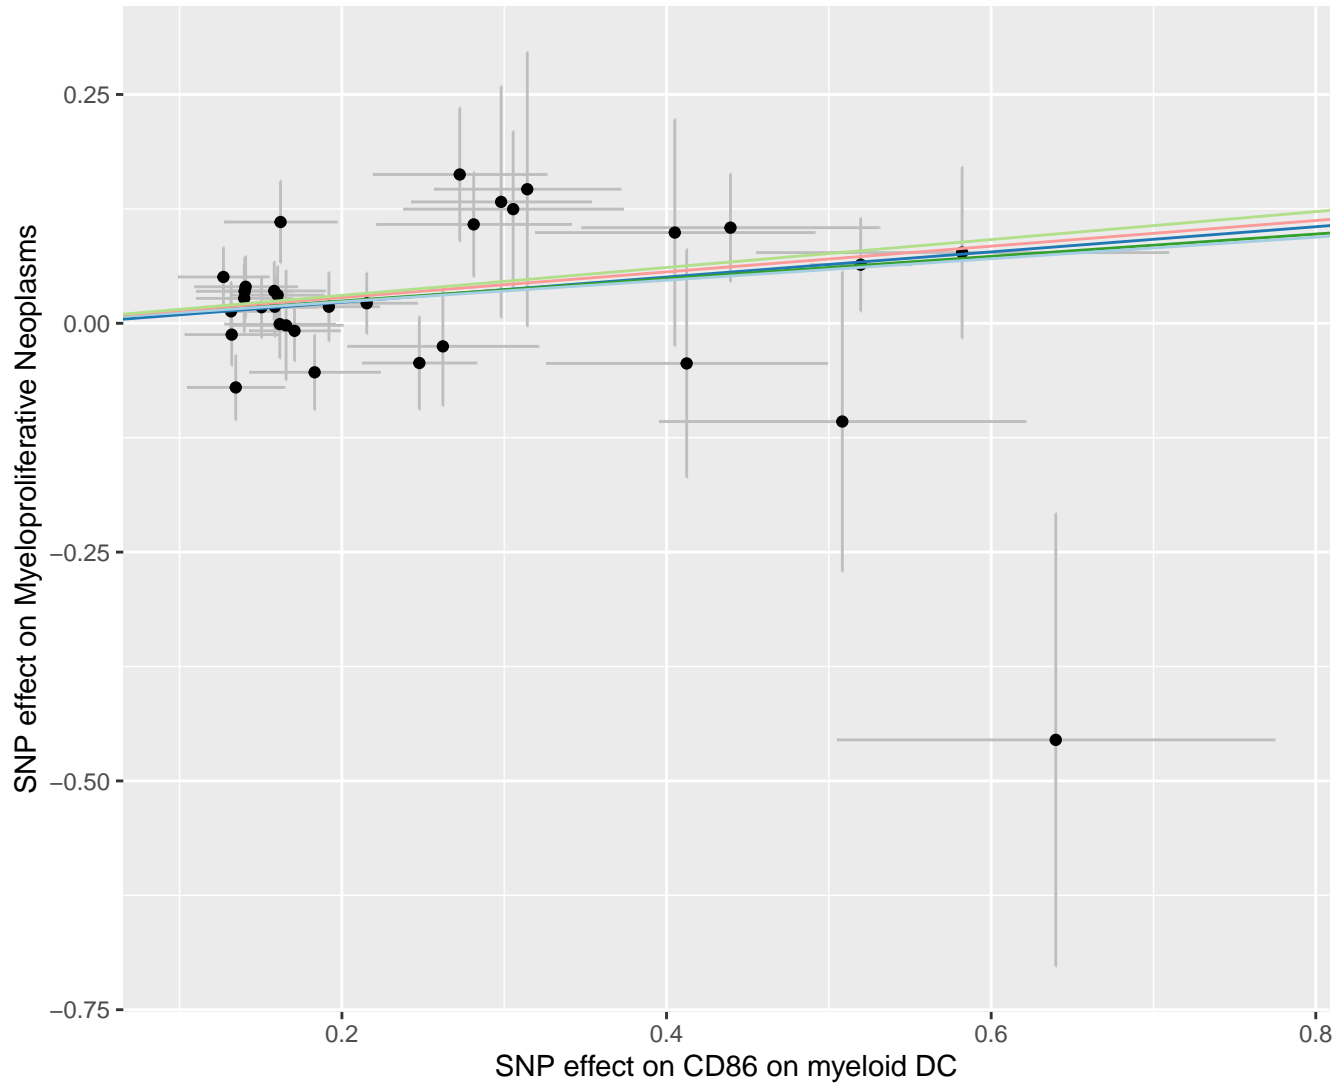



MR Test

- Inverse variance weighted (fixed effects)
- MR Egger
- Simple mode
- Weighted median
- Weighted mode

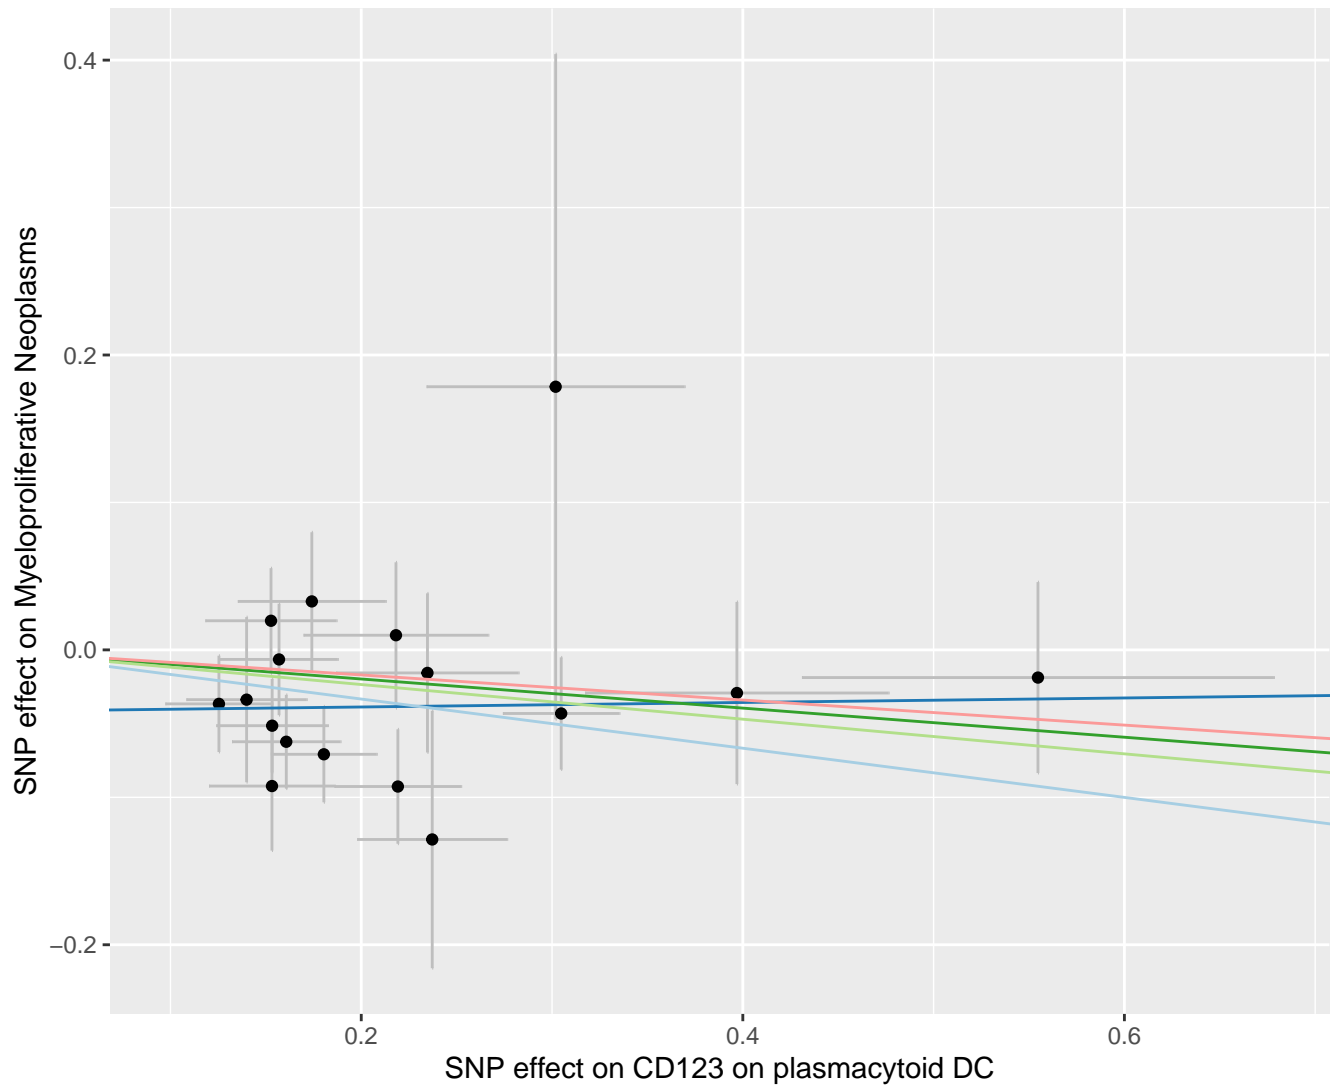

MR Test

- Inverse variance weighted (fixed effects)
- MR Egger
- Simple mode
- Weighted median
- Weighted mode

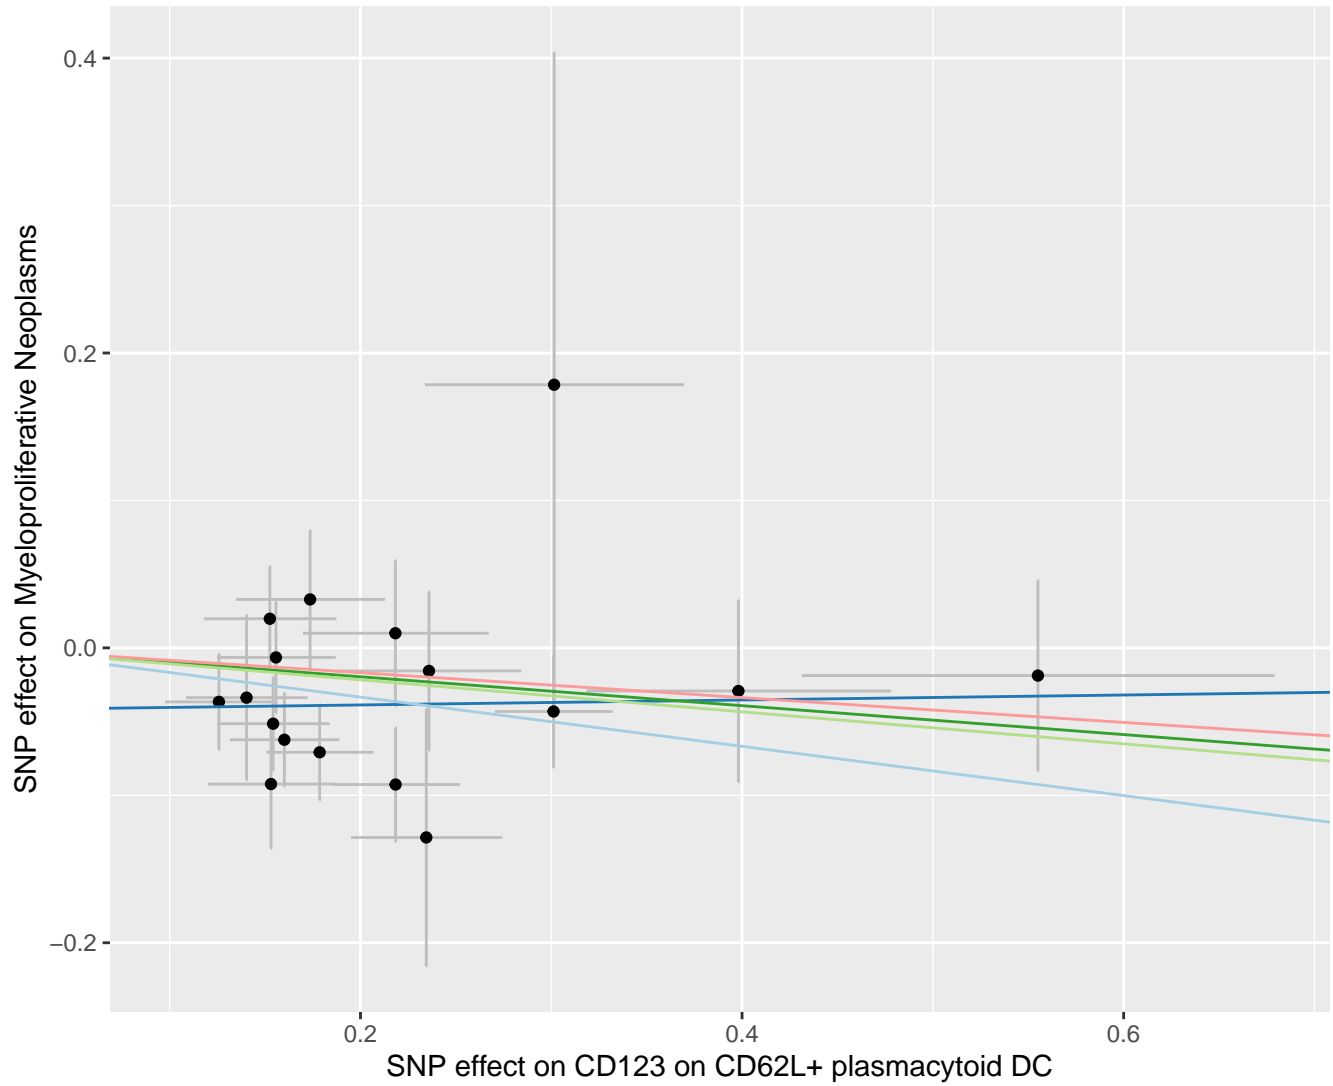

### MR Test

- Inverse variance weighted (fixed effects)
- MR Egger
- Simple mode
- Weighted median
- Weighted mode

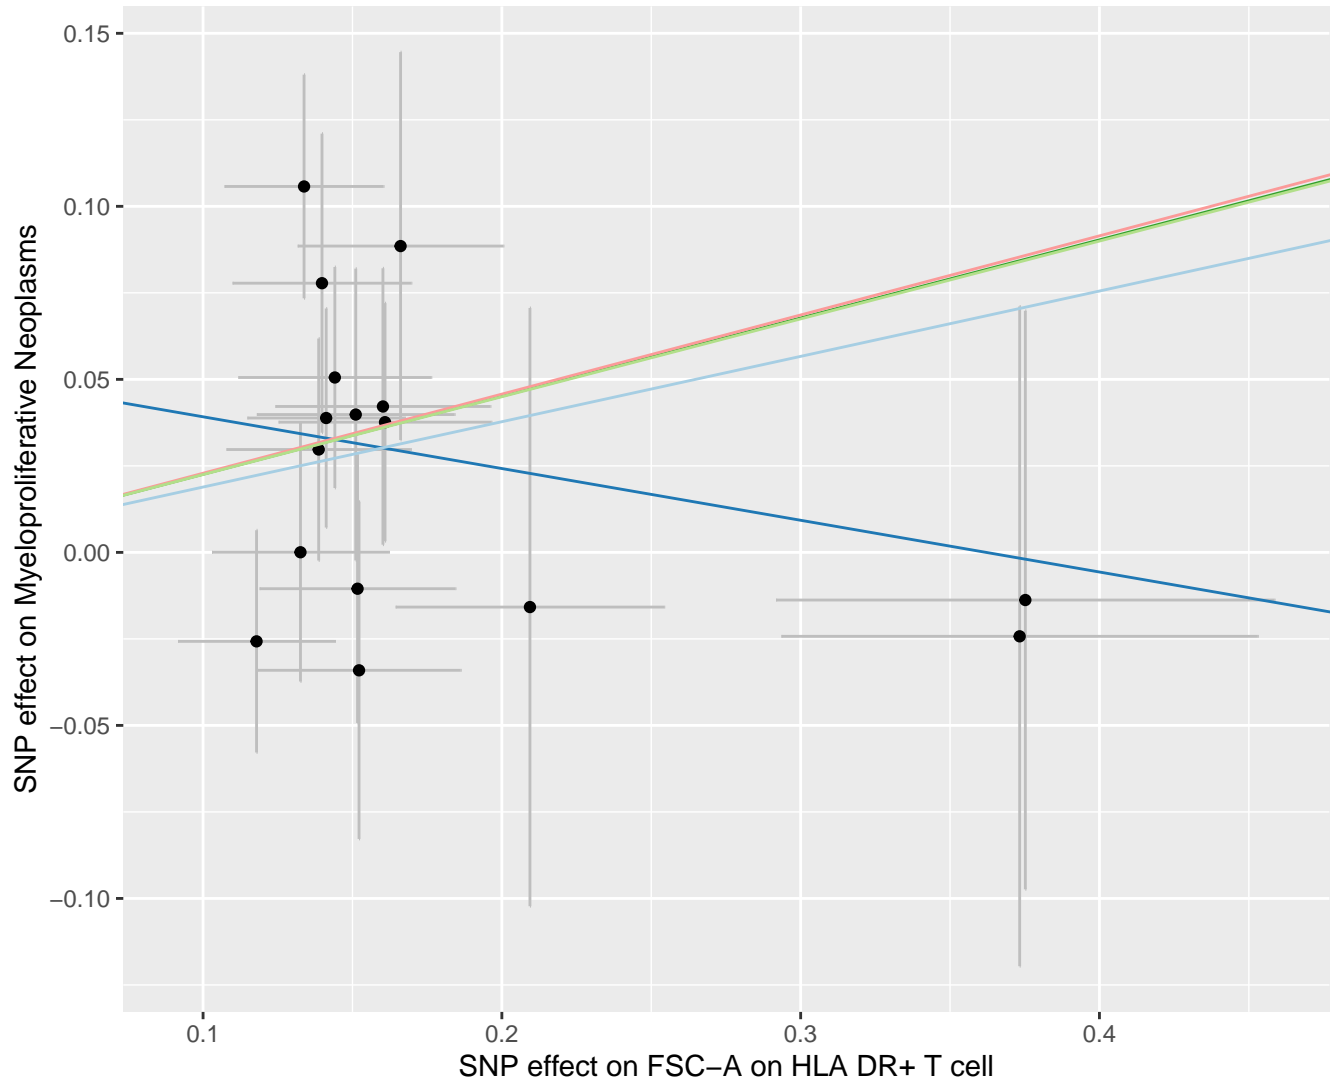

MR Test

- Inverse variance weighted (fixed effects)
- MR Egger
- Simple mode
- Weighted median
- Weighted mode

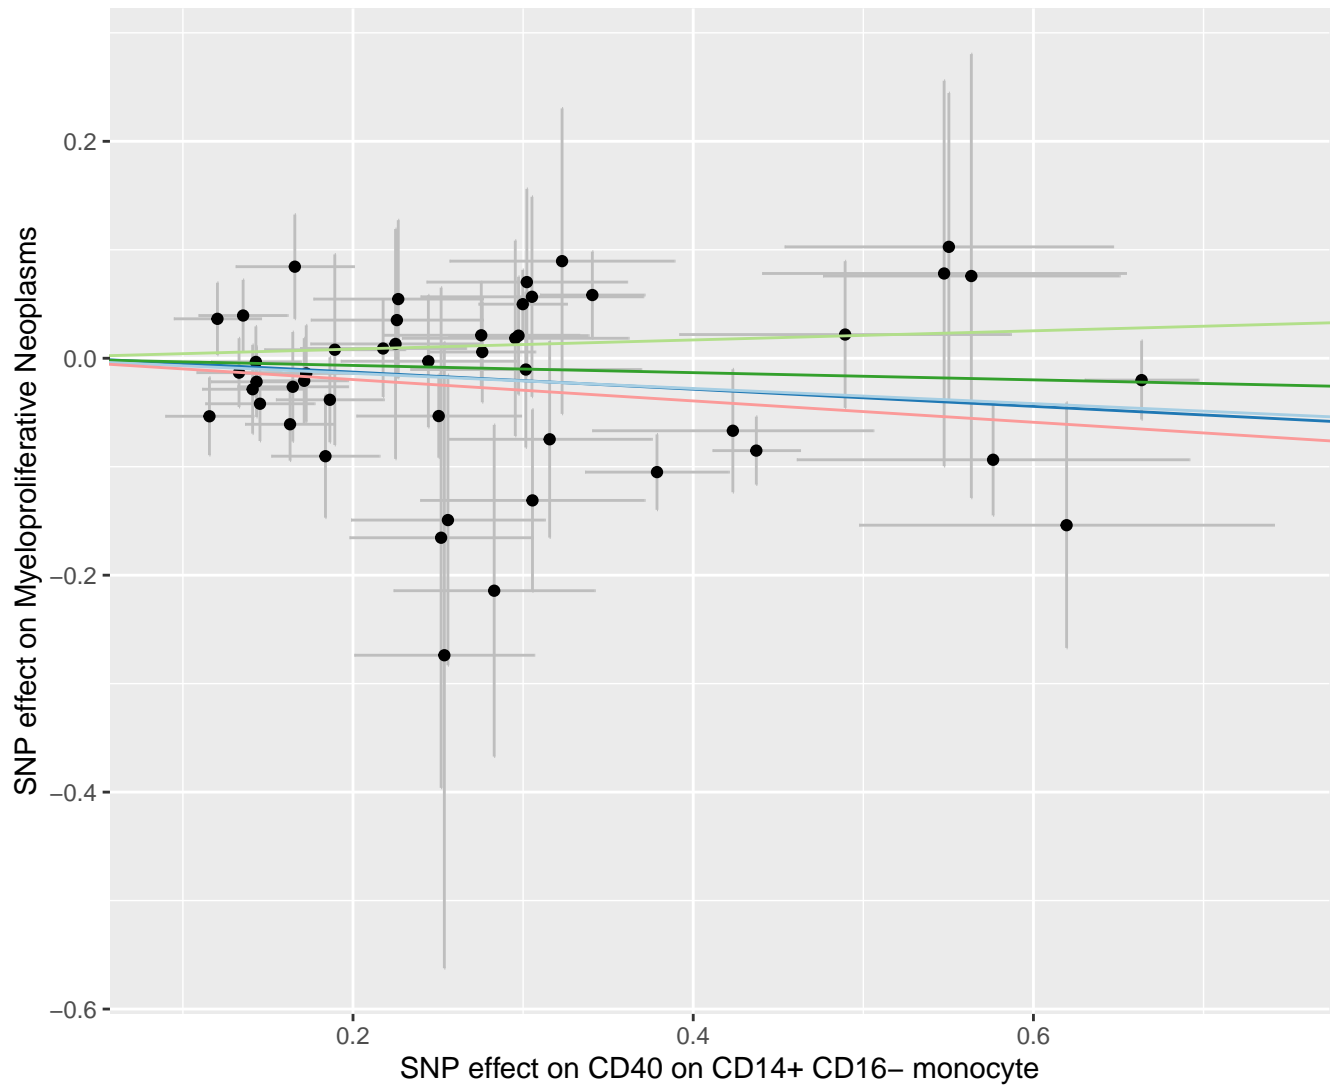

MR Test

- Inverse variance weighted (fixed effects)
- MR Egger
- Simple mode
- Weighted median
- Weighted mode

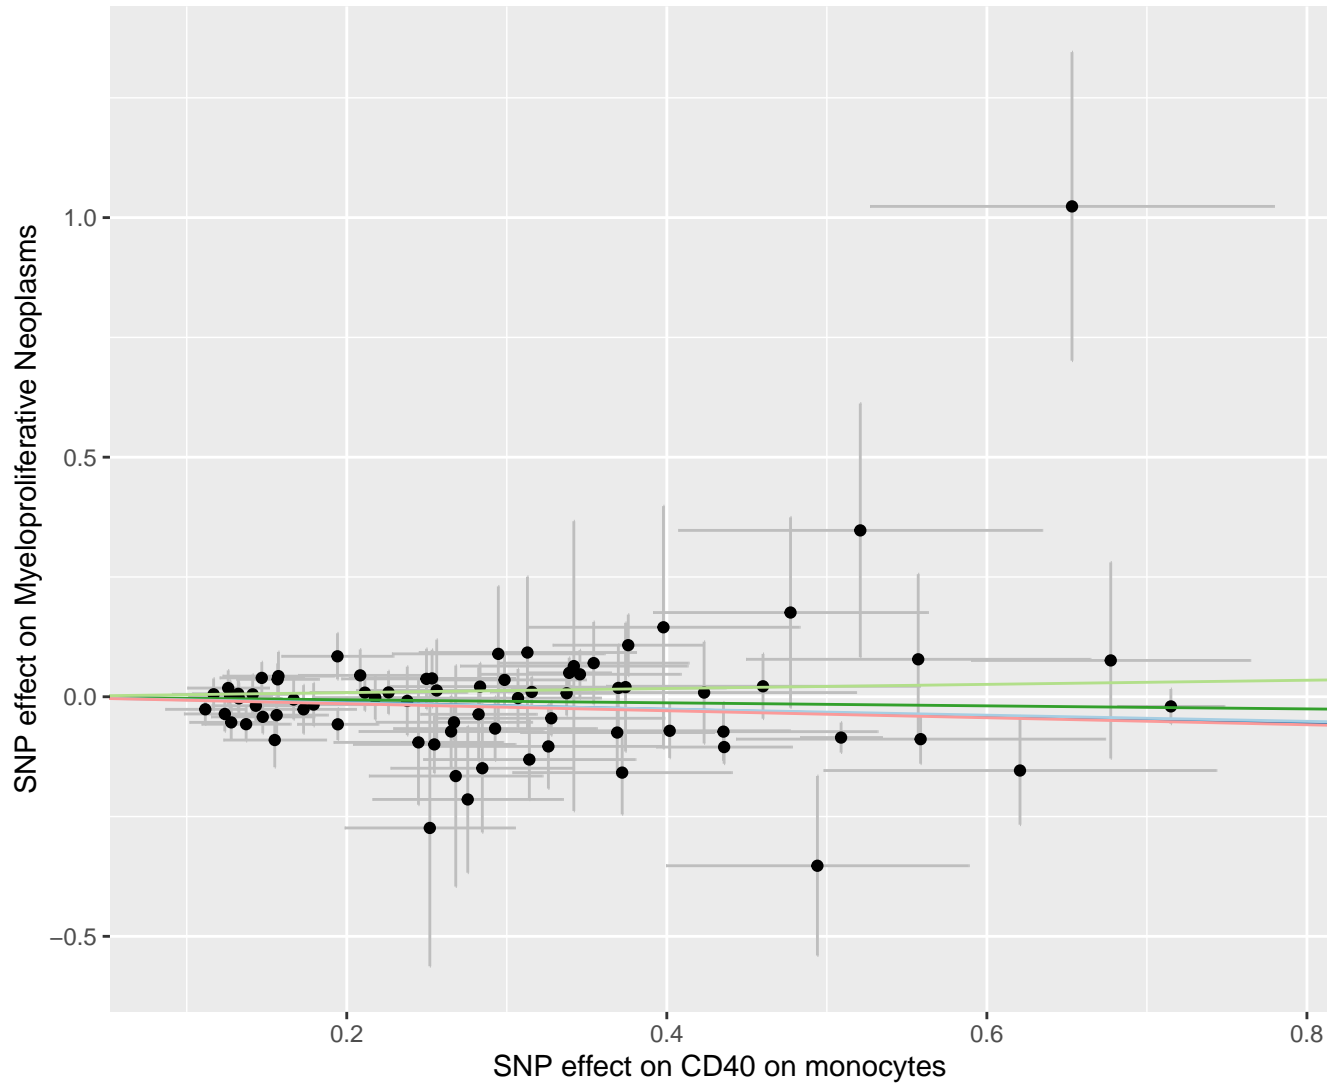

MR Test

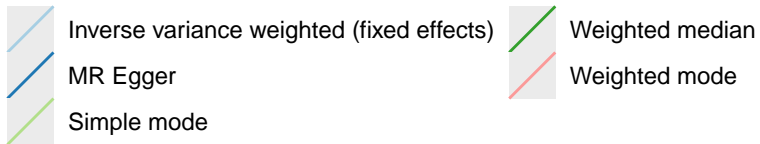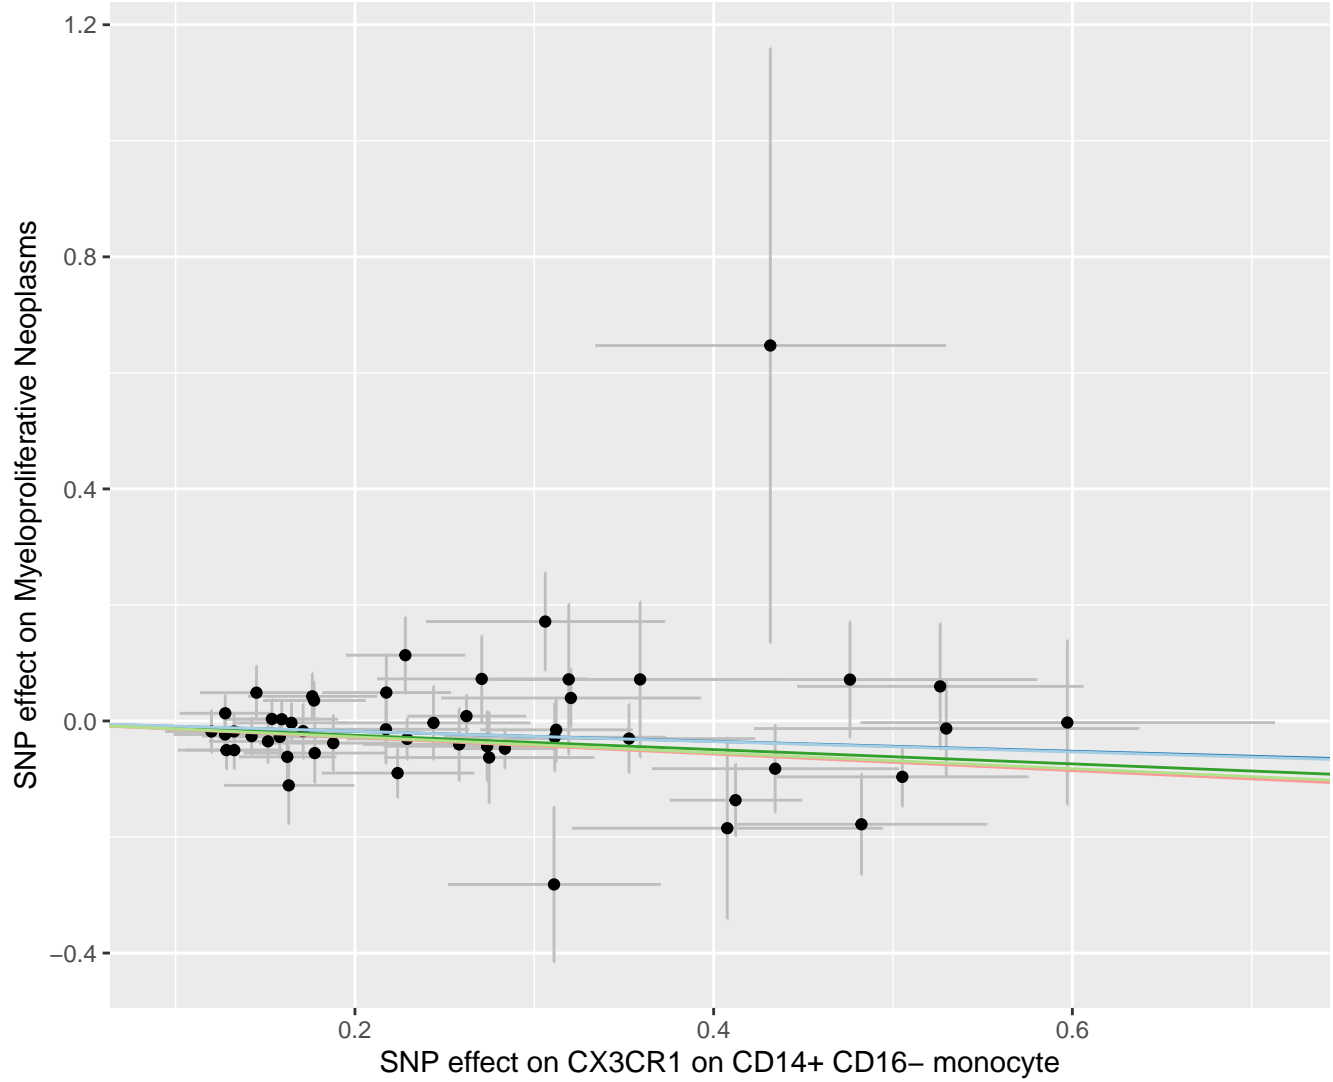

MR Test

- Inverse variance weighted (fixed effects)
- MR Egger
- Simple mode
- Weighted median
- Weighted mode

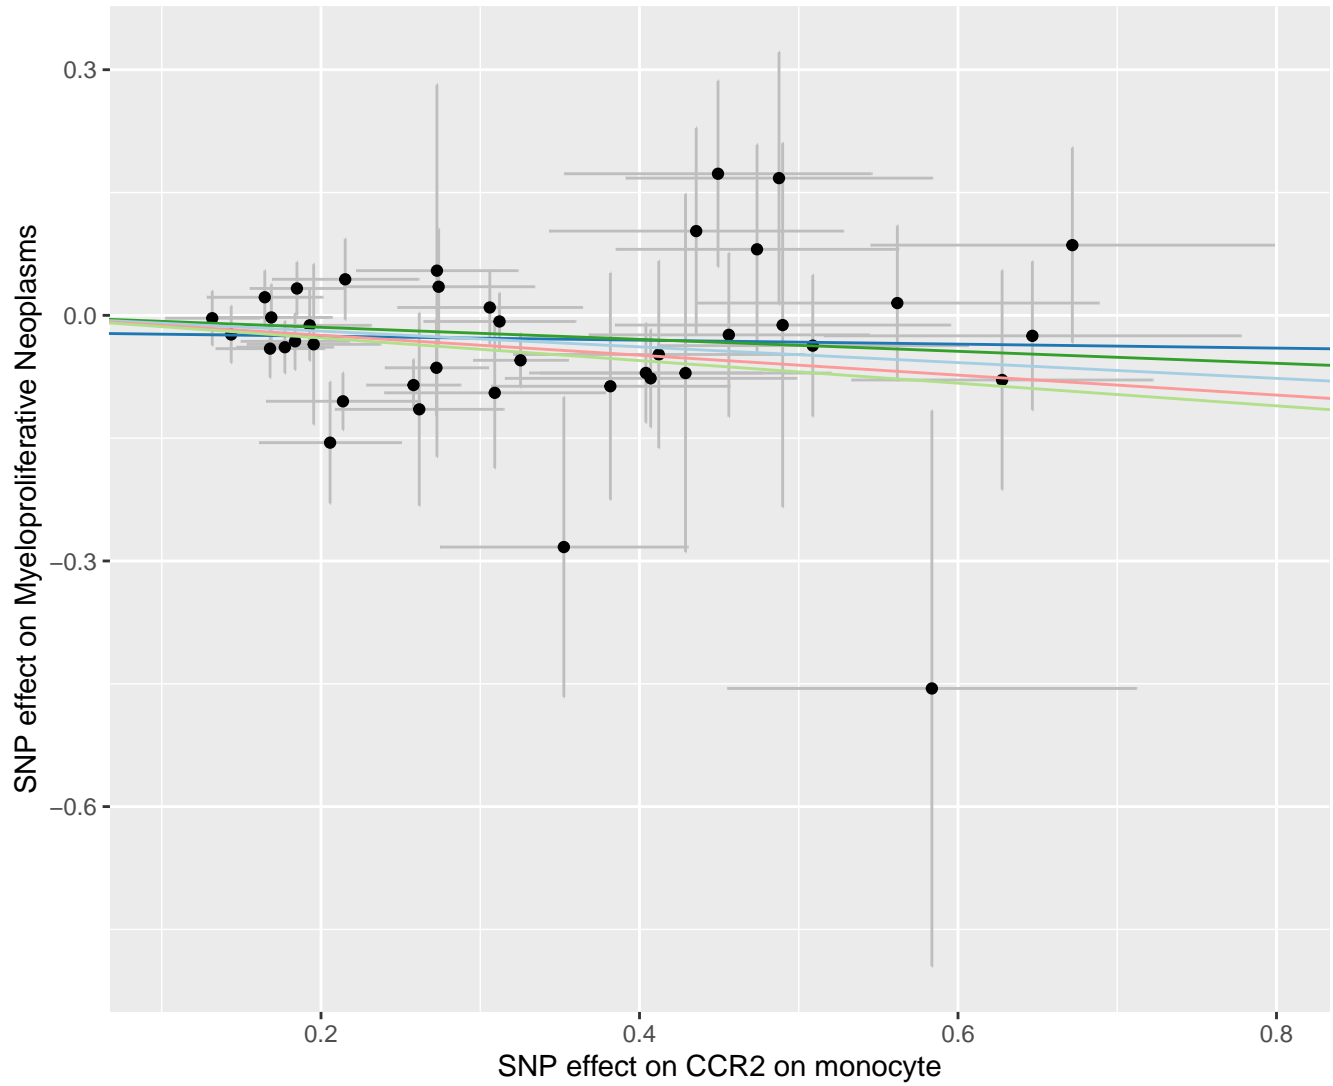

MR Test

- Inverse variance weighted (fixed effects)
- MR Egger
- Simple mode
- Weighted median
- Weighted mode

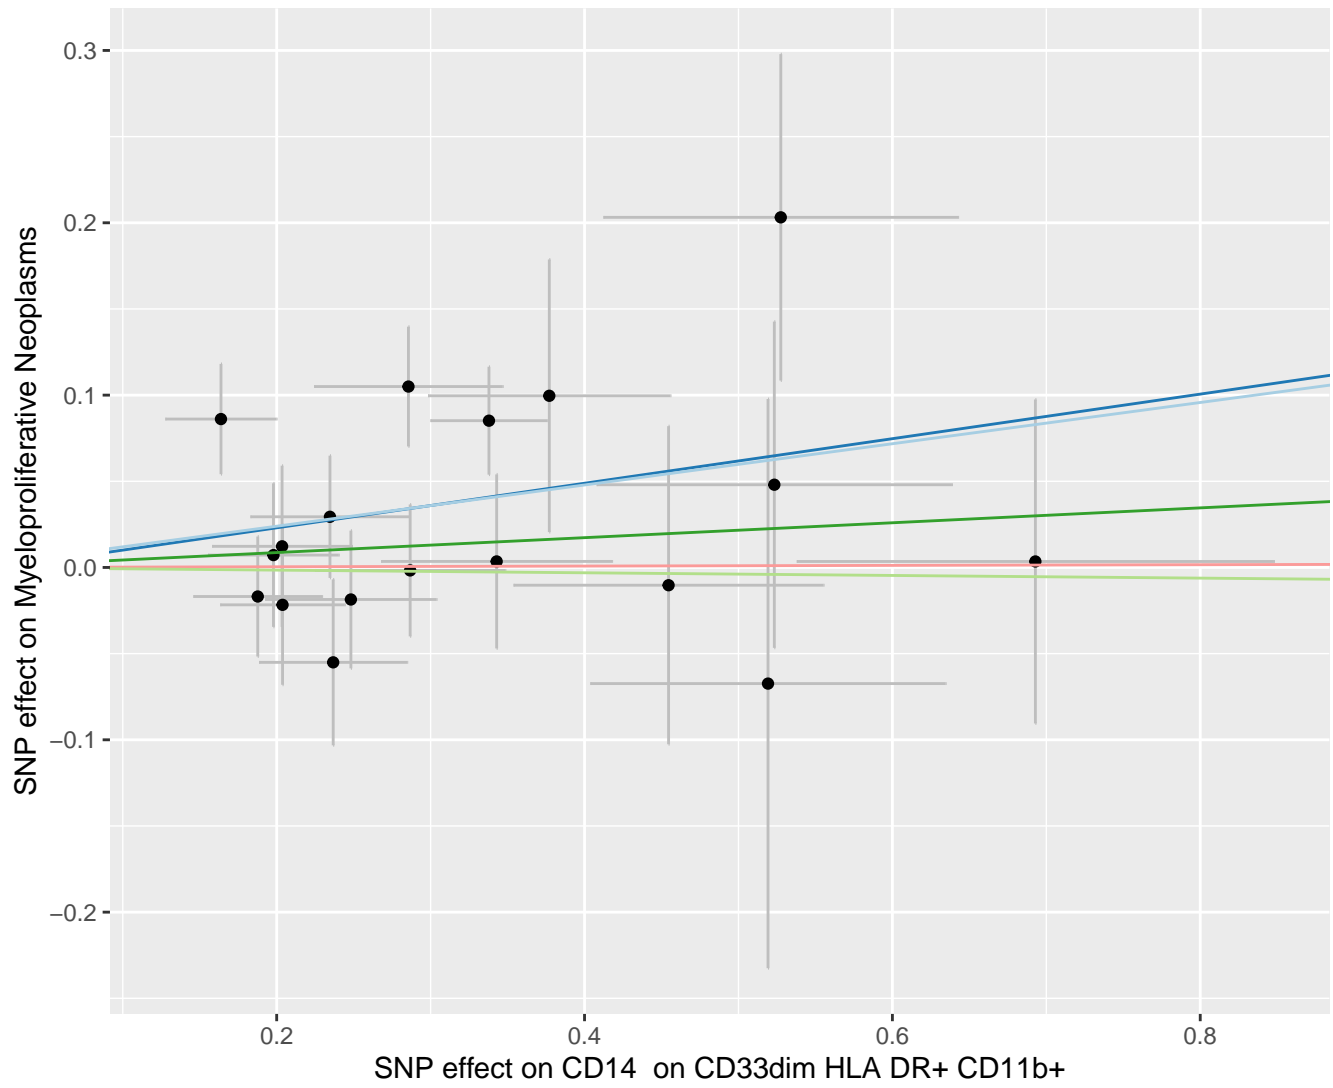



MR Test

- Inverse variance weighted (fixed effects)
- MR Egger
- Simple mode
- Weighted median
- Weighted mode

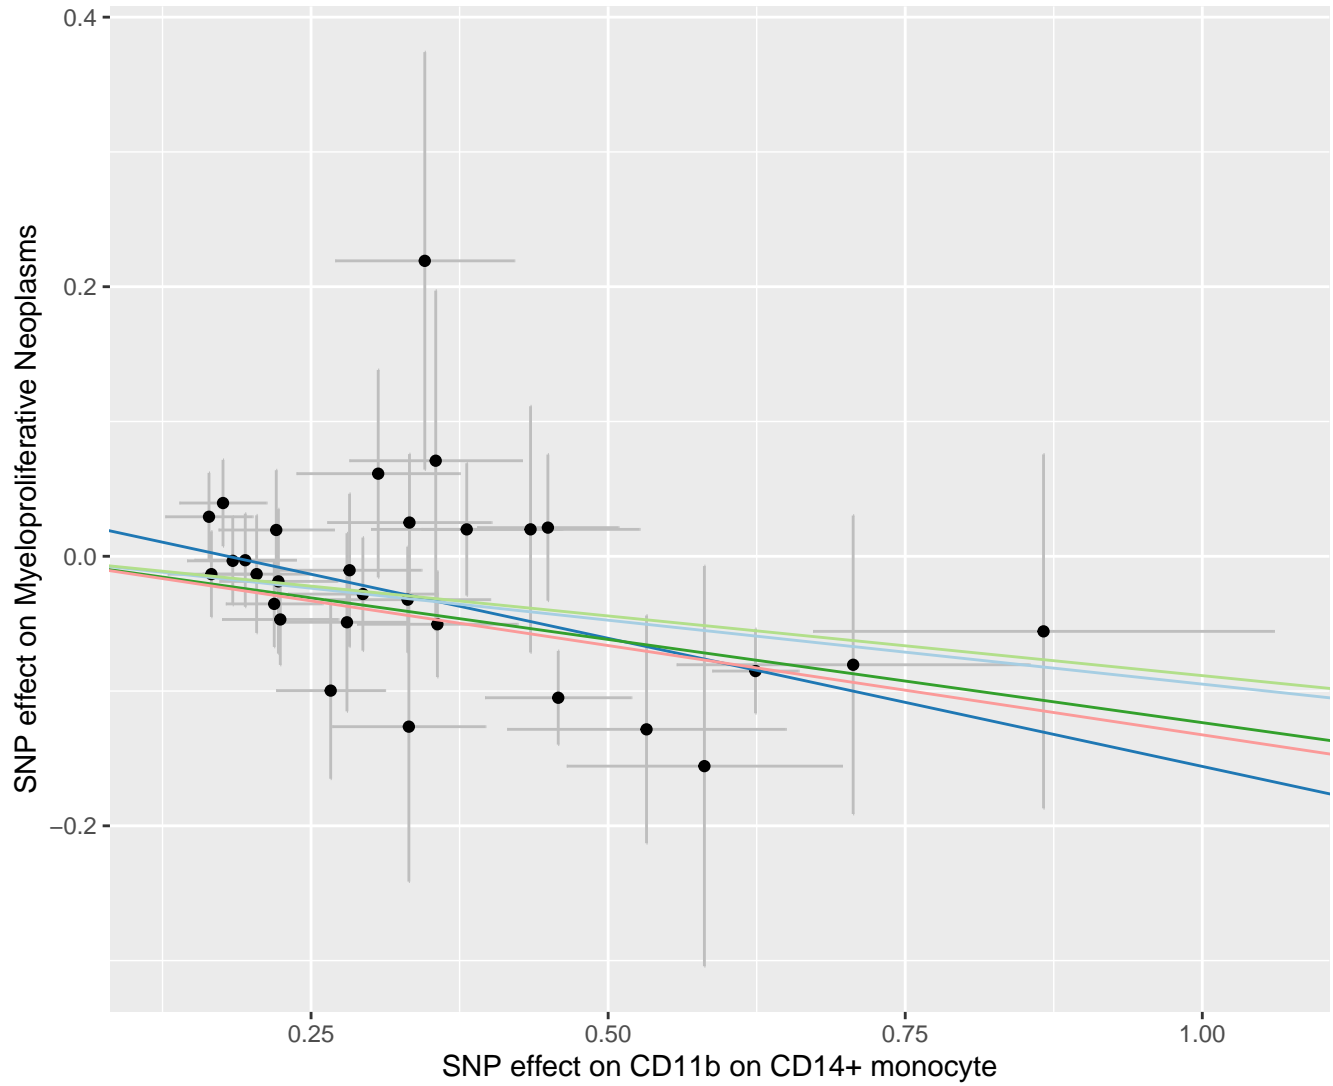

Supplement: medi-103-e40945-s003.pdf [file medi-103-e40945-s003.pdf]
