# Supplementary material for: Causal relationship between 731 immune cells and the risk of myeloproliferative neoplasms: A 2-sample bidirectional Mendelian randomization study
Source: PubMed Central journal article supplement — Medicine (Baltimore). 2024 Dec 20;103(51):e40945. doi: 10.1097/MD.0000000000040945 (PMC11666147; doi:10.1097/md.0000000000040945), 2024-12-20

### MR Method

- Inverse variance weighted
- MR Egger

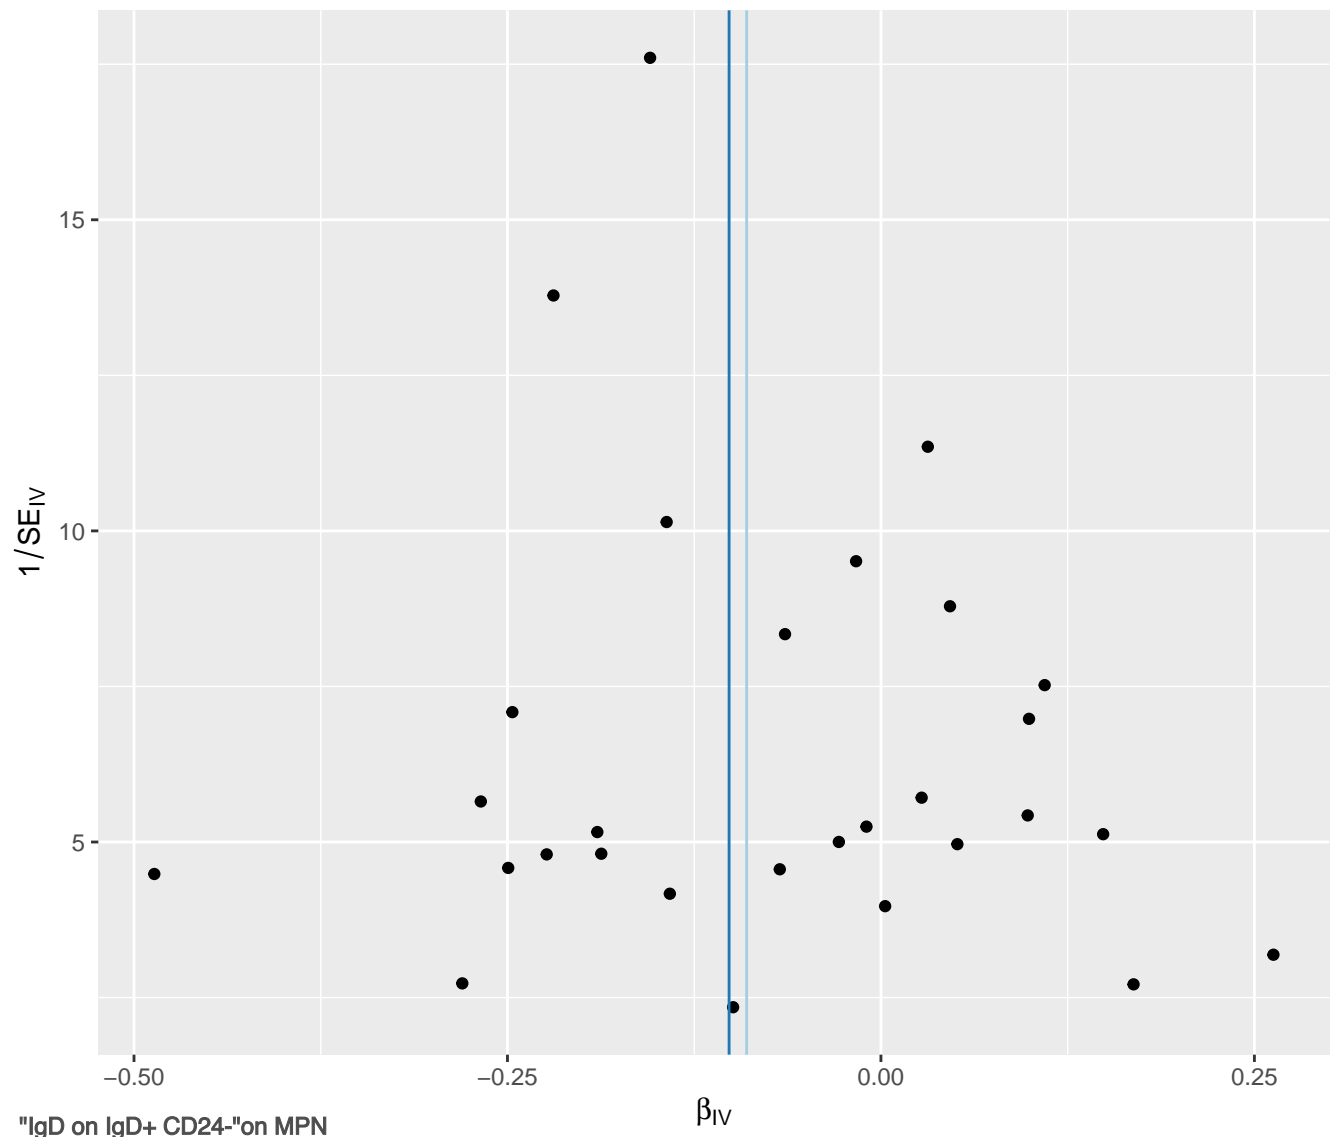

### MR Method

- Inverse variance weighted
- MR Egger

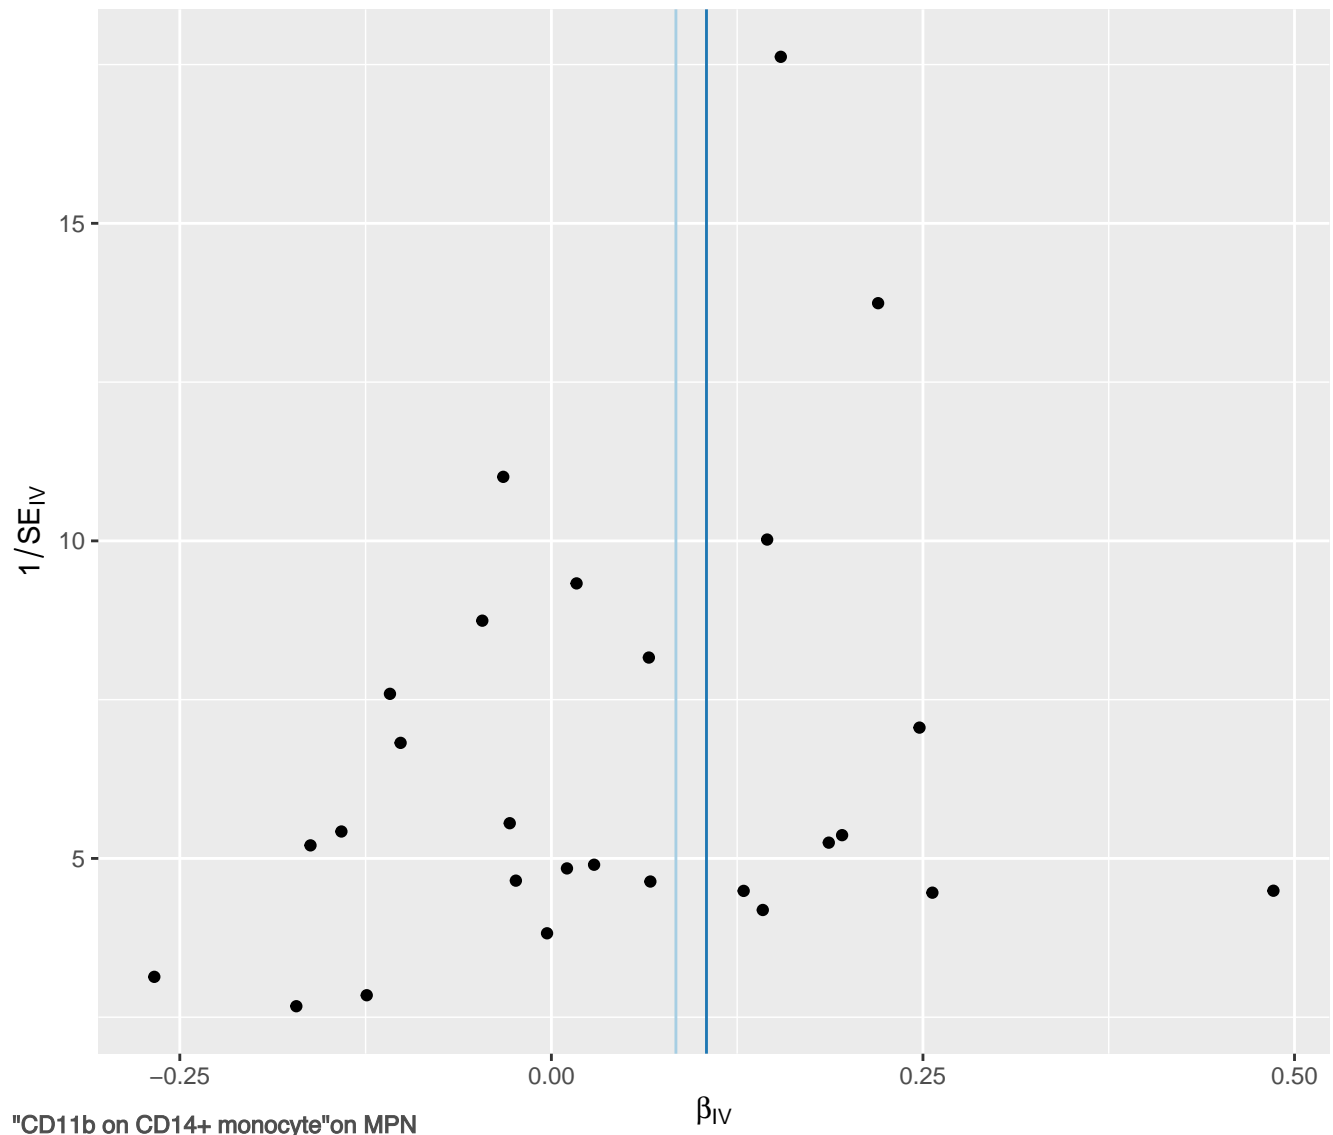

### MR Method

- Inverse variance weighted
- MR Egger

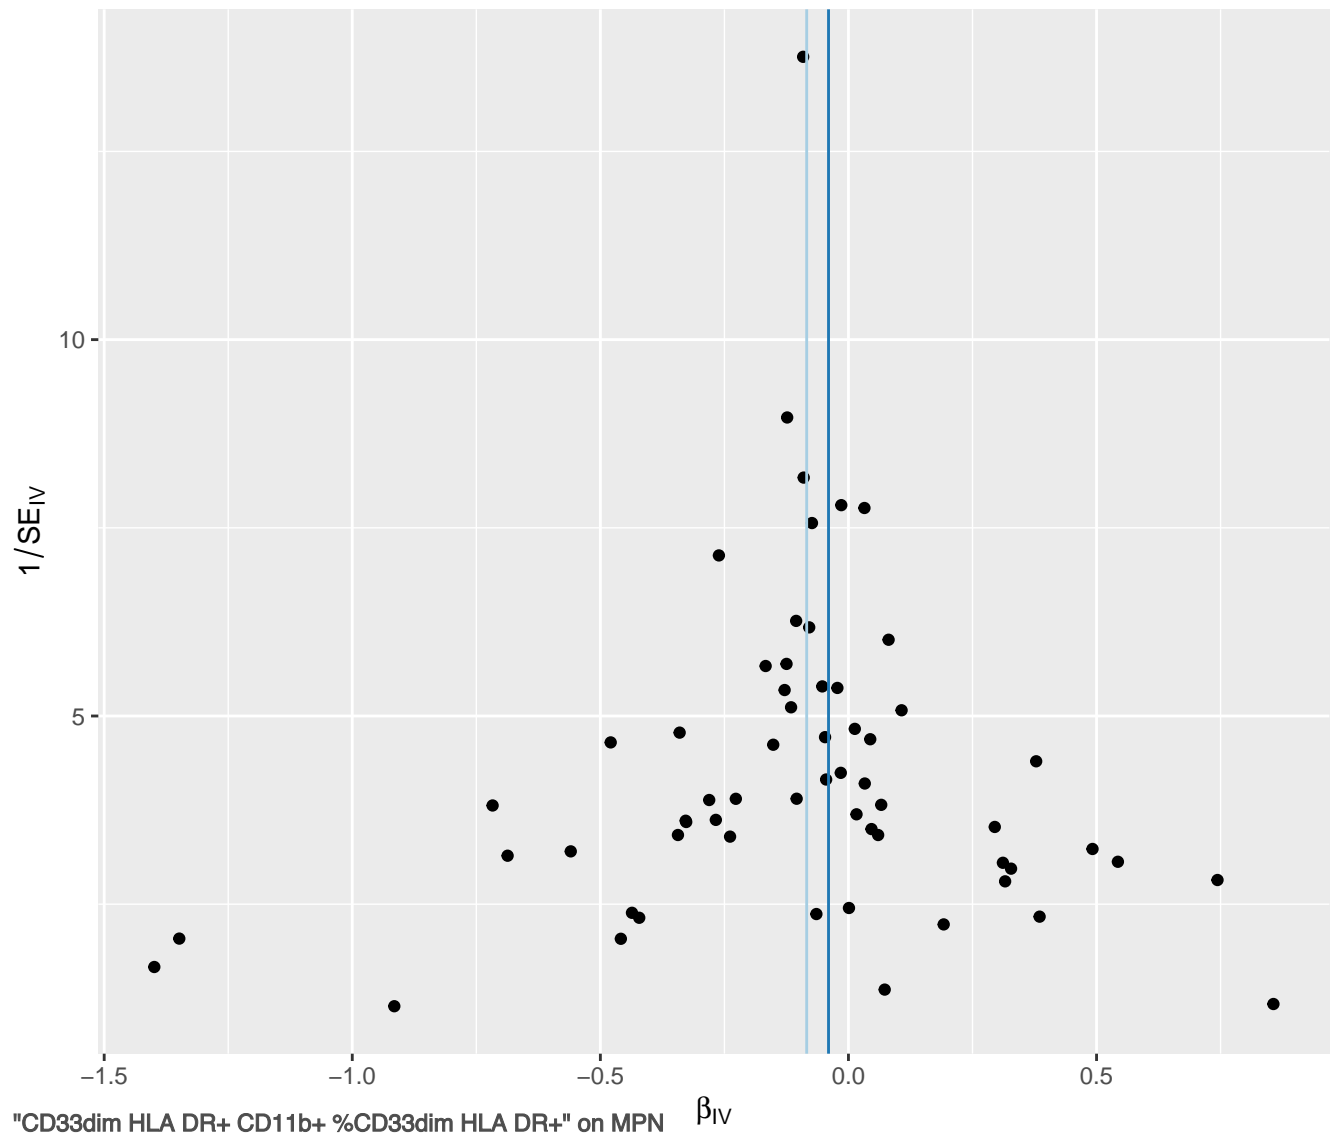

### MR Method

- Inverse variance weighted
- MR Egger

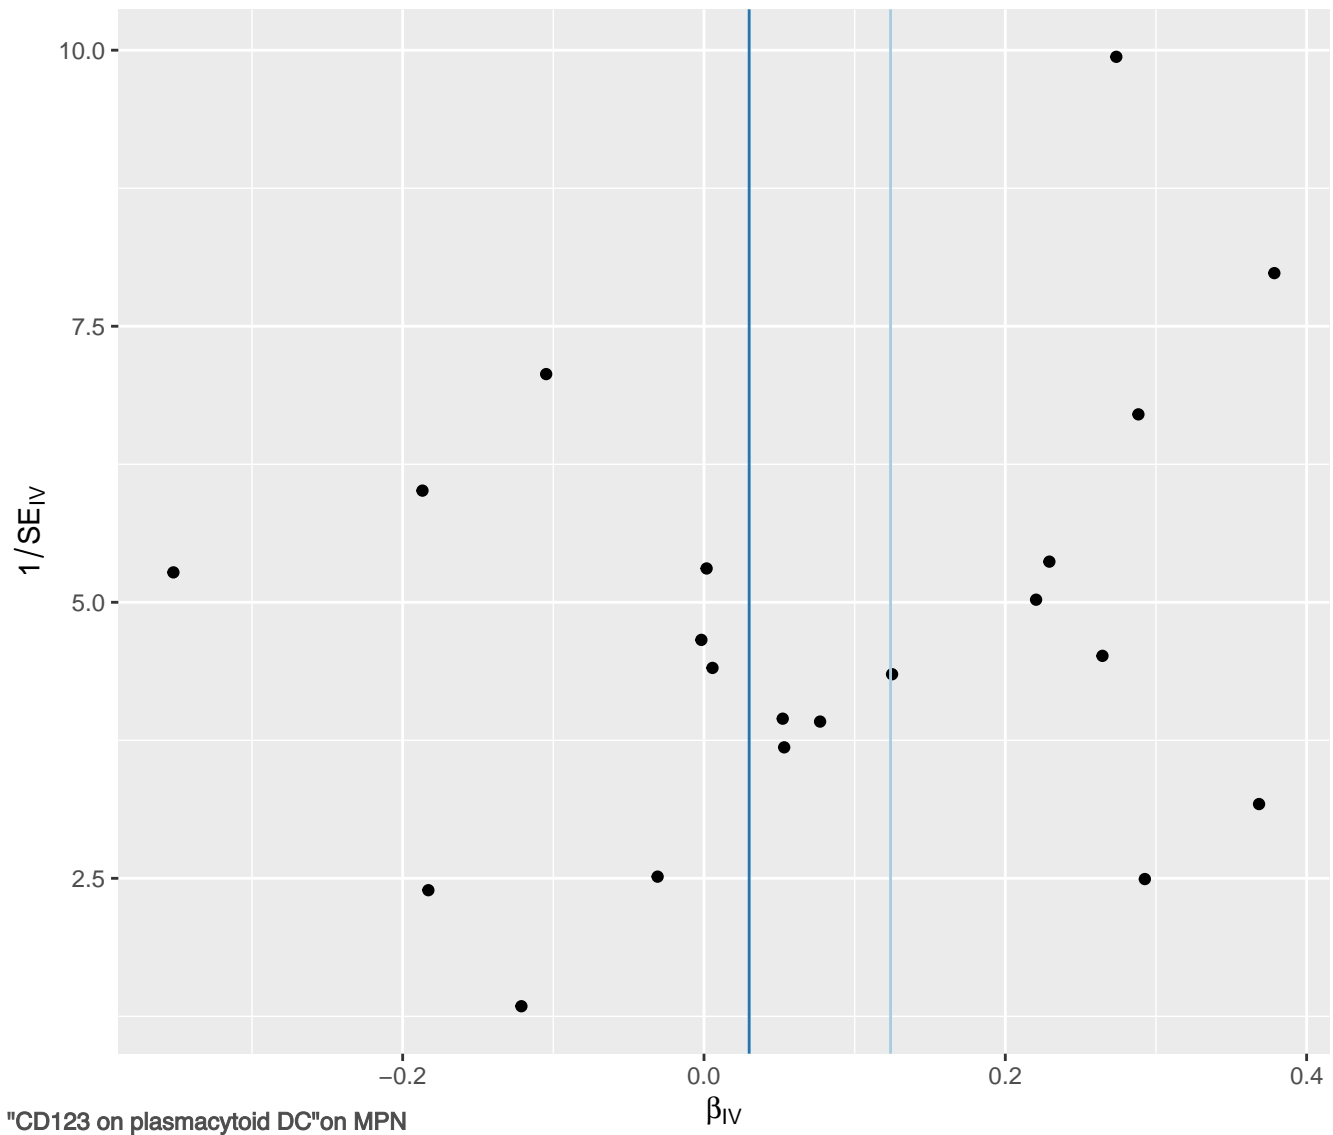

### MR Method

- Inverse variance weighted
- MR Egger

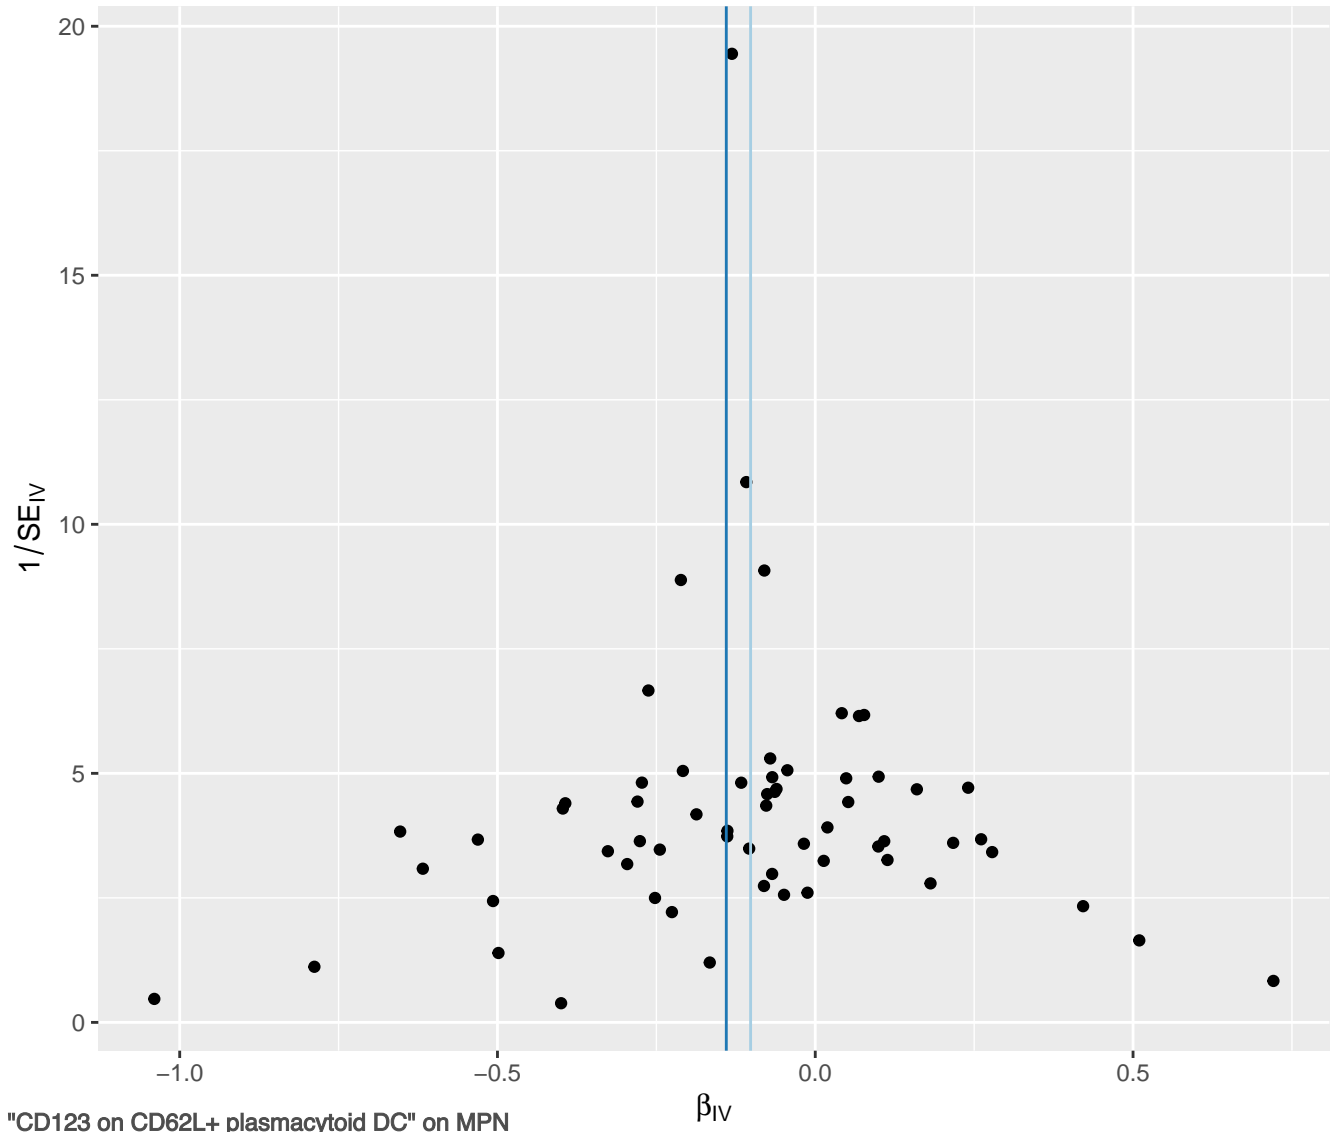

### MR Method

- Inverse variance weighted
- MR Egger

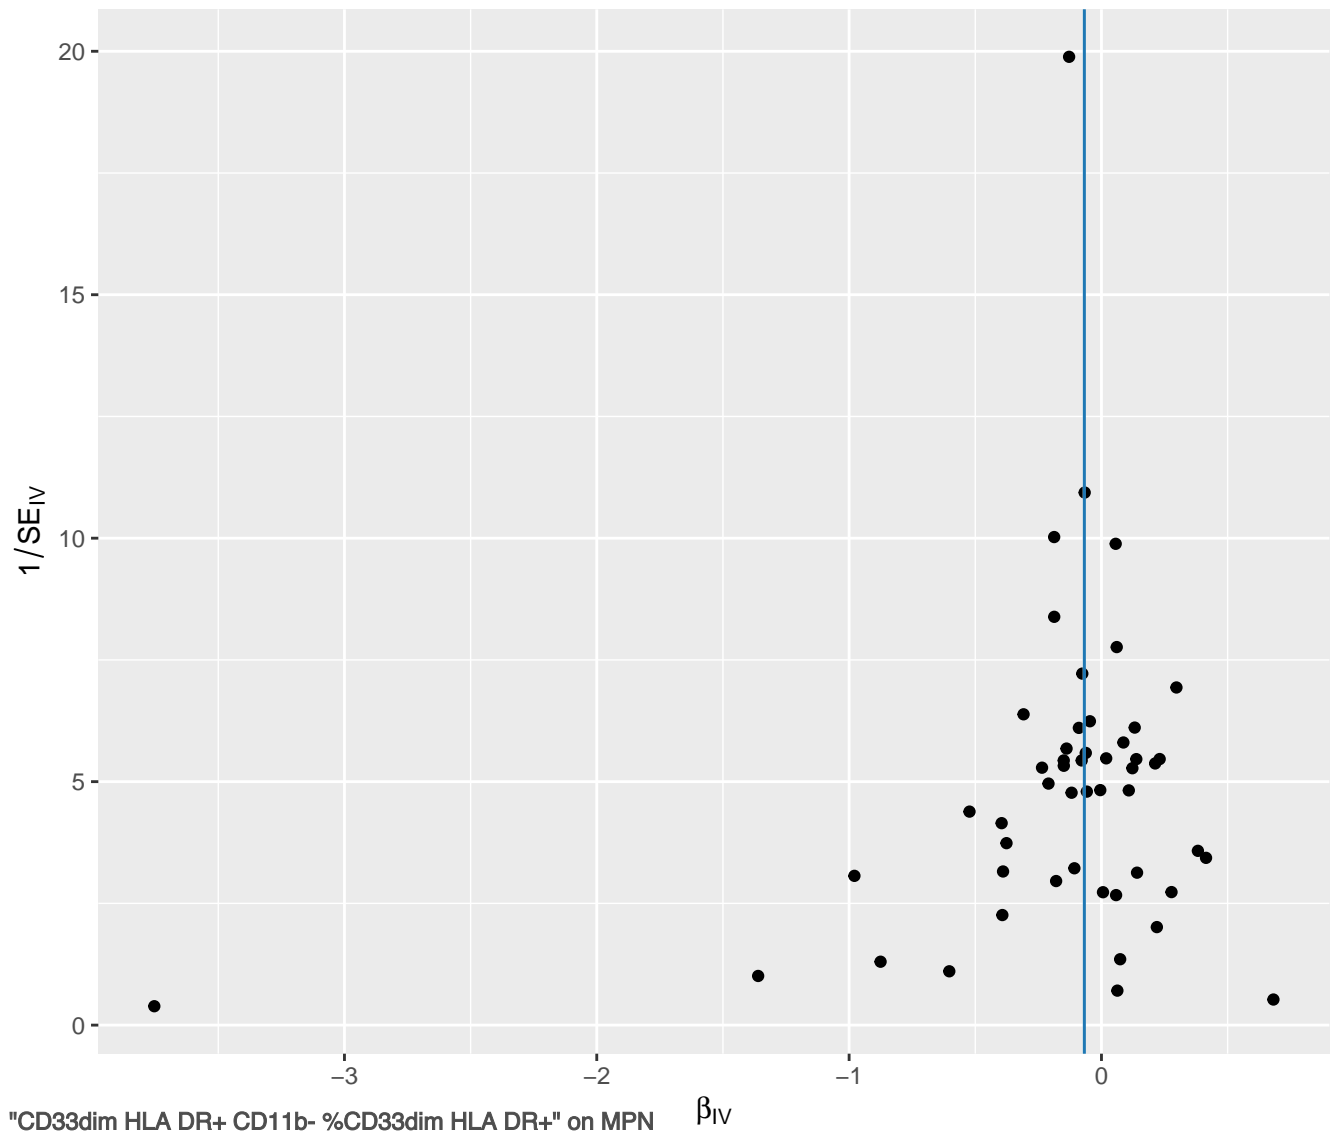

### MR Method

- Inverse variance weighted
- MR Egger

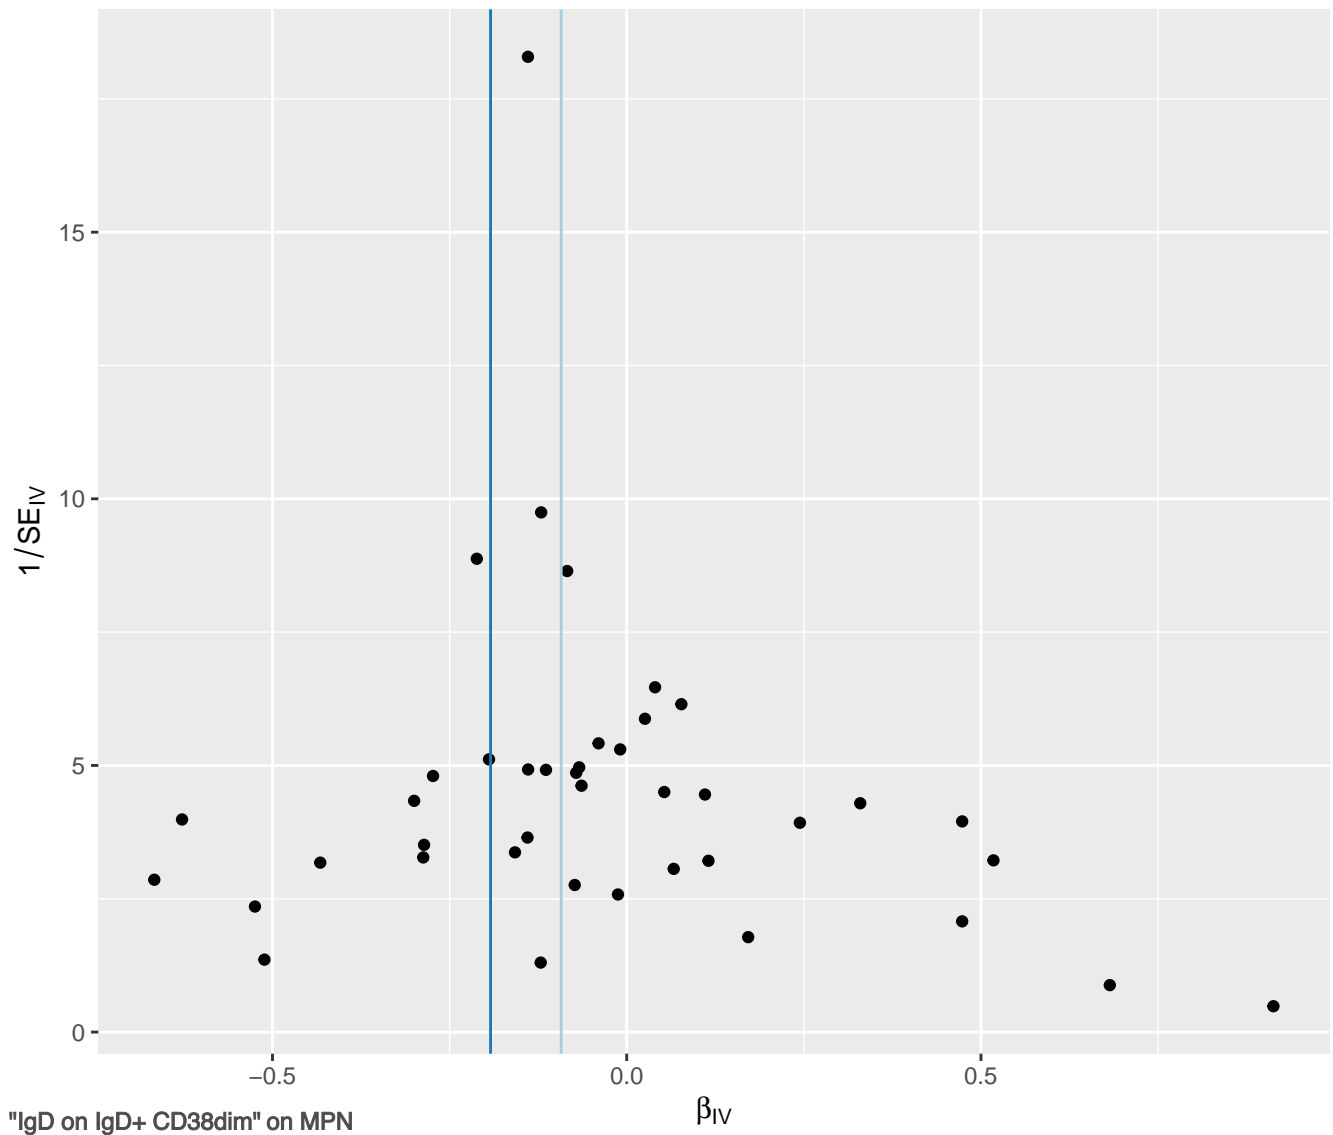

### MR Method

- Inverse variance weighted
- MR Egger

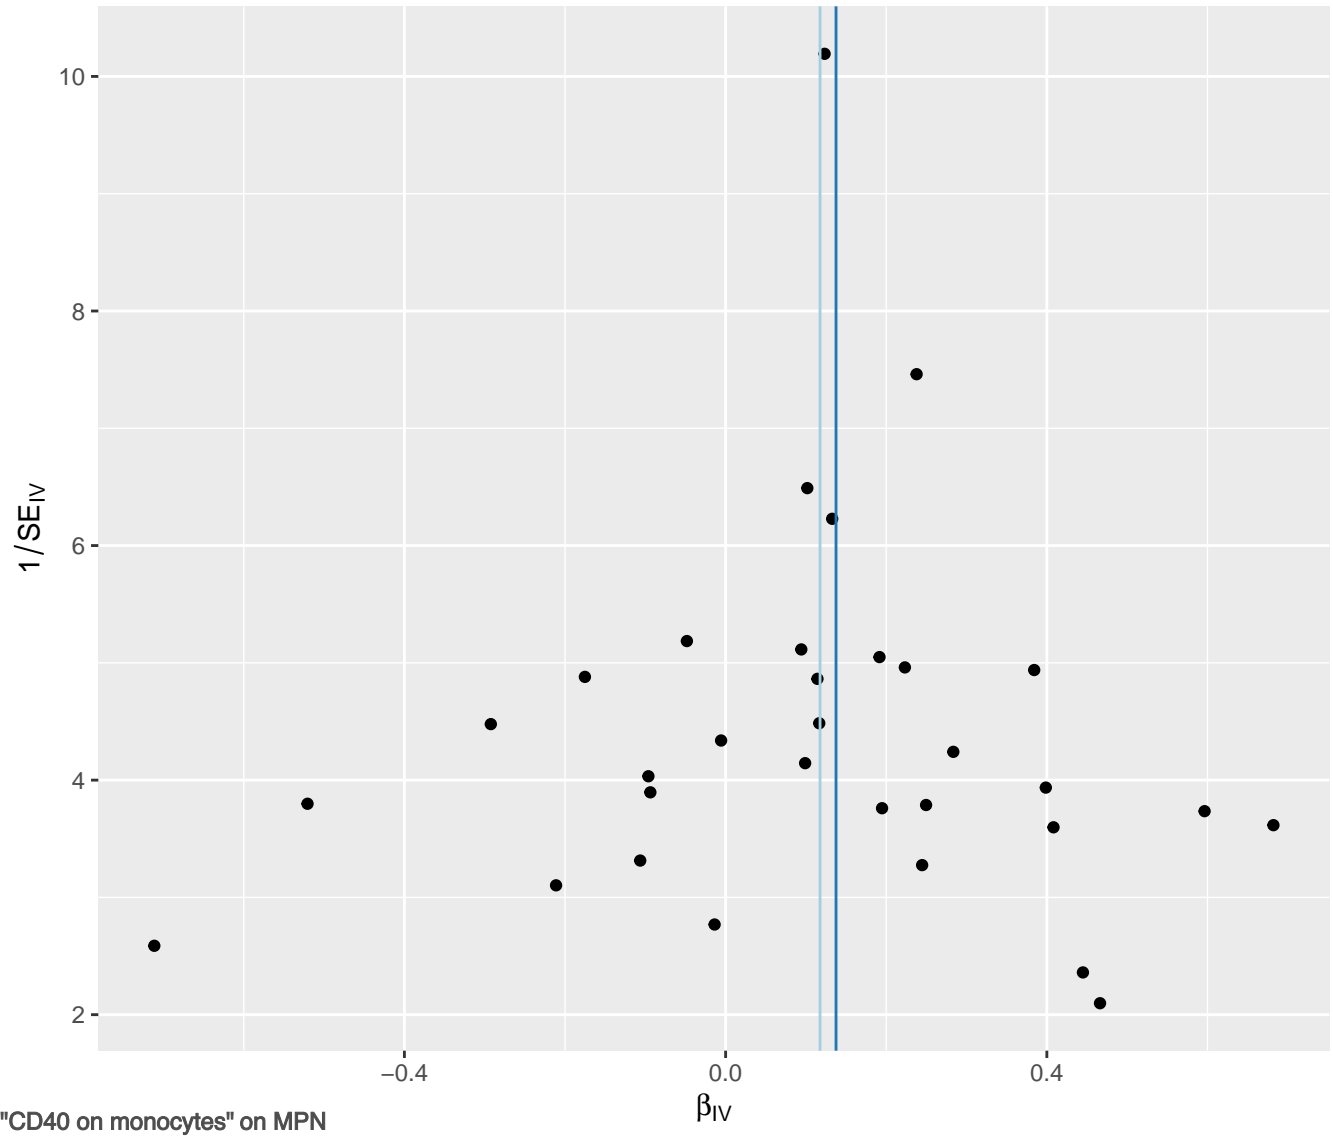



### MR Method

- Inverse variance weighted
- MR Egger

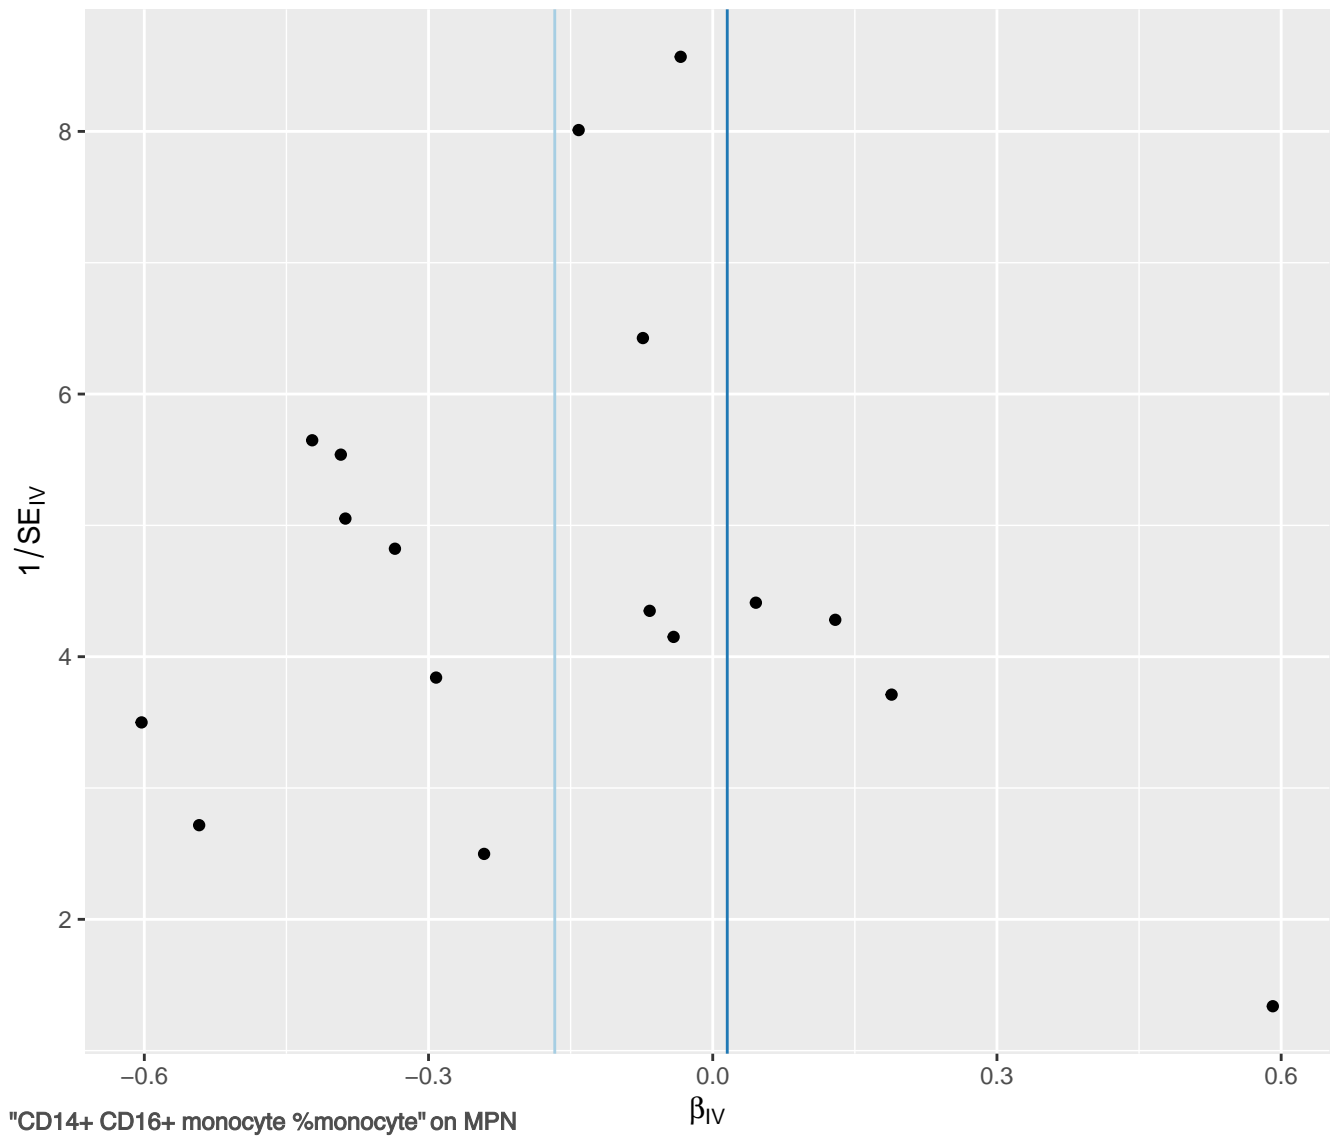

### MR Method

- Inverse variance weighted
- MR Egger

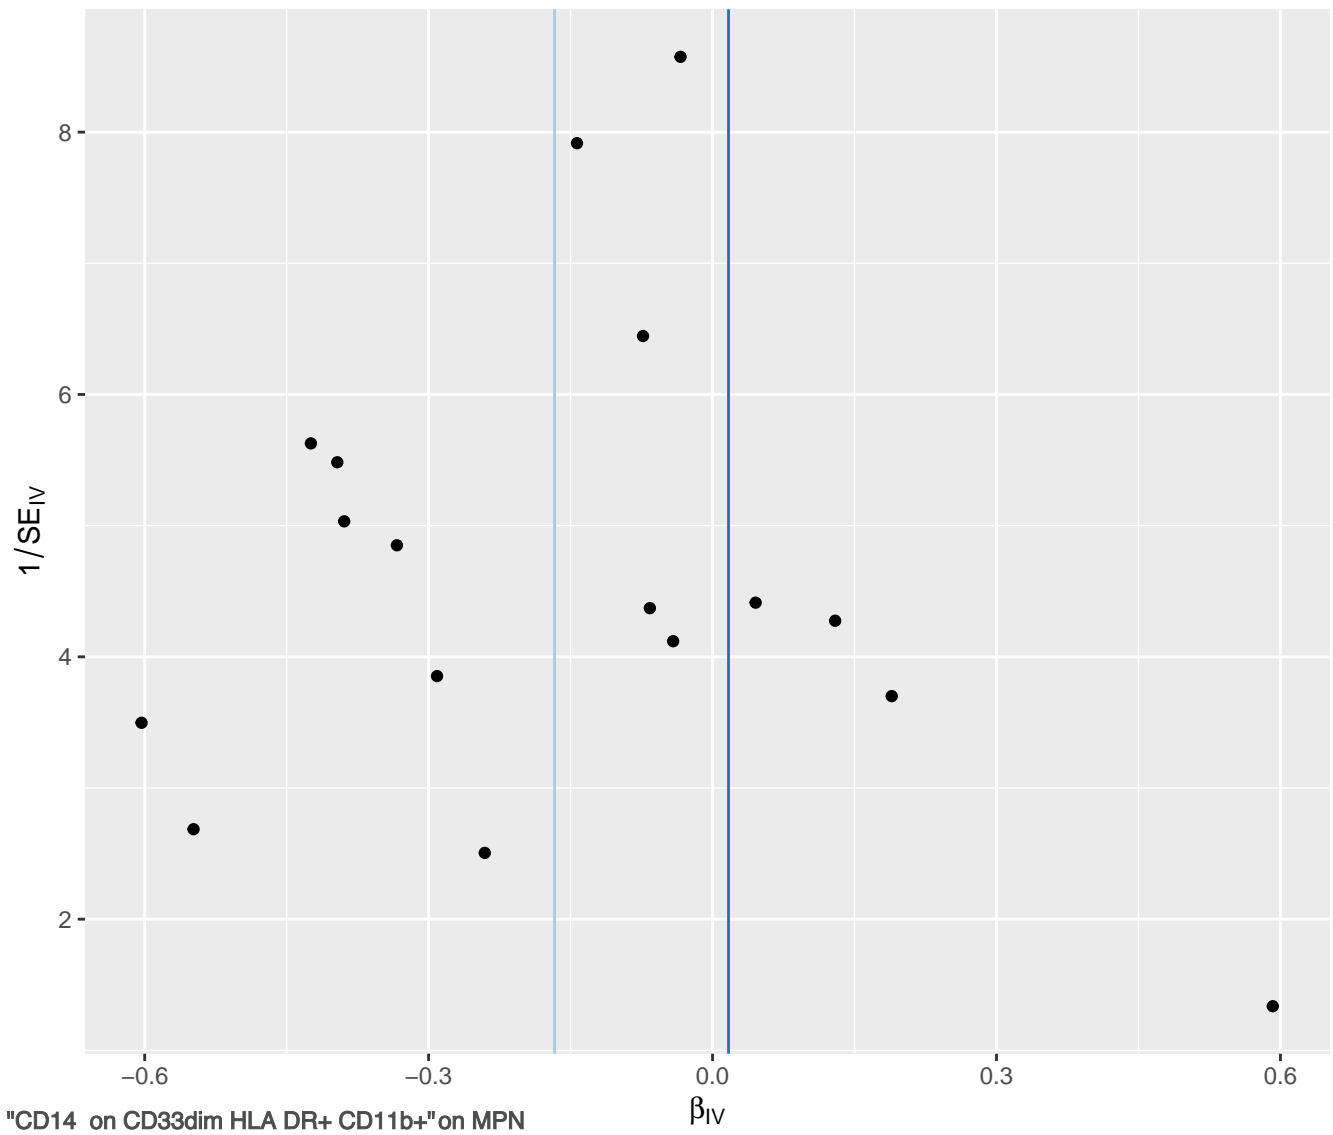

### MR Method

- Inverse variance weighted
- MR Egger

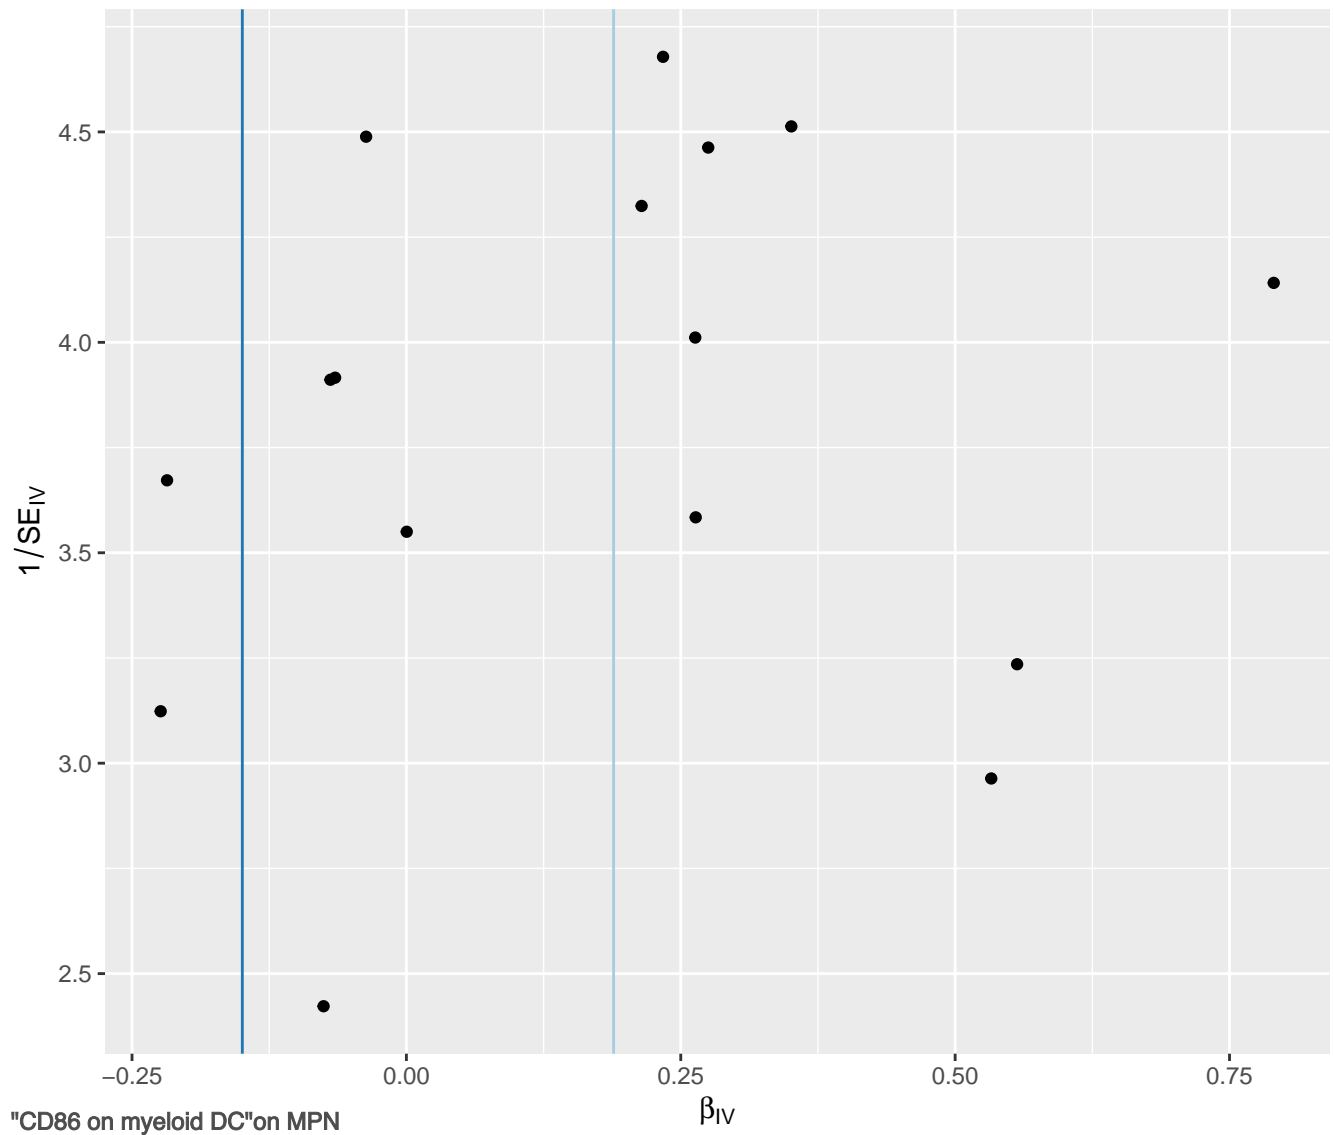

### MR Method

- Inverse variance weighted
- MR Egger

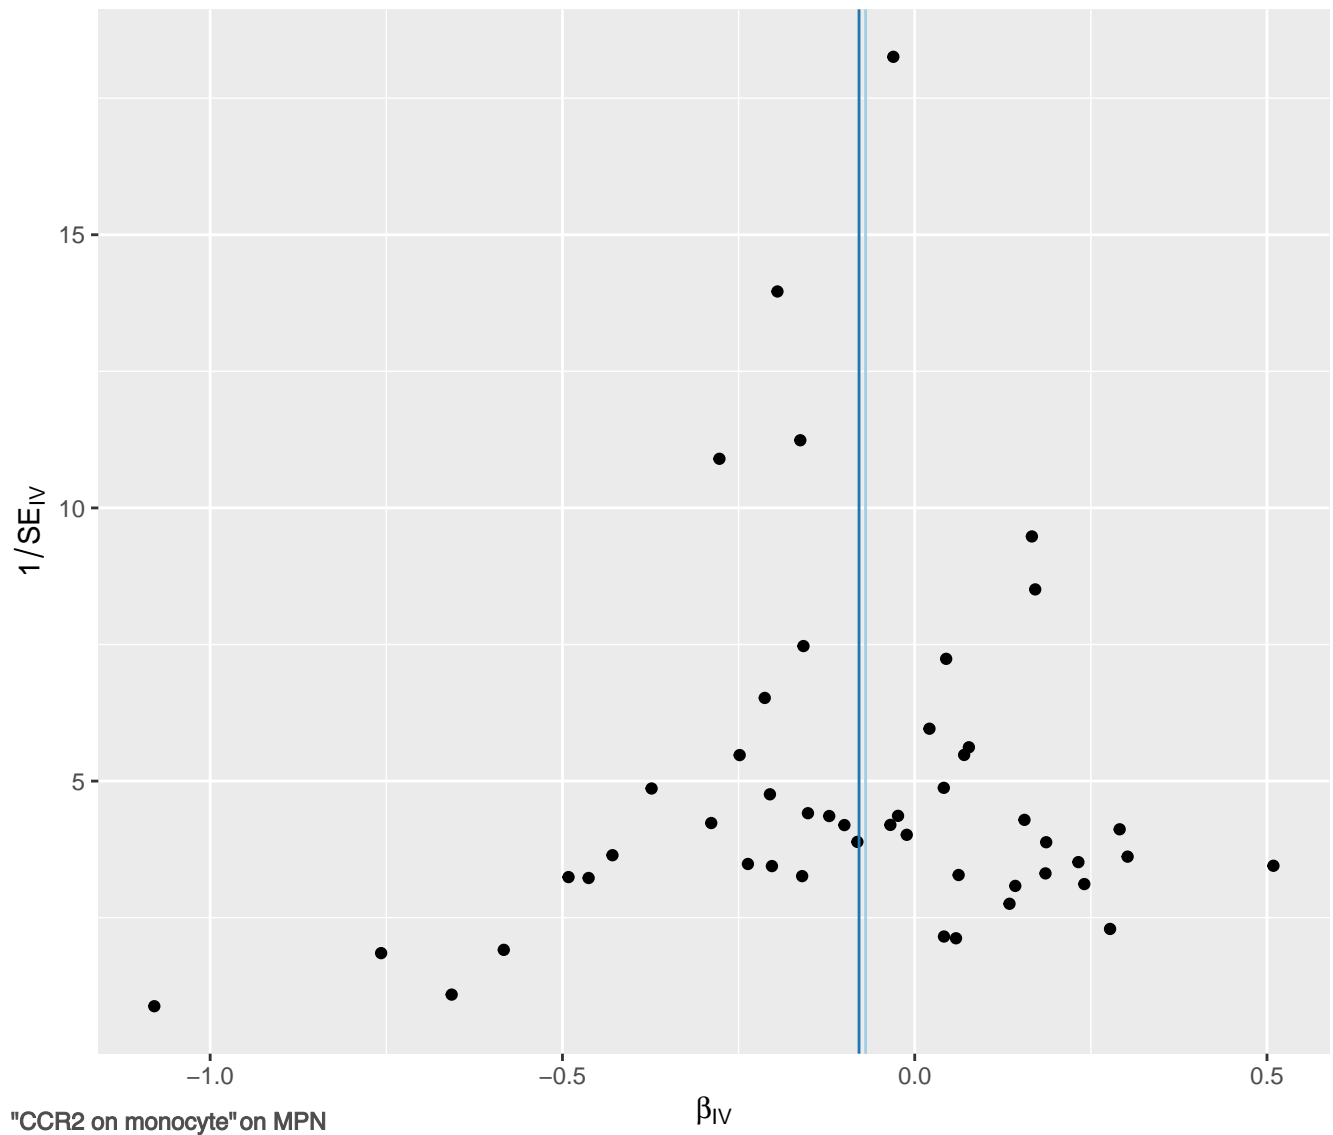

MR Method

- Inverse variance weighted
- MR Egger

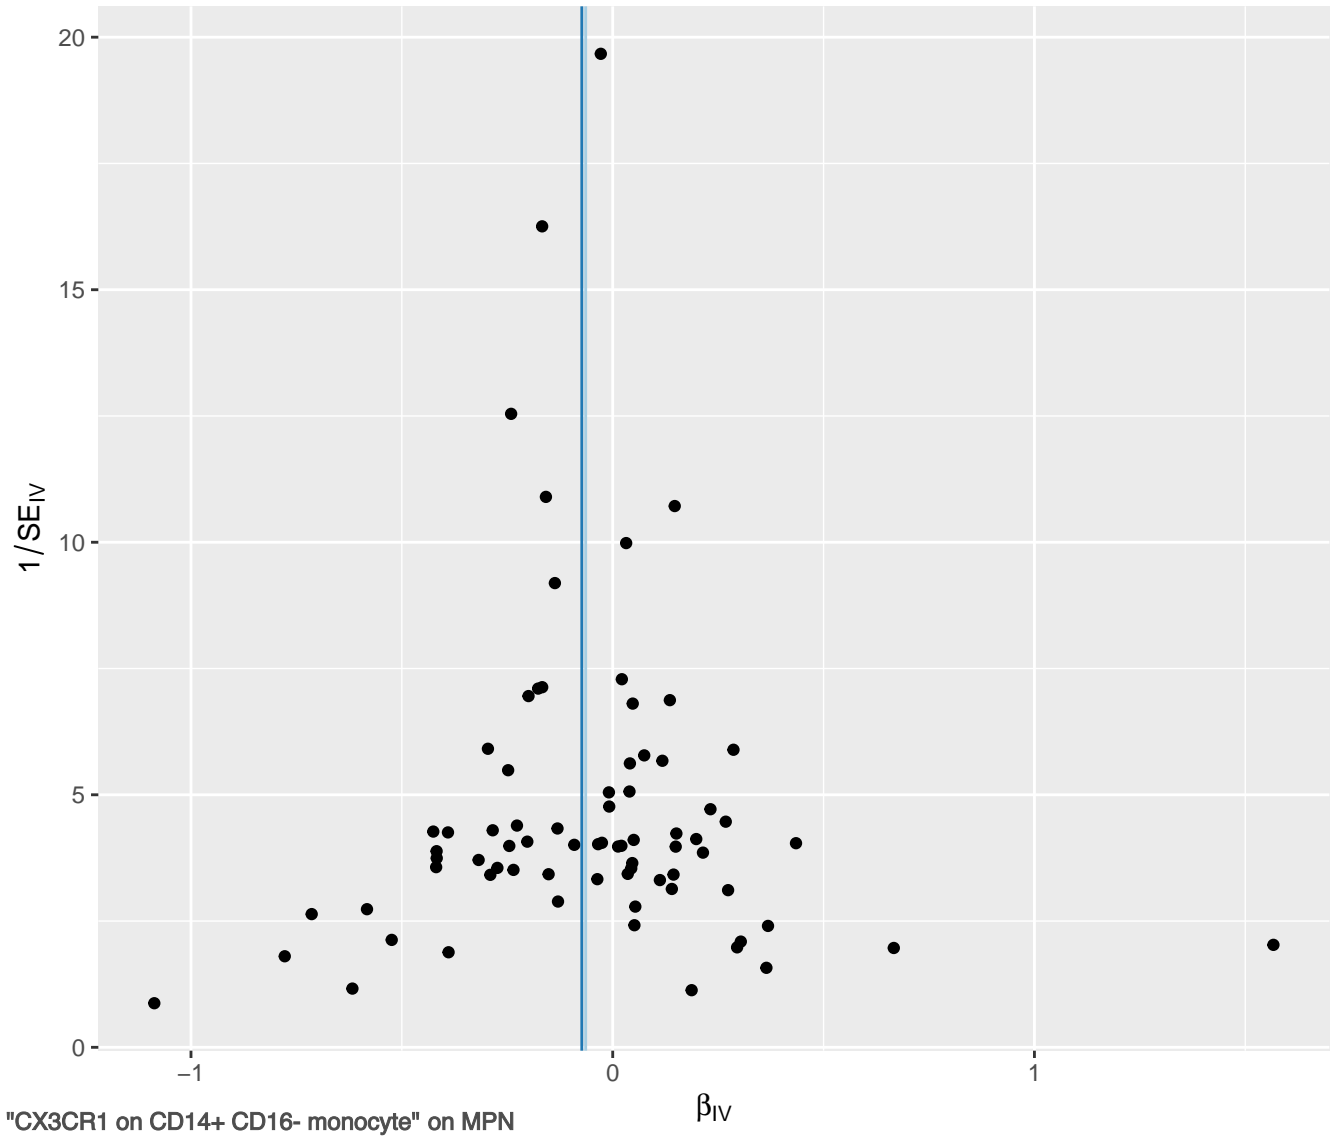

"CX3CR1 on CD14+ CD16- monocyte" on MPN

$\beta_{IV}$

MR Method

- Inverse variance weighted
- MR Egger

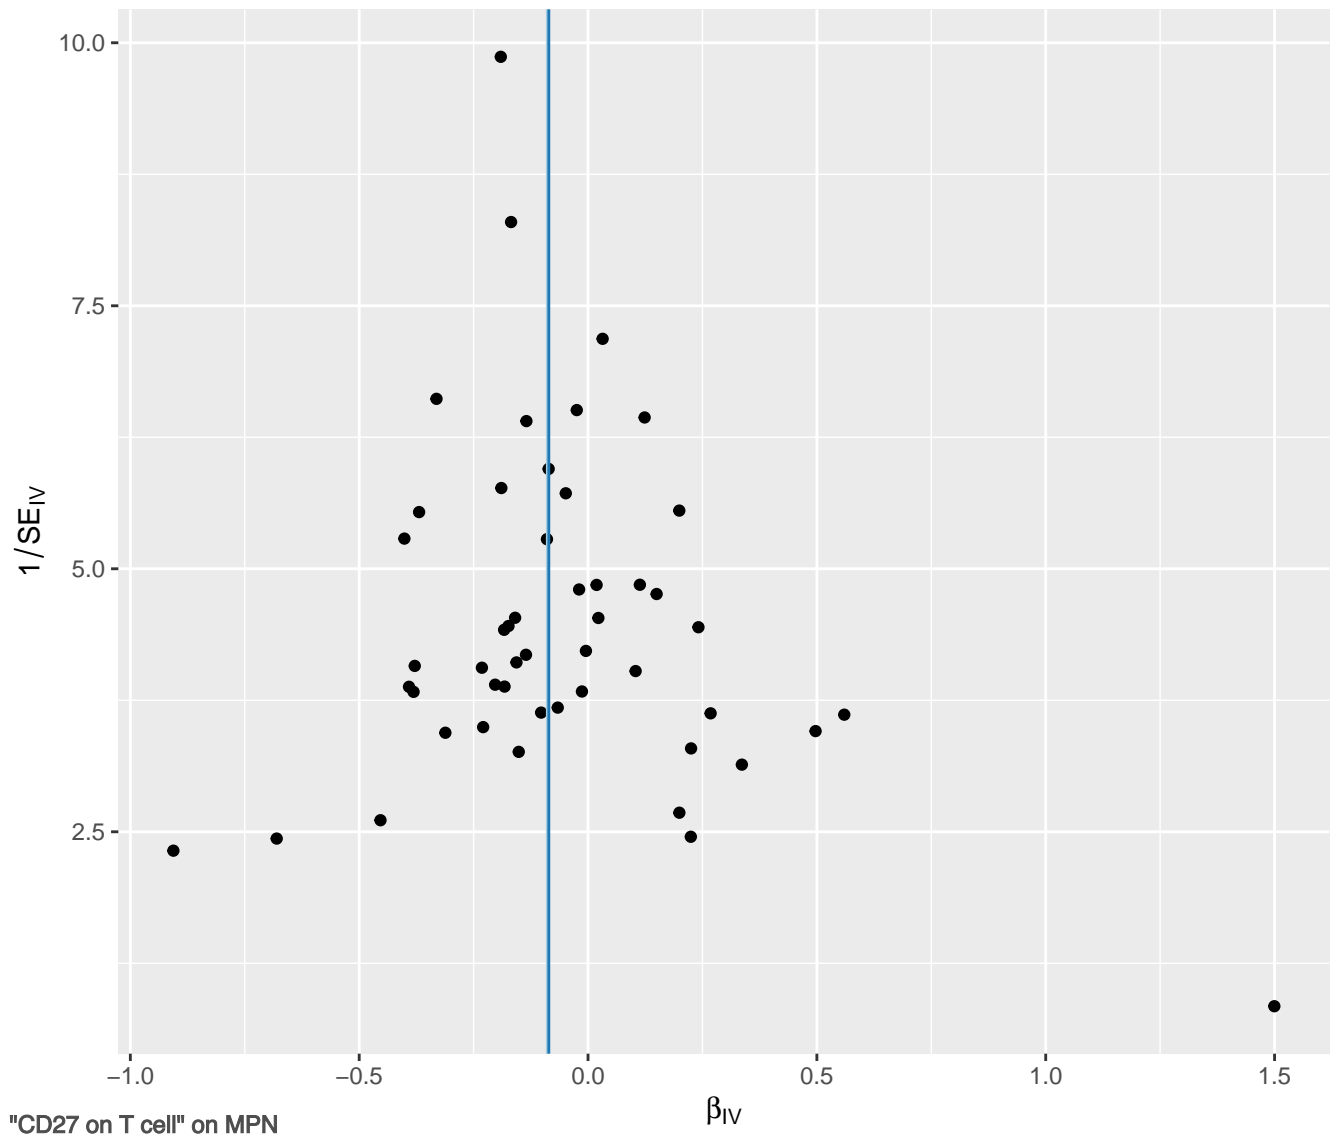

MR Method

- Inverse variance weighted
- MR Egger

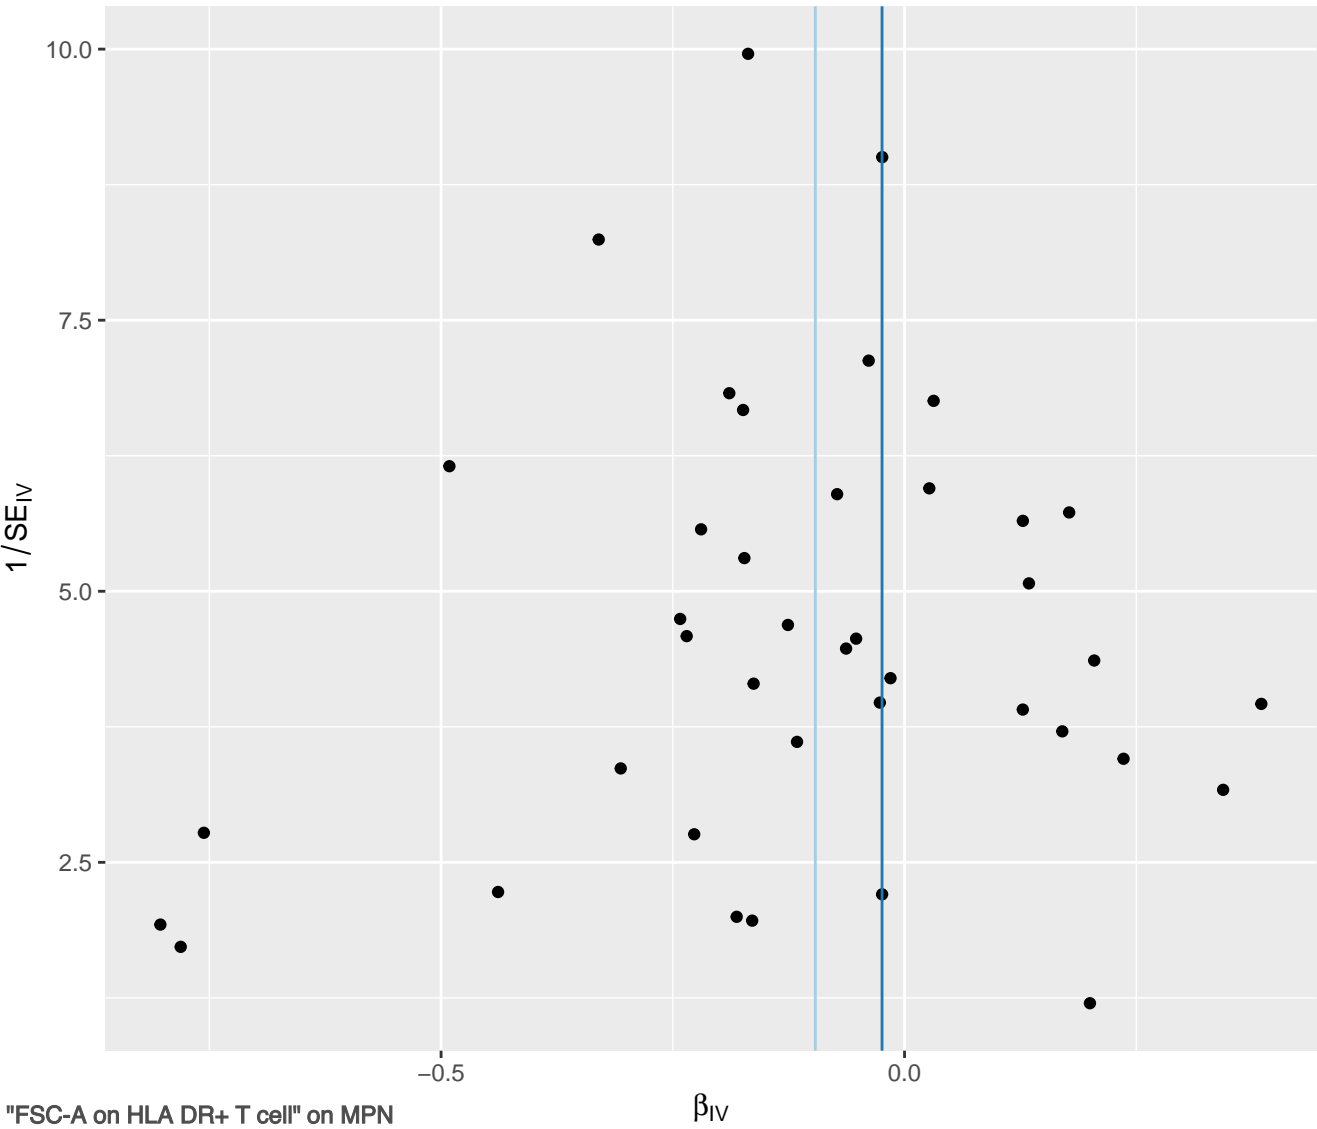

"FSC-A on HLA DR+ T cell" on MPN

### MR Method

- Inverse variance weighted
- MR Egger

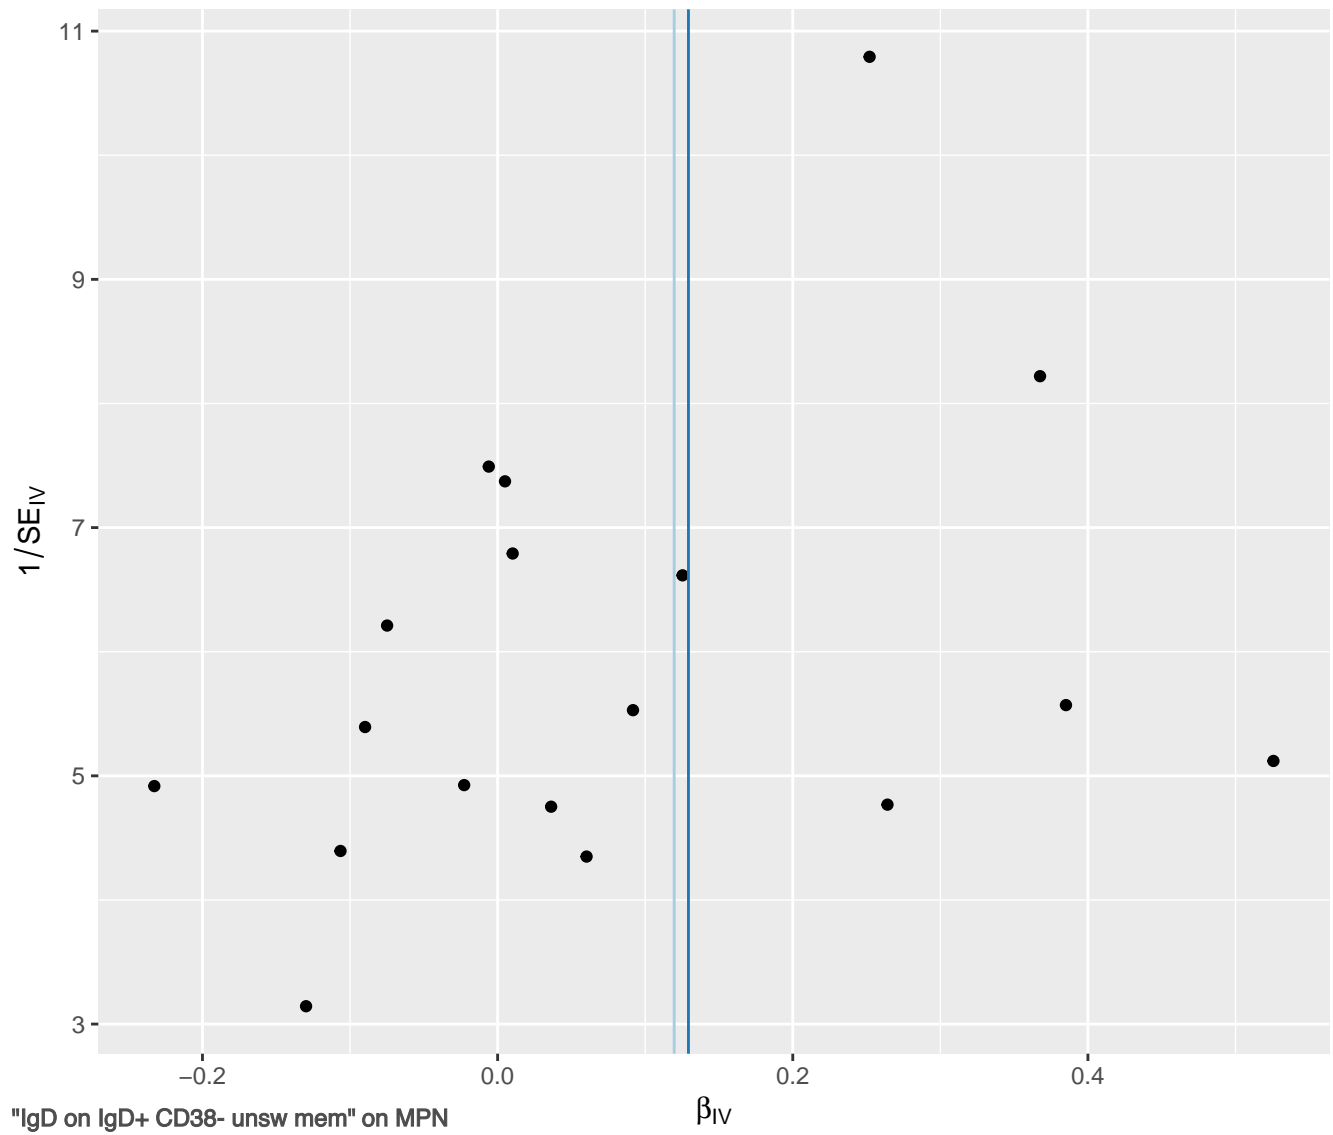



MR Method

- Inverse variance weighted
- MR Egger

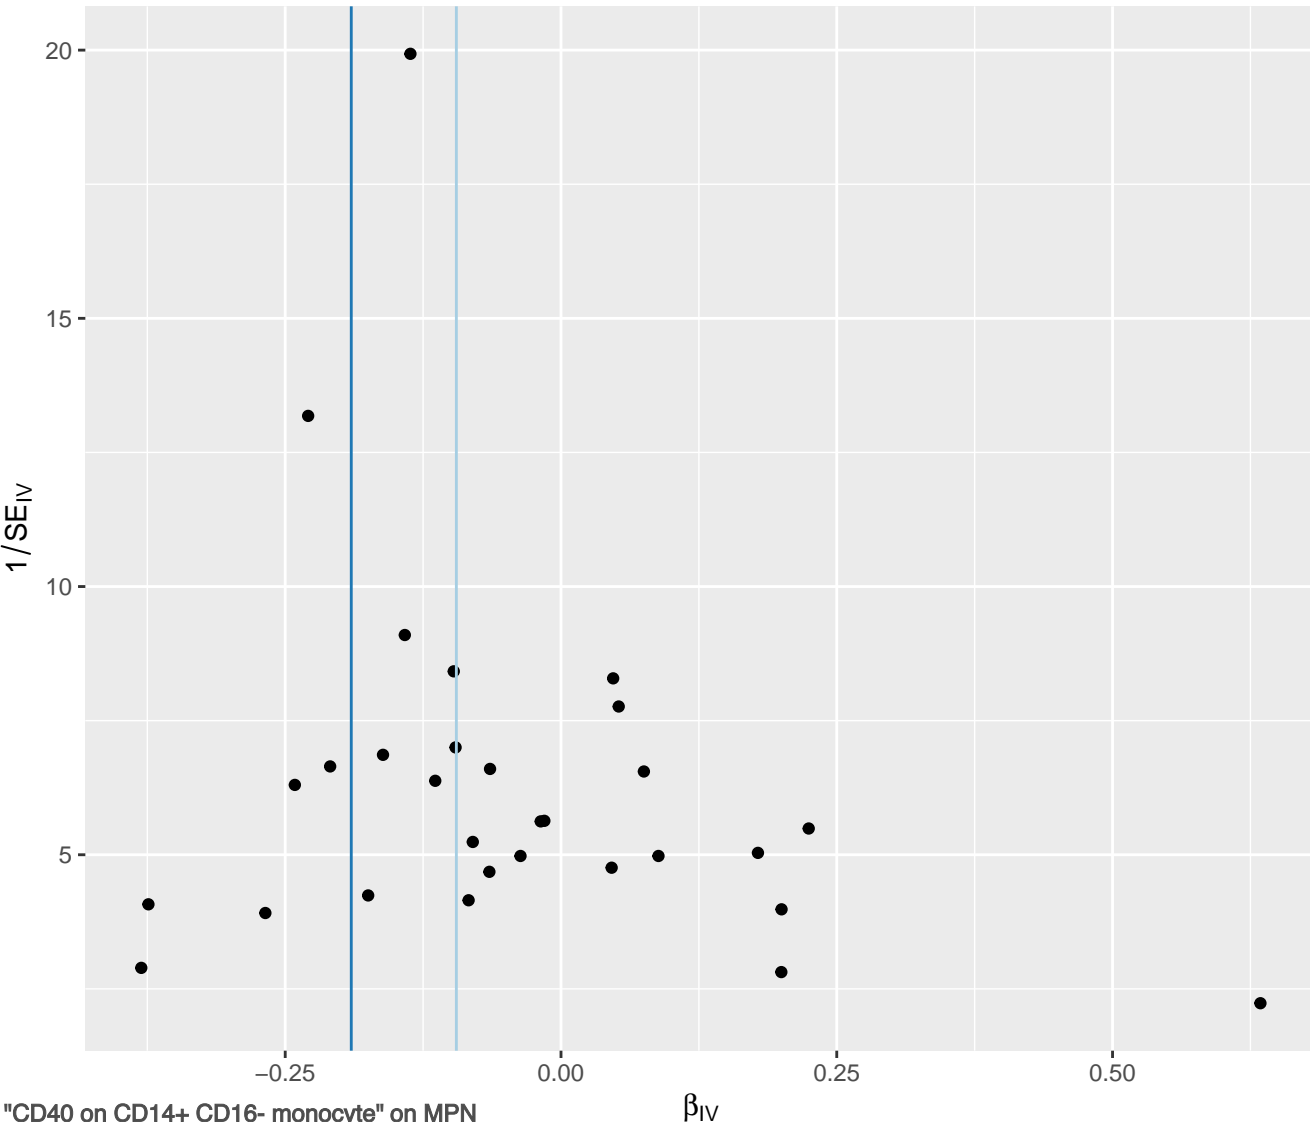

Supplement: medi-103-e40945-s004.pdf [file medi-103-e40945-s004.pdf]
